# Supplementary material for: The First Five Mitochondrial Genomes for the Family Nidulariaceae Reveal Novel Gene Rearrangements, Intron Dynamics, and Phylogeny of Agaricales
Source: MDPI journal article supplement (doi:10.3390/ijms241612599), 2023-08-09
Supplement: s1 [file s1]

## Content

|                                                                                                 |   |
|-------------------------------------------------------------------------------------------------|---|
| Predicted secondary cloverleaf structures for tRNAs of <i>Cyathus striatus</i> 87405.....       | 2 |
| Predicted secondary cloverleaf structures for tRNAs of <i>Cyathus striatus</i> AH440044.....    | 3 |
| Predicted secondary cloverleaf structures for tRNAs of <i>Cyathus jiyuguanensis</i> 765.....    | 4 |
| Predicted secondary cloverleaf structures for tRNAs of <i>Cyathus pallidus</i> QL1.....         | 5 |
| Predicted secondary cloverleaf structures for tRNAs of <i>Cyathus stercoreus</i> NPCB004.....   | 6 |
| Heterogeneous sequence differentiation of mitochondrial genome based on the four data sets..... | 7 |
| Base substitution saturation analysis based on the four datasets, conducted by DAMBE.....       | 8 |



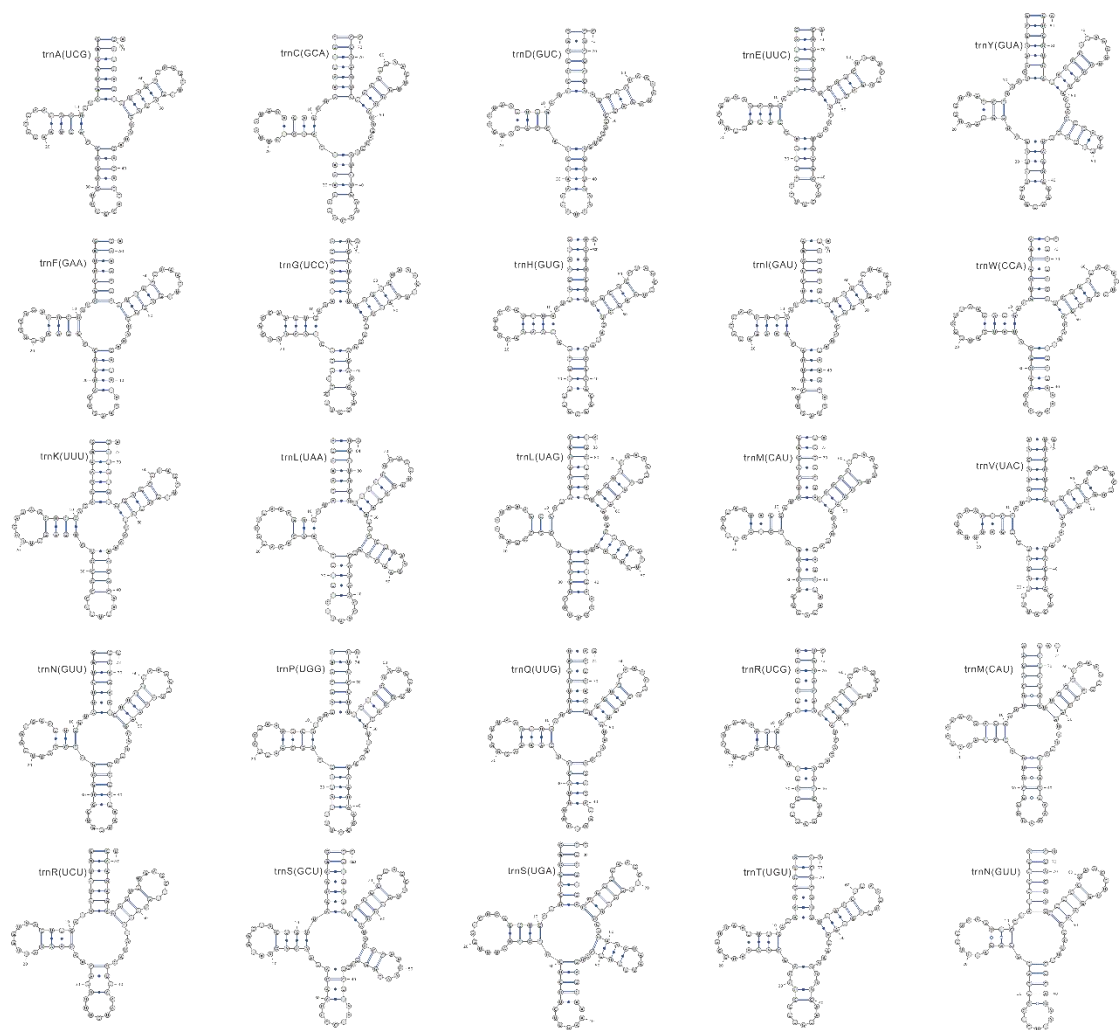

**Figure S1. Predicted secondary cloverleaf structures for tRNAs of *Cyathus striatus* 87405.**



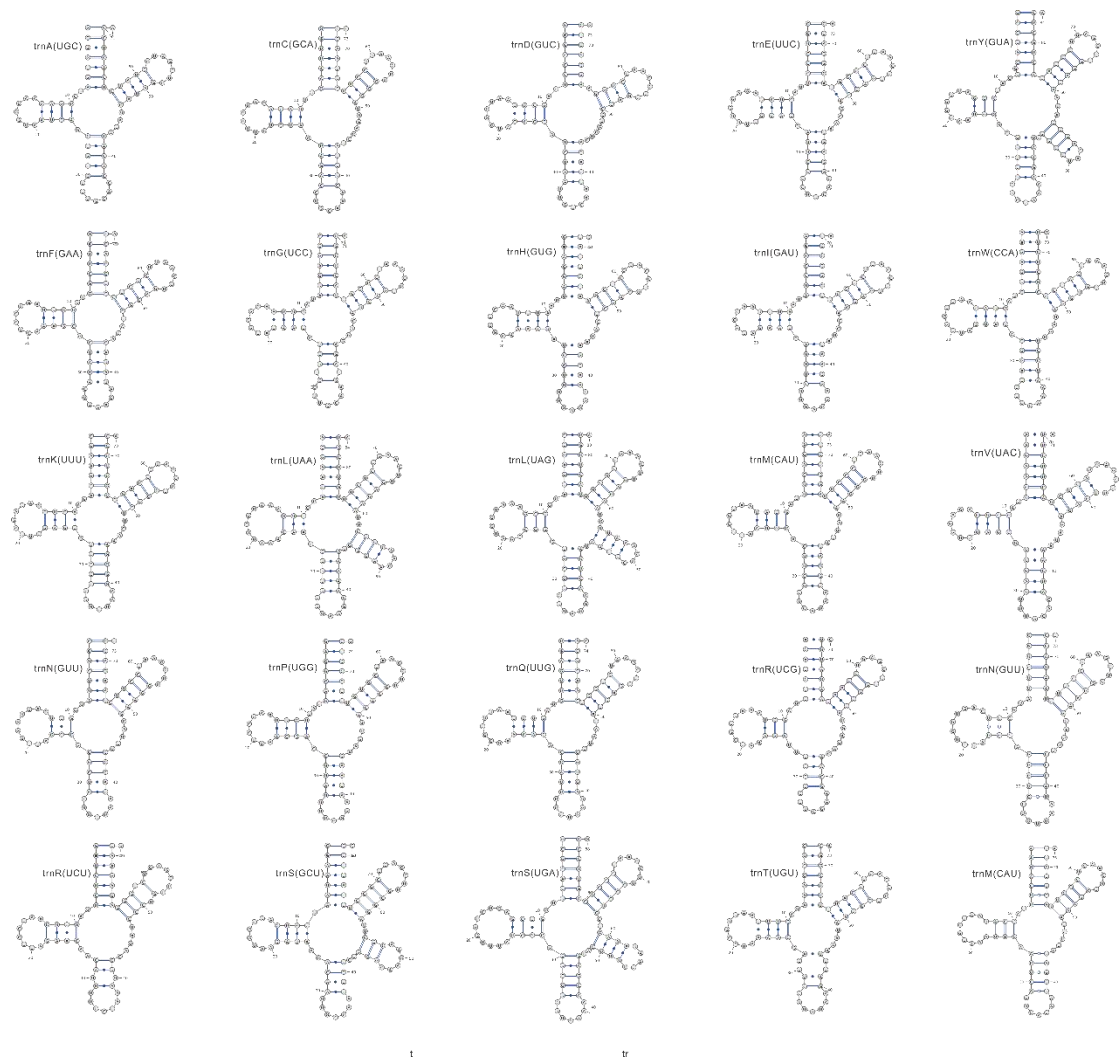

**Figure S2. Predicted secondary cloverleaf structures for tRNAs of *Cyathus striatus* AH440044.**



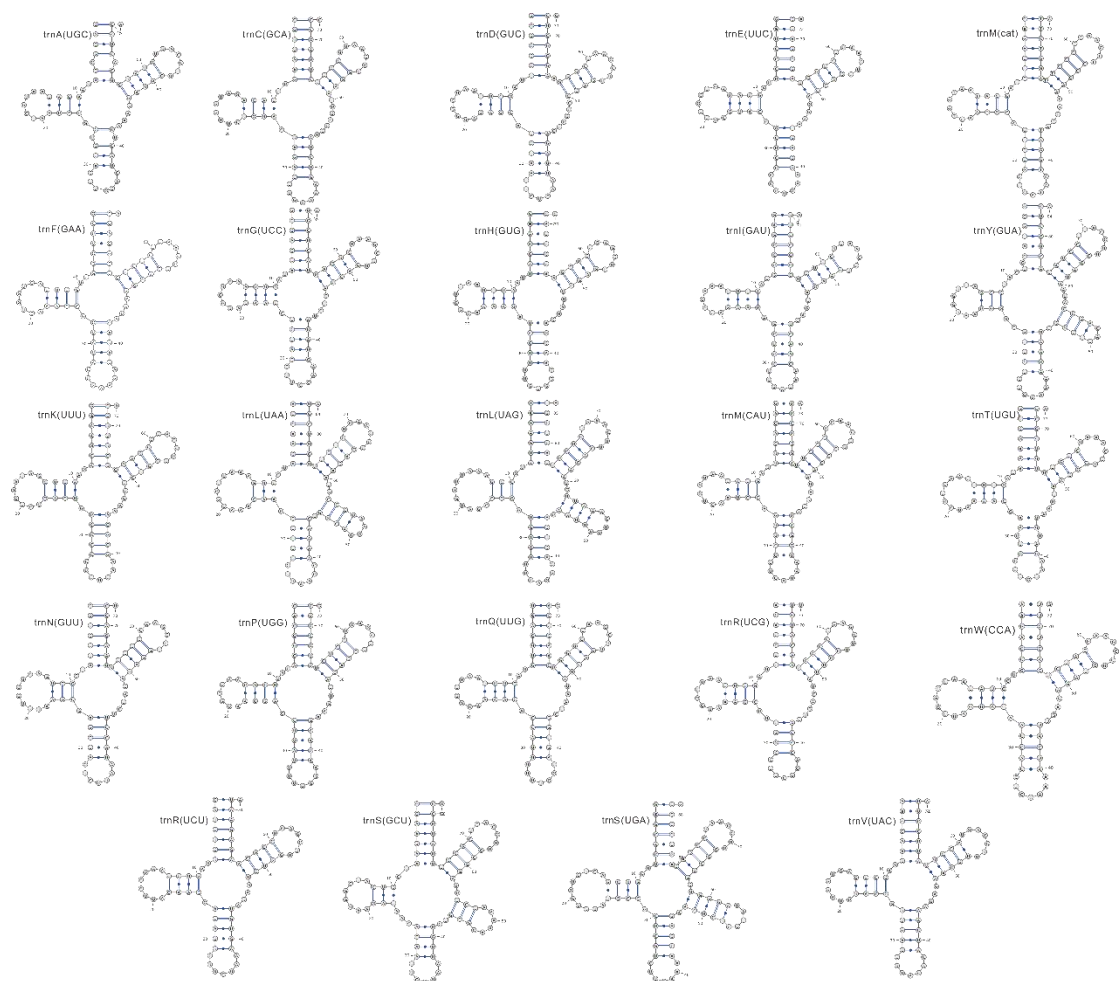

**Figure S3. Predicted secondary cloverleaf structures for tRNAs of *Cyathus jaiyuguanensis* 765.**



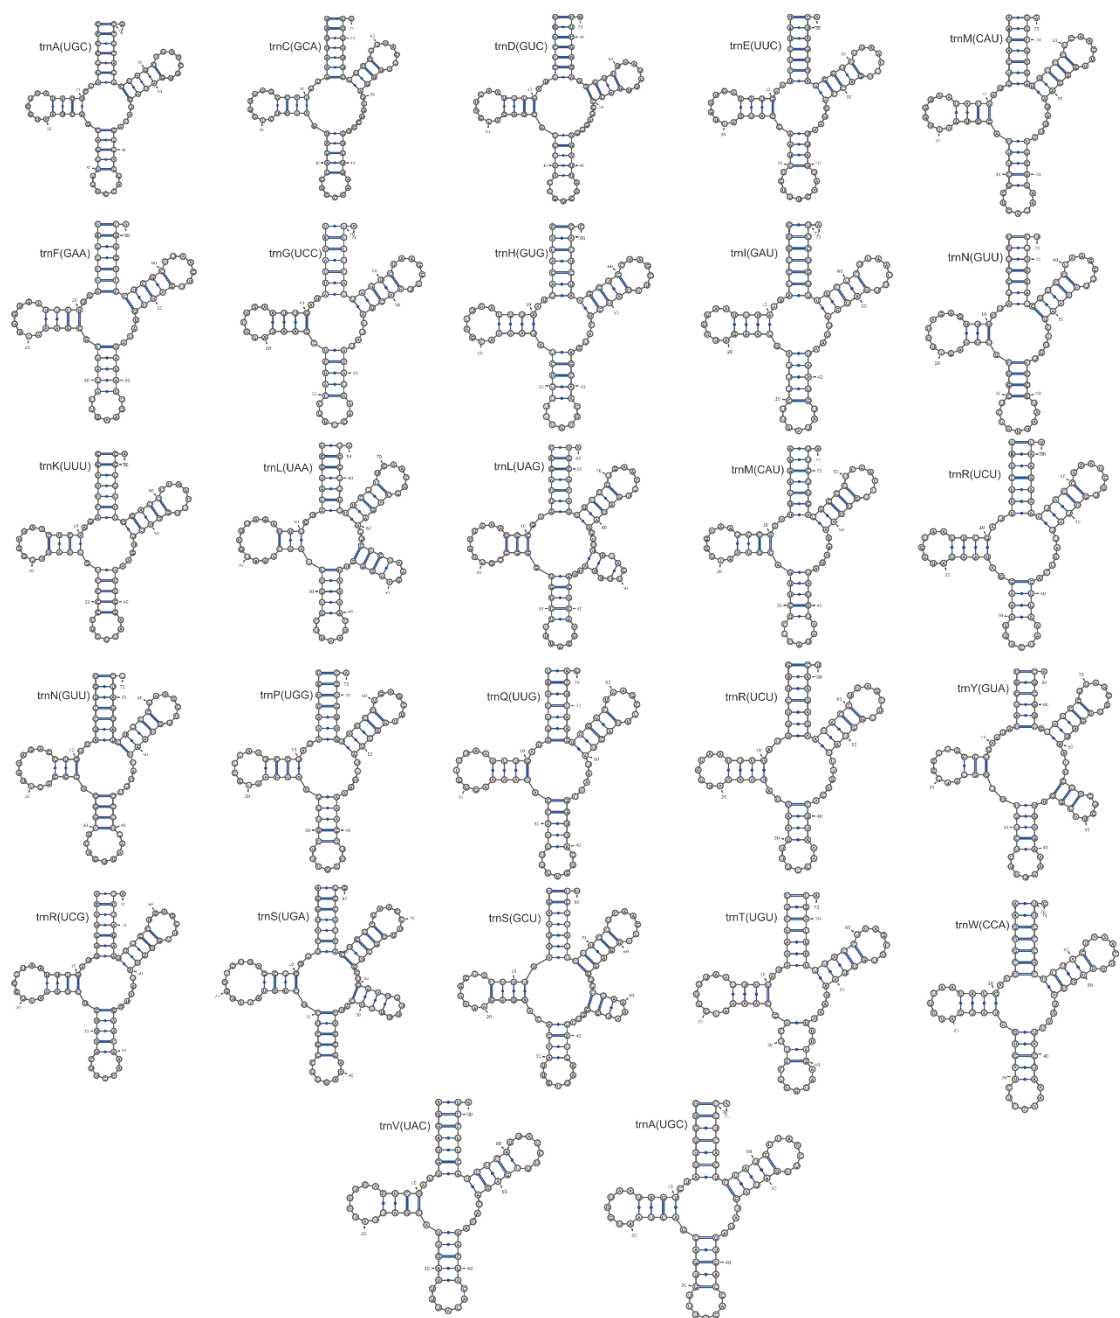

**Figure S4. Predicted secondary cloverleaf structures for tRNAs of *Cyathus pallidus* QL1.**



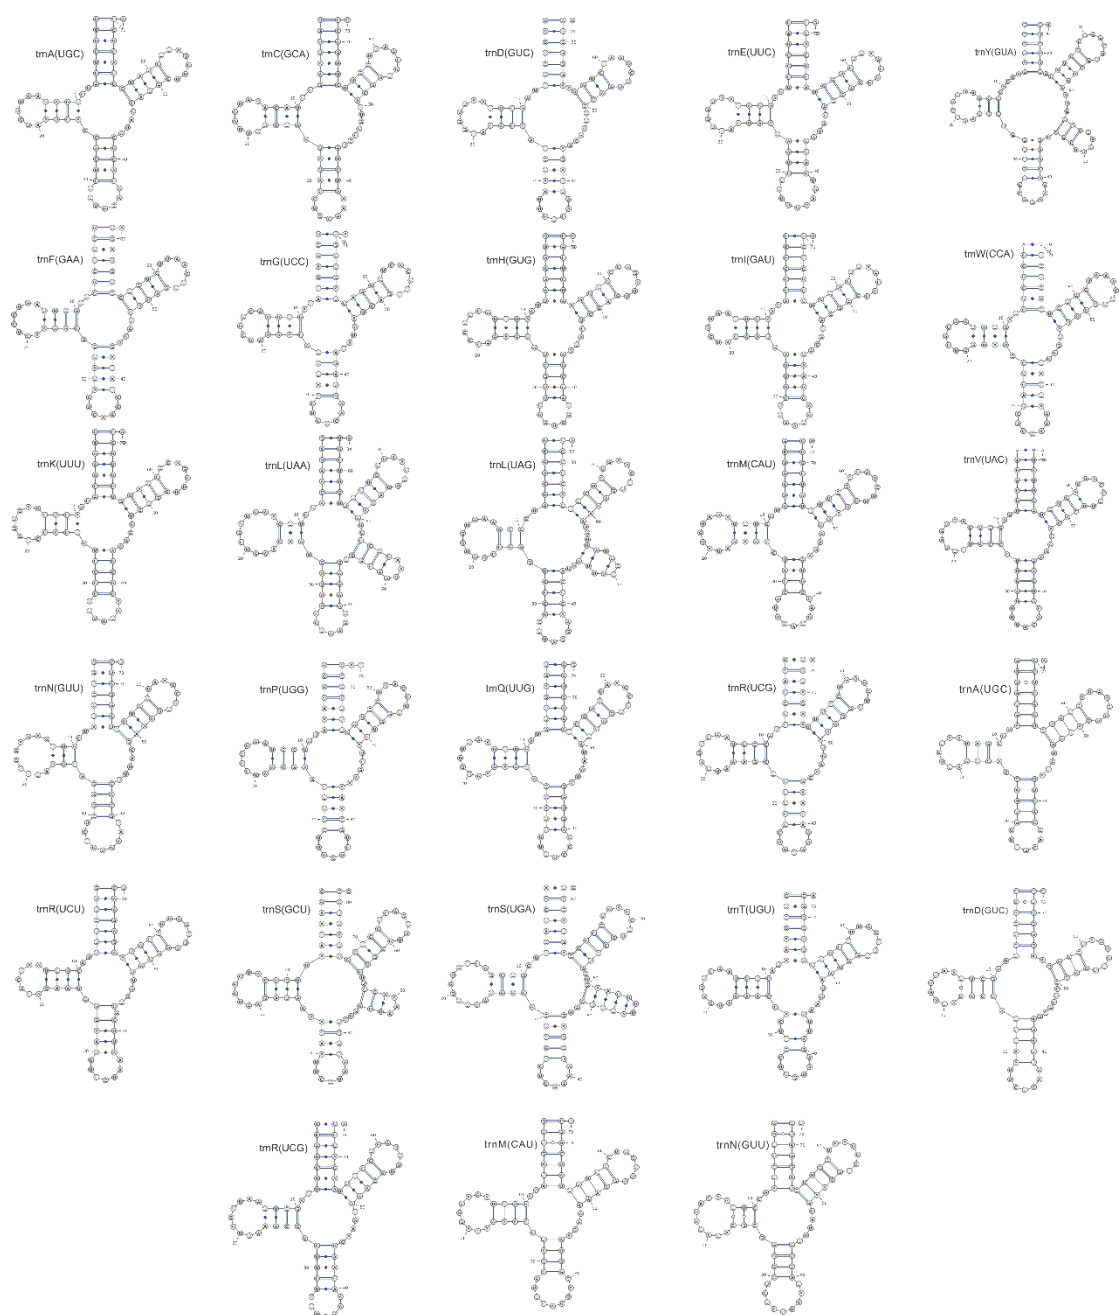

**Figure S5. Predicted secondary cloverleaf structures for tRNAs of *Cyathus stercoreus* NPCB004.**



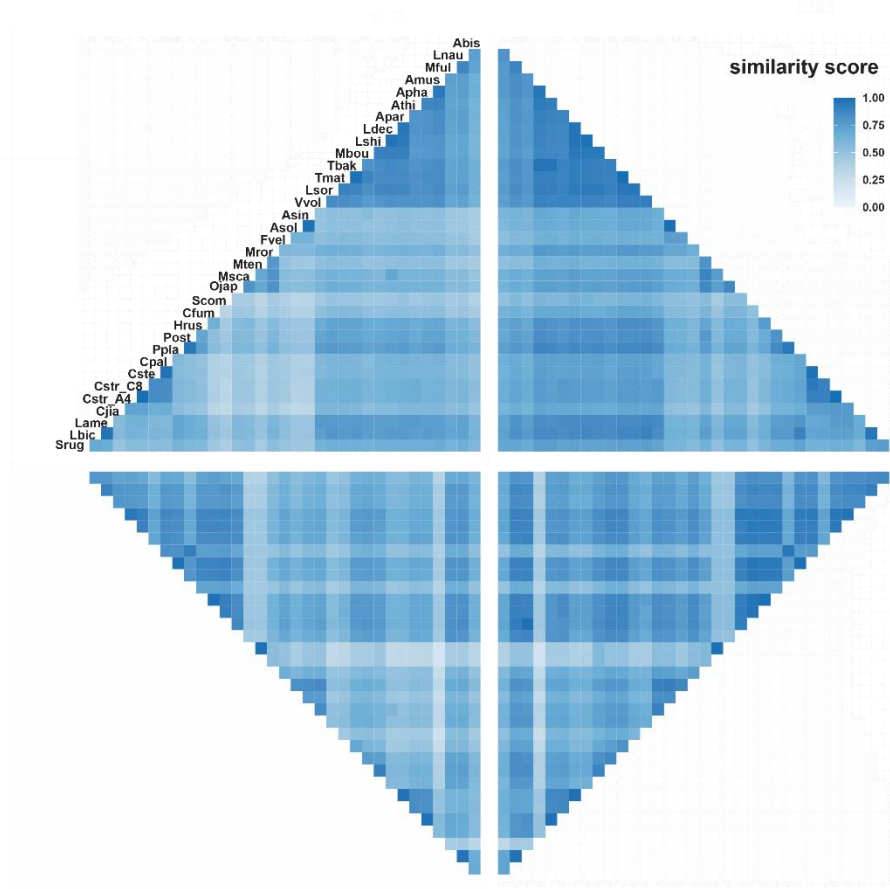

**Figure S6. Heterogeneous sequence differentiation of mitochondrial genome based on the four data sets.**

The average similarity score between the sequences is represented by a colored block, based on an AliGROOVE2 score from 0 to 1.



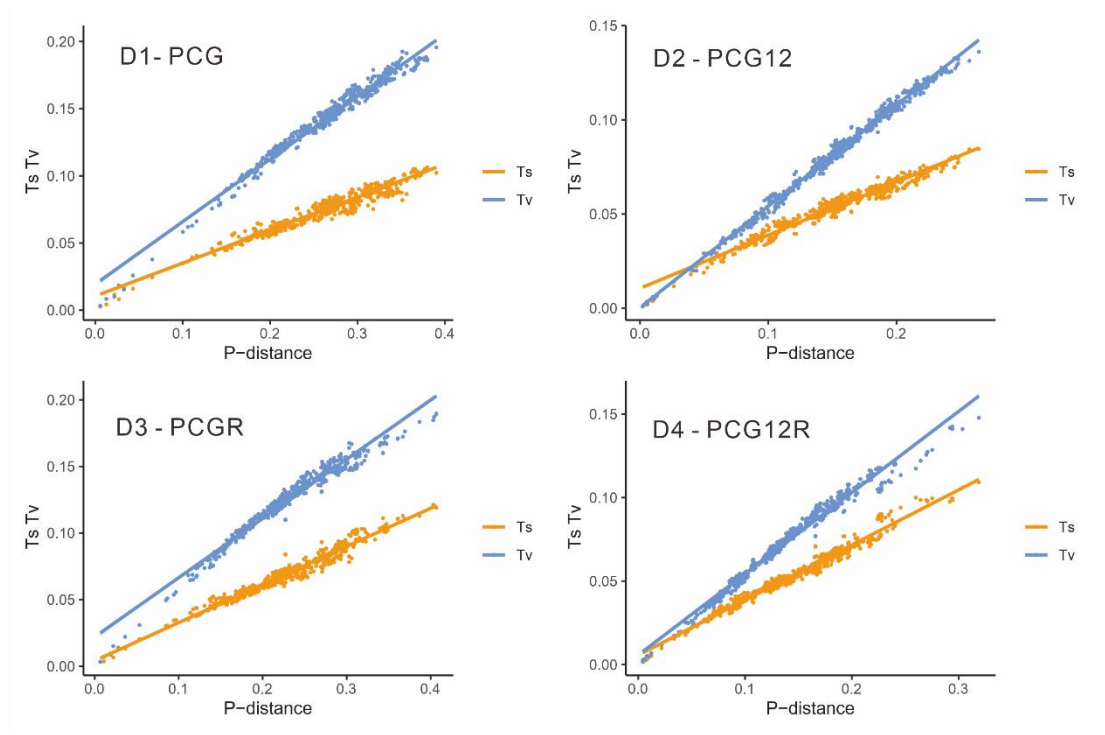

**Figure S7. Base substitution saturation analysis based on the four datasets, conducted by DAMBE.**
