# Supplementary material for: The First Five Mitochondrial Genomes for the Family Nidulariaceae Reveal Novel Gene Rearrangements, Intron Dynamics, and Phylogeny of Agaricales
Source: Int J Mol Sci. 2023 Aug 9;24(16):12599. doi: 10.3390/ijms241612599 (PMC10454537; doi:10.3390/ijms241612599)
Supplement: Supplementary file 1 [file ijms-24-12599-s001.zip › Supplementary tables.xlsx]

## Sheet: Sheet0
The first five mitochondrial genomes for the family Nidulari-aceae reveal novel gene rearrangements, intron dynamics, phylogeny of Agaricales
Zhao-chen Li 1#, Tian-chen Xie 1#, Xi-long Feng 1, Zhen-xin Wang 1, Chao Lin 1, Guo-ming Li1, Xiu-Zhang Li 2 and Jianzhao Qi 1*
1 Shaanxi Key Laboratory of Natural Products & Chemical Biology, College of Chemistry & Pharmacy, North-west A&F University, Yangling, Xianyang 712100, China 2 State Key Laboratory of Plateau Ecology and Agriculture, Qinghai Academy of Animal and Veterinary Sci-ences, Qinghai University, Xining 810016, China #They contributed equally to this paper. * Correspondence: qjz@nwafu.edu.cn

## Sheet: Sheet1
Table S1 Comparison on mitogenomes among 34 Agaricales species
	Asterophora parasitica	Marasmius tenuissimus	Schizophyllum commune	Lyophyllum decastes	Hygrophorus russula	Lepista sordida	Macrolepiota fuliginosa	Stropharia rugosoannulata	Leucoagaricus naucinus	Amanita muscaria	Volvariella volvacea	Laccaria amethystina	Pleurotus ostreatus	Lyophyllum shimeji	Pleurotus platypus	Tricholoma matsutake	Marasmiellus scandens	Flammulina velutipes	Moniliophthora roreri	Laccaria bicolor	Myochromella boudieri	Amanita phalloides	Tricholoma bakamatsutake	Armillaria sinapina	Cyathus pallidus QL1	Cyathus jiayuguanensis 765	Cyathus striatus AH44044	Armillaria solidipes	Cyathus striatus 87405	Cyathus stercoreus NPCB004	Agaricus bisporus	Amanita thiersii	Omphalotus japonicus	Clavaria fumosa
GC content (%)	0.3173	0.2704	0.2186	0.2227	0.1913	0.2604	0.3634	0.3105	0.2607	0.2373	0.3846	0.2339	0.2635	0.2794	0.2679	0.2068	0.3204	0.1654	0.2763	0.2832	0.2794	0.2456	0.2231	0.285	0.277	0.3012	0.2734	0.2918	0.2732	0.2949	0.2907	0.24	0.2936	0.1974
AT content (%)	0.6827	0.7296	0.7814	0.7773	0.8087	0.7396	0.6366	0.6895	0.7393	0.7627	0.6154	0.7661	0.7365	0.7206	0.7321	0.7932	0.6796	0.8346	0.7237	0.7168	0.7206	0.7544	0.7769	0.715	0.723	0.6988	0.7266	0.7082	0.7268	0.7051	0.7093	0.76	0.7064	0.8026
GC skew (%)	0.0407	0.0579	0.0254	-0.0258	0.0681	-0.00937	0.0317	0.0524	0.0406	0.0347	-0.00736	0.0255	0.0163	0.00865	0.00567	0.0732	0.0368	0.0734	0.0238	-0.0124	0.0362	0.0403	0.0761	0.0301	-0.147	0.01	-0.124	0.0259	-0.122	-0.132	0.00879	0.0262	0.0235	0.0499
AT skew (%)	0.0108	-0.0228	-0.0123	-0.0229	-0.0122	0.0147	0.0129	0.00105	0.0233	-0.00973	-0.00353	0.00725	-0.00193	0.0188	-0.00572	0.0223	-0.0327	-0.0234	-0.0176	-0.0089	0.00282	0.00835	0.0196	0.0123	0.0938	-0.0111	0.0734	0.01	0.0662	0.0733	0.0114	0.00568	0.00359	0.00865
Number of tRNAs	26	25	27	26	26	26	24	29	26	27	25	25	24	26	24	26	25	26	26	25	27	27	19	25	27	24	25	26	25	28	35	28	26	38
Number of introns	2	1	0	0	3	1	6	8	18	7	6	8	12	10	10	11	9	10	12	10	21	20	26	24	13	19	26	30	28	24	46	22	28	64
Number of core genes	15	15	15	15	15	15	15	15	15	15	15	15	15	15	15	15	15	15	15	15	15	15	14	15	15	15	15	15	15	15	15	15	15	15
Number of un_ORFs	4	3	5	3	7	5	24	11	15	18	14	10	13	15	19	13	14	19	41	15	19	34	32	30	16	24	28	33	29	23	40	28	58	106
Mitogenome length (bp)	43328	44461	49704	50643	55769	57375	59025	60551	61434	62233	62541	65156	73242	73678	73807	76034	86201	88395	93722	95304	99774	101106	103090	103563	114236	115936	120589	122167	127920	129263	135005	137428	157545	256807
Length of core genes (bp)	14940	14040	18846	14487	14151	14775	15234	14259	14223	14805	14544	15225	15087	14376	15216	15009	15168	14616	14400	15600	15435	14949	14043	16056	15750	16899	17307	15435	17319	15711	14247	14277	14307	14589
Length of RNA regions (bp)	7513	7494	7458	8594	7872	8562	9256	7739	7812	7362	7813	7697	9098	9031	7147	9376	7654	9065	8064	7547	6856	7515	7315	8214	7827	8087	7472	7807	7867	8146	8782	7663	7844	7940
Length of un_ORFs (bp)	2328	3327	3123	3252	5178	4692	7917	9777	12693	14601	9060	6744	14469	13611	18720	9984	12489	11967	28053	12753	19002	25665	30780	25911	10593	26163	23616	31629	24897	16227	35741	20115	42279	91440
Length of HEGs (bp)	0	957	645	0	1950	0	4740	5883	10836	5238	5841	5049	6018	5826	9855	6291	9144	3417	11256	7131	14472	11949	19197	20292	8652	12762	21690	20496	22518	13662	28990	11763	22512	50205
Length of intronic regions (bp)	2660	1055	0	0	889	488	2540	3030	9386	2625	1333	3811	5452	3533	2462	8450	3121	10990	5730	6262	19264	11019	14095	21032	8012	14685	14345	24465	14298	17125	27556	18237	21847	41937
Length of intergenic regions (bp)	15887	18545	20277	24310	27679	28858	24078	25746	17320	22840	29791	31679	29136	33127	30262	33215	47769	41757	37475	53142	39217	41958	36857	32350	72054	50102	57849	42831	63539	72054	48679	77136	71268	100901
Length of core genes (%)	0.344812	0.315782	0.379165	0.286061	0.253743	0.257516	0.258094	0.235487	0.231517	0.237896	0.232551	0.23367	0.205988	0.195119	0.206159	0.197399	0.175961	0.165349	0.153646	0.163687	0.1547	0.147855	0.136221	0.155036	0.137872	0.145761	0.143521	0.126343	0.135389	0.121543	0.105529	0.103887	0.0908121	0.0568092
Length of RNA regions (%)	0.173398	0.168552	0.150048	0.169698	0.141154	0.149229	0.156815	0.12781	0.127161	0.118297	0.124926	0.118132	0.124218	0.122574	0.0968336	0.123313	0.0887925	0.102551	0.0860417	0.0791887	0.0687153	0.0743279	0.0709574	0.079314	0.0685161	0.069754	0.0619625	0.0639043	0.0614994	0.0630188	0.0650494	0.0557601	0.0497889	0.0309182
Length of un_ORFs (%)	0.0537297	0.0748296	0.062832	0.0642142	0.0928473	0.0817778	0.13413	0.161467	0.206612	0.234618	0.144865	0.103505	0.197551	0.184736	0.253634	0.13131	0.144882	0.135381	0.299321	0.133814	0.19045	0.253843	0.298574	0.250196	0.0927291	0.225668	0.195839	0.2589	0.194629	0.125535	0.264738	0.146368	0.268361	0.356065
Length of HEGs (%)	0	0.0215245	0.0129768	0	0.0349657	0	0.080305	0.0971578	0.176384	0.0841676	0.0933947	0.0774909	0.082166	0.0790738	0.133524	0.0827393	0.106078	0.038656	0.1201	0.0748237	0.145048	0.118183	0.186216	0.195939	0.0757379	0.110078	0.179867	0.16777	0.176032	0.105691	0.214733	0.0855939	0.142893	0.195497
Length of intronic regions (%)	0.0613922	0.0237287	0	0	0.0159408	0.00850545	0.0430326	0.0500405	0.152782	0.0421802	0.021314	0.0584904	0.0744382	0.0479519	0.0333573	0.111134	0.0362061	0.124328	0.0611383	0.0657055	0.193076	0.108985	0.136725	0.203084	0.0701355	0.126665	0.118958	0.200259	0.111773	0.132482	0.204111	0.132702	0.138671	0.163302
Length of intergenic regions (%)	0.366668	0.417107	0.407955	0.480027	0.496315	0.502972	0.407929	0.425195	0.281929	0.367008	0.476344	0.486202	0.397805	0.449619	0.410015	0.436844	0.554158	0.472391	0.399853	0.557605	0.393058	0.41499	0.357523	0.31237	0.630747	0.432152	0.47972	0.350594	0.496709	0.557422	0.360572	0.561283	0.452366	0.392906

## Sheet: Sheet2
Table S2 Characterization of the mitogenomes of five Cyathus species
Cyathus striatus 87405				Cyathus striatus AH44044				Cyathus jiayuguanensis 765				Cyathus pallidus QL1				Cyathus stercoreus NPCB004
gene	start	stop	length(bp)	gene	start	stop	length	gene	start	stop	length	gene	start	stop	length	gene	start	stop	length
cox1	1	20329	20329	cox1	1	16995	16995	cox1	1	12379	12379	cox1	1	11138	11138	cox1	1	14850	14850
exon 1	1	162	162	exon1	1	162	162	exon1	1	298	298	exon1	1	380	380	exon1	1	234	234
intron 1	163	2042	1880	intron1	163	2036	1874	intron1	299	2204	1906	intron1	381	1531	1151	intron1	235	2004	1770
orf391	163	1338	1176	orf391	163	1338	1176	orf358	931	2007	1077	exon2	1532	1760	229	orf245	680	1417	738
exon 2	2043	2181	139	exon2	2037	2289	253	exon2	2205	2440	236	intron2	1761	2951	1191	exon2	2005	2136	132
intron 2	2182	2675	494	intron2	2290	3935	1646	intron2	2441	3641	1201	orf349	1761	2810	1050	intron2	2137	3381	1245
exon 3	2676	2682	7	orf414	2292	3536	1245	orf353	2441	3502	1062	exon3	2952	3056	105	orf164	2724	3218	495
intron 3	2683	4780	2098	exon3	3936	4162	227	exon3	3642	3746	105	intron3	3057	4224	1168	exon3	3382	3395	14
orf194	2684	3268	585	intron3	4163	5311	1149	intron3	3747	4896	1150	orf108	3080	3406	327	intron3	3396	4556	1161
orf360	3499	4581	1083	orf337	4163	5176	1014	orf334	3747	4751	1005	exon4	4225	4235	11	orf181	3624	4169	546
exon 4	4781	4887	107	exon4	5312	5322	11	exon4	4897	5043	147	intron4	4236	4807	572	exon4	4557	4785	229
intron 4	4888	6516	1629	intron4	5323	6393	1071	intron4	5044	6326	1283	exon5	4808	4976	169	intron4	4786	5576	791
orf410	4890	6122	1233	orf322	5324	6292	969	exon5	6327	6359	33	intron5	4977	6624	1648	exon5	5577	5670	94
exon 5	6517	6638	122	exon5	6394	6469	76	intron5	6360	7887	1528	orf389	4980	6149	1170	intron5	5671	7460	1790
intron 5	6639	7887	1249	intron5	6470	7541	1072	orf365	6360	7457	1098	exon6	6625	6695	71	orf293	5706	6587	882
orf373	6639	7760	1122	orf341	6470	7495	1026	exon6	7888	7959	72	intron6	6696	8099	1404	exon6	7461	7482	22
exon 6	7888	7992	105	exon6	7542	7601	60	intron6	7960	11761	3802	orf295	6697	7584	888	intron6	7483	8574	1092
intron 6	7993	9103	1111	intron6	7602	8908	1307	orf826	7960	10440	2481	exon7	8100	8253	154	orf325	7484	8461	978
orf323	7993	8964	972	orf346	7602	8642	1041	orf265	10563	11360	798	intron7	8254	9423	1170	exon7	8575	8650	76
exon 7	9104	9190	87	exon7	8909	8941	33	exon7	11762	12379	618	orf155	8263	8730	468	intron7	8651	9297	647
intron 7	9191	10262	1072	intron7	8942	10039	1098	orf154	13759	14223	465	orf195	8748	9335	588	exon8	9298	9311	14
orf341	9191	10216	1026	orf344	8942	9976	1035	nad6	15626	16240	615	exon8	9424	9603	180	intron8	9312	10813	1502
exon 8	10263	10322	60	exon8	10040	10065	26	cox2	19154	22427	3274	intron8	9604	10853	1250	exon9	10814	10892	79
intron 8	10323	11620	1298	intron8	10066	11319	1254	exon1	19154	19541	388	orf309	9604	10533	930	intron9	10893	12574	1682
orf346	10323	11363	1041	exon9	11320	11500	181	intron1	19542	22044	2503	exon9	10854	11138	285	orf366	10998	12098	1101
exon 9	11621	11653	33	intron9	11501	12825	1325	orf789	19544	21913	2370	nad6	14146	14745	600	exon10	12575	12936	362
intron 9	11654	12751	1098	orf317	11501	12454	954	exon2	22045	22427	383	cox2	19136	19897	762	intron10	12937	14202	1266
orf344	11654	12688	1035	exon10	12826	12843	18	orf723	22414	24585	2172	rnl	21385	25068	3684	orf310	12941	13873	933
exon 10	12752	12777	26	intron10	12844	14010	1167	nad1	25652	27101	1450	trnP(tgg)	25558	25630	73	exon11	14203	14245	43
intron 10	12778	14033	1256	orf360	12844	13926	1083	exon1	25652	26334	683	trnD(gtc)	26220	26292	73	intron11	14246	14565	320
exon 11	14034	14078	45	exon11	14011	14147	137	intron1	26335	26800	466	trnM(cat)	26523	26595	73	exon12	14566	14850	285
intron 11	14079	15277	1199	intron11	14148	15460	1313	exon2	26801	27101	301	trnS(tga)	27332	27418	87	nad6	17992	18600	609
orf265	14080	14877	798	orf311	14149	15084	936	atp9	27702	28721	1020	nad2	29217	31022	1806	orf134	20549	20953	405
exon 12	15278	15413	136	exon12	15461	15503	43	exon1	27702	27882	181	nad3	31022	31384	363	cox2	22365	25247	2883
intron 12	15414	16738	1325	intron12	15504	16710	1207	intron1	27883	28680	798	trnR(tct)	32615	32686	72	exon1	22365	22685	321
orf317	15414	16367	954	orf296	15504	16394	891	exon2	28681	28721	41	trnL(taa)	33032	33115	84	intron1	22686	24806	2121
exon 13	16739	16756	18	exon13	16711	16995	285	trnQ(ttg)	29399	29471	73	trnS(gct)	34122	34201	80	orf137	22839	23252	414
intron 13	16757	17918	1162	nad6	22363	22977	615	trnD(gtc)	30519	30591	73	trnE(ttc)	36013	36084	72	exon2	24807	25247	441
orf360	16757	17839	1083	cox2	24606	25379	774	trnK(ttt)	32532	32604	73	atp6	37244	38020	777	rnl	28391	36056	7666
exon 14	17919	18055	137	orf365	25382	26479	1098	nad4L	32973	33260	288	trnR(tcg)	38696	38769	74	exon1	28391	29434	1044
intron 14	18056	18807	752	rnl	26990	34044	7055	nad5	33347	38365	5019	trnN(gtt)	40288	40360	73	intron1	29435	30451	1017
exon 15	18808	18850	43	intron1	28035	30078	2044	exon1	33347	33763	417	rps3	45328	48090	2763	orf222	29620	30288	669
intron 15	18851	20044	1194	orf230	28464	29156	693	intron1	33764	34864	1101	nad1	50278	51294	1017	exon2	30452	32020	1569
exon 16	20045	20329	285	intron2	31611	33079	1469	orf195	34276	34863	588	cob	54248	61344	7097	intron2	32021	33424	1404
nad6	25815	26429	615	orf211	32114	32749	636	exon2	34865	35164	300	exon1	54248	54625	378	orf413	32141	33382	1242
cox2	28975	29748	774	trnP(tgg)	34178	34251	74	intron2	35165	36166	1002	intron1	54626	56027	1402	exon3	33425	34160	736
orf367	29751	30854	1104	trnN(gtt)	35442	35514	73	orf120	35267	35629	363	orf280	54626	55468	843	intron3	34161	34434	274
rnl	31365	39947	8583	trnM(cat)	36728	36800	73	exon3	36167	36403	237	exon2	56028	56042	15	exon4	34435	34573	139
intron 1	32417	33940	1524	trnS(tga)	37102	37189	88	intron3	36404	37321	918	intron2	56043	57572	1530	intron4	34574	35705	1132
orf230	32846	33538	693	trnR(tct)	38239	38310	72	exon4	37322	38365	1044	orf319	56043	57002	960	orf212	34754	35392	639
intron 2	33977	35926	1950	nad2	39021	40826	1806	trnS(gct)	40144	40225	82	exon3	57573	57608	36	exon5	35706	36056	351
orf360	34207	35289	1083	nad3	40826	41188	363	cob	41809	49035	7227	intron3	57609	59472	1864	trnP(tgg)	36616	36688	73
intron 3	37596	38768	1173	orf125	41985	42362	378	exon4	41809	42282	474	orf261	57609	58394	786	trnD(gtc)	37348	37420	73
orf218	37774	38430	657	trnL(taa)	42505	42588	84	intron3	42283	44724	2442	exon4	59473	59639	167	trnM(cat)	37718	37790	73
trnP(tgg)	40075	40148	74	trnE(ttc)	43029	43101	73	orf774	42400	44724	2325	intron4	59640	60785	1146	trnS(tga)	38470	38556	87
trnN(gtt)	41279	41351	73	atp6	43409	44176	768	exon3	44725	44812	88	orf182	60234	60782	549	nad2	40762	42570	1809
trnM(cat)	42581	42653	73	trnR(tcg)	44564	44636	73	intron2	44813	45799	987	exon5	60786	61344	559	nad3	42570	42932	363
trnS(tga)	42969	43056	88	rps3	46420	50802	4383	exon2	45800	46006	207	orf164	63851	64345	495	trnR(tct)	43247	43318	72
trnR(tct)	44036	44107	72	nad1	52901	55119	2219	intron1	46007	48646	2640	trnH(gtg)	65213	65285	73	trnR(tct)	44720	44791	72
nad2	44826	46631	1806	exon1	52901	53053	153	orf220	46827	47489	663	orf115	65732	66079	348	trnL(taa)	45391	45474	84
nad3	46631	46993	363	intron1	53054	54255	1202	exon1	48647	49035	389	nad4	68625	70064	1440	trnS(gct)	46616	46695	80
orf125	48417	48794	378	exon2	54256	55119	864	trnI(gat)	49507	49577	71	orf110	71409	71741	333	trnE(ttc)	48588	48659	72
trnL(taa)	48943	49026	84	trnI(gat)	57594	57664	71	rps3	49992	53834	3843	rns	73318	75447	2130	atp6	50568	51344	777
trnE(ttc)	49467	49539	73	cob	59852	69103	9252	orf111	55086	55421	336	trnV(tac)	76276	76347	72	orf366	51456	52556	1101
atp6	49840	50607	768	exon1	59852	60052	201	trnR(tcg)	56133	56205	73	trnY(gta)	77467	77550	84	trnR(tcg)	53441	53514	74
trnR(tcg)	53069	53141	73	intron1	60053	61669	1617	orf522	57278	58846	1569	trnI(gat)	77934	78004	71	trnN(gtt)	55789	55861	73
rps3	55012	59406	4395	orf261	60734	61519	786	nad3	58849	59244	396	trnC(gca)	78581	78655	75	orf143	57612	58043	432
orf1464	55012	59406	4395	exon2	61670	61861	192	nad2	59244	61160	1917	trnG(tcc)	78977	79047	71	rps3	59973	62660	2688
nad1	61273	63495	2223	intron2	61862	63429	1568	trnL(taa)	62717	62800	84	trnD(gtc)	79687	79759	73	nad1	65407	66423	1017
exon 1	61273	61425	153	exon3	63430	63465	36	trnY(gta)	64479	64562	84	atp8	81655	81813	159	cob	68994	74656	5663
intron 1	61426	62631	1206	intron3	63466	64872	1407	orf122	64904	65272	369	trnL(tag)	82625	82707	83	exon1	68994	69194	201
exon 2	62632	63495	864	orf273	63466	64287	822	trnW(cca)	65323	65395	73	cox3	84519	85346	828	intron1	69195	70448	1254
trnI(gat)	66345	66415	71	orf100	64544	64846	303	trnH(gtg)	65999	66071	73	trnF(gaa)	87301	87372	72	exon2	70449	70629	181
cob	68542	75378	6837	exon4	64873	64955	83	trnE(ttc)	66528	66600	73	trnN(gtt)	88578	88650	73	intron2	70630	72031	1402
exon 1	68542	68742	201	intron4	64956	66039	1084	trnM(cat)	67853	67925	73	trnT(tgt)	89376	89448	73	orf278	70632	71468	837
intron 1	68743	70418	1676	orf319	64957	65916	960	atp6	71142	71930	789	trnW(cca)	89941	90011	71	exon3	72032	72078	47
orf261	69432	70217	786	exon5	66040	66124	85	trnG(tcc)	73002	73072	71	trnA(tgc)	90346	90416	71	intron3	72079	73912	1834
exon 2	70419	70610	192	intron5	66125	67247	1123	trnT(tgt)	73250	73322	73	orf145	91741	92178	438	orf261	72079	72864	786
intron 2	70611	72104	1494	orf183	66692	67243	552	trnF(gaa)	73693	73764	72	source	93080	114236	21157	exon4	73913	74656	744
orf316	70611	71561	951	exon6	67248	67470	223	trnA(tgc)	74115	74185	71	atp9	93164	94880	1717	trnH(gtg)	75172	75244	73
exon 3	72105	72140	36	intron6	67471	68759	1289	trnV(tac)	74589	74660	72	exon1	93164	93344	181	nad4	79205	80644	1440
intron 3	72141	73559	1419	orf112	68337	68675	339	rns	74990	77275	2286	intron1	93345	94839	1495	rns	82361	85526	3166
orf273	72141	72962	822	exon7	68760	69103	344	orf275	77445	78272	828	orf139	94053	94472	420	exon1	82361	83313	953
orf104	73219	73533	315	trnH(gtg)	70028	70100	73	cox3	81006	84813	3808	exon2	94840	94880	41	intron1	83314	84257	944
exon 4	73560	73642	83	nad4	72113	73552	1440	exon3	81006	81179	174	nad4L	97620	97895	276	exon2	84258	85526	1269
intron 4	73643	74726	1084	rns	74765	76819	2055	intron2	81180	82563	1384	nad5	97906	99903	1998	trnV(tac)	86415	86486	72
orf319	73644	74603	960	trnV(tac)	78031	78101	71	exon2	82564	82755	192	trnM(cat)	103235	103307	73	trnY(gta)	87378	87461	84
exon 5	74727	75378	652	trnY(gta)	78989	79072	84	intron1	82756	84369	1614	trnA(tgc)	104116	104186	71	trnI(gat)	87922	87992	71
trnH(gtg)	76302	76374	73	trnC(gca)	80066	80140	75	orf242	83641	84369	729	trnQ(ttg)	108260	108333	74	trnC(gca)	88514	88588	75
nad4	77043	78482	1440	trnG(tcc)	80974	81044	71	exon1	84370	84813	444	trnK(ttt)	109435	109506	72	trnG(tcc)	88969	89039	71
rns	80846	82901	2056	atp8	82185	82343	159	trnL(tag)	85170	85254	85					trnD(gtc)	89843	89915	73
trnV(tac)	84740	84810	71	trnL(tag)	83852	83934	83	atp8	85905	86063	159					orf135	90812	91219	408
trnY(gta)	86205	86288	84	cox3	84854	87672	2819	trnR(tct)	87475	87546	72					atp8	91711	91869	159
trnC(gca)	87293	87367	75	exon1	84854	85490	637	trnS(tga)	88097	88184	88					trnL(tag)	92665	92747	83
trnG(tcc)	88177	88247	71	intron1	85491	87499	2009	trnM(cat)	88931	89003	73					cox3	94329	97144	2816
atp8	89327	89485	159	orf358	85830	86906	1077	trnN(gtt)	89215	89287	73					exon1	94329	94983	655
trnL(tag)	90917	90999	83	exon2	87500	87672	173	orf104	89336	89650	315					intron1	94984	96971	1988
cox3	92018	93566	1549	orf183	87672	88223	552	trnP(tgg)	89896	89968	73					orf392	95200	96378	1179
exon 1	92018	92654	637	trnF(gaa)	90583	90654	72	orf117	92743	93096	354					exon2	96972	97144	173
intron 1	92655	93393	739	trnN(gtt)	91393	91465	73	nad4	96768	98207	1440					trnF(gaa)	99140	99211	72
exon 2	93394	93566	173	trnT(tgt)	92139	92211	73	trnC(gca)	100292	100366	75					trnN(gtt)	100459	100531	73
orf183	93566	94117	552	trnW(cca)	93851	93923	73	rnl	101800	109633	7834					trnT(tgt)	101434	101506	73
trnF(gaa)	96611	96682	72	trnA(tgc)	95419	95489	71	intron1	103131	104807	1677					trnW(cca)	102365	102435	71
trnN(gtt)	97509	97581	73	orf230	97534	98226	693	orf226	103812	104492	681					trnA(tgc)	102788	102858	71
trnT(tgt)	98334	98406	73	trnM(cat)	103540	103612	73	intron2	107151	109309	2159					orf185	103701	104258	558
trnW(cca)	98794	98866	73	atp9	104159	104380	222	orf211	107624	108259	636					trnM(cat)	108297	108369	73
trnA(tgc)	100366	100436	71	nad4L	106343	106618	276	orf353	111479	112540	1062					trnA(tgc)	110325	110395	71
orf234	102479	103183	705	nad5	106629	113571	6943	orf938	113101	115917	2817					orf138	111434	111850	417
orf142	104611	105039	429	exon1	106629	107045	417									atp9	112848	113719	872
trnM(cat)	109532	109604	73	intron1	107046	108065	1020									exon1	112848	113028	181
atp9	111278	111499	222	orf196	107376	107966	591									intron1	113029	113678	650
nad4L	113563	113838	276	exon2	108066	108365	300									exon2	113679	113719	41
nad5	113849	120791	6943	intron2	108366	109364	999									orf114	114007	114351	345
exon 1	113849	114265	417	orf249	108366	109115	750									nad4L	116714	116989	276
intron 1	114266	115285	1020	exon3	109365	109581	217									nad5	117000	121403	4404
orf195	114599	115186	588	intron3	109582	111263	1682									exon1	117000	117716	717
exon 2	115286	115585	300	orf418	109584	110840	1257									intron1	117717	118867	1151
intron 2	115586	116584	999	exon4	111264	111283	20									orf163	117964	118455	492
orf249	115586	116335	750	intron4	111284	112527	1244									exon2	118868	119104	237
exon 3	116585	116801	217	orf252	111559	112317	759									intron2	119105	120353	1249
intron 3	116802	118483	1682	exon5	112528	113571	1044									orf209	119526	120155	630
orf418	116804	118060	1257	trnQ(ttg)	115293	115366	74									exon3	120354	121403	1050
exon 4	118484	118503	20	trnS(gct)	115941	116022	82									trnQ(ttg)	124184	124257	74
intron 4	118504	119747	1244	trnD(gtc)	117845	117917	73									trnK(ttt)	125734	125805	72
orf252	118779	119537	759	trnK(ttt)	118795	118867	73
exon 5	119748	120791	1044
trnQ(ttg)	122643	122716	74
trnS(gct)	123324	123405	82
trnD(gtc)	125109	125181	73
trnK(ttt)	126117	126189	73

## Sheet: Sheet3
Table S3 The composition of five Cyathus mitogenomes
Features	Cyathus striatus AH44044	Cyathus striatus 87405	Cyathus jiayuguanensis 765	Cyathus pallidus QL1	Cyathus stercoreus NPCB004
Length of PCGs (bp)	40923	42216	43062	26343	31938
Length of RNA regions (bp)	7472	7867	8087	7827	8146
Length of intergenic regions (bp)	57849	63539	50102	72054	72054
Length of intronic regions (bp)	14345	14298	14685	8012	17125
Length of mitogenomes (bp)	120589	127920	115936	114236	129263
Length of PCGs (%)	0.339359	0.330019	0.371429	0.230602	0.247078
Length of RNA regions (%)	0.0619625	0.0614994	0.069754	0.0685161	0.0630188
Length of intergenic regions (%)	0.47972	0.496709	0.432152	0.630747	0.557422
Length of intronic regions (%)	0.118958	0.111773	0.126665	0.0701355	0.132482

## Sheet: Sheet4
Table S4 Start and stop codon analyses of 15 core protein-coding genes in 34 Agaricales species
Species	atp6		atp8		atp9		cob		cox1		cox2		cox3		nad1		nad2		nad3		nad4		nad4L		nad5		nad6		rps3
	start codon	stop codon	start codon	stop codon	start codon	stop codon	start codon	stop codon	start codon	stop codon	start codon	stop codon	start codon	stop codon	start codon	stop codon	start codon	stop codon	start codon	stop codon	start codon	stop codon	start codon	stop codon	start codon	stop codon	start codon	stop codon	start codon	stop codon
Agaricus bisporus	ATG	TAA	ATG	TAA	ATG	TAA	ATG	TAG	ATG	TAA	ATG	TAG	ATG	TAA	ATG	TAA	ATG	TAA	ATG	TAA	ATG	TAA	ATG	TAA	ATG	TAA	ATG	TAG	ATG	TAG
Amanita muscaria	ATG	TAG	ATG	TAA	ATG	TAA	ATG	TAA	TTG	TAG	ATG	TAA	ATG	TAA	ATG	TAA	ATG	TAA	ATG	TAA	ATG	TAA	ATG	TAA	ATG	TAA	ATG	TAA	ATG	TAA
Amanita phalloides	ATG	TAA	ATG	TAA	ATG	TAA	ATG	TAA	GTG	TAG	ATG	TAA	ATG	TAA	ATG	TAA	ATG	TAG	ATG	TAA	ATG	TAA	ATG	TAA	ATG	TAA	ATG	TAA	ATG	TAA
Amanita thiersii	ATG	TAA	ATG	TAA	ATG	TAA	ATG	TAA	ATG	TAA	ATG	TAA	ATG	TAA	ATG	TAA	ATG	TAA	ATG	TAG	ATG	TAA	ATG	TAA	ATG	TAA	ATG	TAA	ATG	TAA
Armillaria sinapina	ATG	TAA	ATG	TAA	ATG	TAG	ATG	TAA	ATG	TAA	ATG	TAA	ATG	TAA	ATG	TAA	ATG	TAA	ATG	TAA	ATG	TAA	ATG	TAA	ATG	TAA	ATG	TAA	ATG	TAA
Armillaria solidipes	ATG	TAA	ATG	TAG	ATG	TAA	ATG	TAA	ATG	TAA	ATG	TAA	ATG	TAG	ATG	TAA	ATG	TAA	ATG	TAA	ATG	TAA	ATG	TAA	ATG	TAA	ATG	TAG	ATG	TAG
Asterophora parasitica	ATG	TAG	ATG	TAA	ATG	TAA	ATG	TAA	GTG	TAA	ATG	TAA	ATG	TAA	ATG	TAA	ATG	TAA	ATG	TAA	ATG	TAA	ATG	TAA	ATG	TAG	ATG	TAA	ATG	TAA
Clavaria fumosa	ATG	TAA	ATG	TAA	ATG	TAG	ATG	TAA	ATG	TAA	ATG	TAA	ATG	TAA	ATG	TAA	ATG	TAA	ATG	TAA	ATG	TAA	ATG	TAA	ATG	TAA	ATG	TAA	ATG	TAA
Cyathus pallidus QL1	ATG	TAG	ATG	TAA	ATG	TAA	ATG	TAA	TTG	TAA	ATG	TAA	ATG	TAG	ATG	TAA	ATG	TAA	ATG	TAA	ATG	TAA	ATG	TAA	ATG	TAA	ATG	TAA	ATG	TAA
Cyathus stercoreus NPCB004	ATG	TAA	ATG	TAA	ATG	TAA	ATG	TAG	ATG	TAA	ATG	TAA	ATG	TAG	ATG	TAA	ATG	TAA	ATG	TAA	ATG	TAA	ATG	TAA	ATG	TAA	ATG	TAA	ATG	TAA
Cyathus jiayuguanensis 765	ATG	TAA	ATG	TAG	ATG	TAA	ATG	TAA	TTG	TAA	ATG	TAA	ATG	TAG	ATG	TAA	ATG	TAA	ATG	TAA	ATG	TAA	ATG	TAA	ATG	TAA	ATG	TAG	ATG	TAG
Cyathus striatus 87405	ATG	TAA	ATG	TAG	ATG	TAG	ATG	TAA	ATG	TAA	TTG	TAA	ATG	TAA	ATG	TAA	ATG	TAA	ATG	TAA	ATG	TAA	ATG	TAA	ATG	TAA	ATG	TAA	ATG	TAA
Cyathus striatus AH440044	ATG	TAA	ATG	TAG	ATG	TAG	ATG	TAA	ATG	TAA	TTG	TAA	ATG	TAA	ATG	TAA	ATG	TAA	ATG	TAA	ATG	TAA	ATG	TAA	ATG	TAA	ATG	TAA	ATG	TAA
Flammulina velutipes	ATG	TAA	ATG	TAA	ATG	TAA	ATG	TAA	ATG	TAA	ATG	TAA	ATG	TAA	ATG	TAA	ATG	TAA	ATG	TAA	ATG	TAA	ATG	TAA	ATG	TAA	ATG	TAA	ATG	TAA
Hygrophorus russula	ATG	TAA	ATG	TAA	ATG	TAA	ATG	TAA	GTG	TAA	ATG	TAA	ATG	TAA	ATG	TAA	ATG	TAA	ATG	TAA	ATG	TAA	ATG	TAA	ATG	TAA	ATG	TAA	ATG	TAA
Laccaria amethystina	ATG	TAA	ATG	TAA	ATG	TAA	ATG	TAA	ATG	TAA	ATG	TAA	ATG	TAA	ATG	TAA	ATG	TAA	ATG	TAA	ATG	TAA	ATG	TAA	ATG	TAA	ATG	TAA	ATG	TAA
Laccaria bicolor	ATG	TAA	ATG	TAA	ATG	TAA	ATG	TAA	GTG	TAA	ATG	TAA	ATG	TAA	TTG	TAA	ATG	TAA	ATG	TAA	ATG	TAA	ATG	TAA	ATG	TAA	ATG	TAA	ATG	TAA
Lepista sordida	ATG	TAA	ATG	TAA	ATG	TAA	ATG	TAA	GTG	TAA	ATG	TAG	ATG	TAA	ATG	TAA	ATG	TAA	ATG	TAA	ATG	TAA	ATG	TAA	ATG	TAA	ATG	TAA	ATG	TAA
Leucoagaricus naucinus	ATG	TAA	ATG	TAA	ATG	TAA	ATG	TAA	ATG	TAA	ATG	TAA	ATG	TAA	ATG	TAG	ATG	TAA	ATG	TAA	ATG	TAA	ATG	TAA	ATG	TAA	ATG	TAA	ATG	TAA
Lyophyllum decastes	ATG	TAA	ATG	TAA	ATG	TAA	ATG	TAA	GTG	TAA	ATG	TAA	ATG	TAA	ATG	TAA	ATG	TAA	ATG	TAA	ATG	TAA	ATG	TAA	ATG	TAA	ATG	TAA	ATG	TAA
Lyophyllum shimeji	ATG	TAA	ATG	TAA	ATG	TAA	ATG	TAA	GTG	TAG	ATG	TAA	ATG	TAA	ATG	TAA	ATG	TAA	ATG	TAA	ATG	TAA	ATG	TAA	ATG	TAA	ATG	TAA	ATG	TAA
Macrolepiota fuliginosa	ATG	TAA	ATG	TAG	ATG	TAA	ATG	TAA	ATG	TAA	ATG	TAA	ATG	TAA	ATG	TAA	ATG	TAA	ATG	TAA	ATG	TAG	ATG	TAA	ATG	TAA	ATG	TAA	ATG	TAG
Marasmiellus scandens	ATG	TAA	ATG	TAA	ATG	TAG	ATG	TAG	ATG	TAA	ATG	TAA	ATG	TAG	ATG	TAA	ATG	TAA	ATG	TAA	ATG	TAG	ATG	TAA	ATG	TAA	ATG	TAA	ATG	TAA
Marasmius tenuissimus	GTG	TAA	ATG	TAA	ATG	TAA	ATG	TAA	ATG	TAA	ATG	TAA	ATG	TAA	ATG	TAA	ATG	TAA	ATG	TAA	ATG	TAA	ATG	TAA	ATG	TAA	ATG	TAA	ATG	TAA
Moniliophthora roreri	ATG	TAG	ATG	TAA	ATG	TAA	ATG	TAA	ATG	TAA	ATG	TAG	ATG	TAG	ATG	TAA	ATG	TAA	ATG	TAA	ATG	TAA	ATG	TAA	ATG	TAA	ATG	TAA	ATG	TAA
Myochromella boudieri	ATG	TAA	ATG	TAA	ATG	TAA	ATG	TAA	ATG	TAA	ATG	TAA	ATG	TAA	ATG	TAA	ATG	TAA	ATG	TAA	ATG	TAA	ATG	TAA	ATG	TAA	ATG	TAA	ATG	TAA
Omphalotus japonicus	ATG	TAA	ATG	TAA	ATG	TAA	ATG	TAA	ATG	TAA	ATG	TAA	ATG	TAG	ATG	TAA	ATG	TAA	ATG	TAA	ATG	TAA	ATG	TAA	ATG	TAA	ATG	TAA	ATG	TAA
Pleurotus ostreatus	ATG	TAA	ATG	TAG	ATG	TAA	ATG	TAA	GTG	TAA	ATG	TAG	ATG	TAG	ATG	TAA	ATG	TAA	ATG	TAA	ATG	TAA	ATG	TAA	ATG	TAA	ATG	TAA	ATG	TAG
Pleurotus platypus	ATG	TAA	ATG	TAG	ATG	TAA	ATG	TAA	GTG	TAA	ATG	TAA	ATG	TAG	ATG	TAA	ATG	TAA	ATG	TAA	ATG	TAA	ATG	TAA	ATG	TAA	ATG	TAA	ATG	TAG
Schizophyllum commune	ATG	TAA	ATG	TAA	ATG	TAA	ATG	TAA	ATG	TAA	ATG	TAA	ATG	TAA	ATG	TAG	ATG	TAA	ATG	TAA	ATG	TAA	ATG	TAA	ATG	TAA	ATG	TAA	ATG	TAA
Stropharia rugosoannulata	ATG	TAA	ATG	TAA	ATG	TAA	ATG	TAA	TTG	TAG	ATG	TAA	ATG	TAG	ATG	TAA	ATG	TAA	ATG	TAA	TTG	TAA	ATG	TAA	ATG	TAA	TTG	TAG	GTG	TAG
Tricholoma bakamatsutake	ATG	TAA	ATG	TAA	ATG	TAA	ATG	TAA	GTG	TAA	ATG	TAA	ATG	TAA	/	/	ATG	TAA	ATG	TAA	ATG	TAA	ATG	TAA	ATG	TAA	ATG	TAA	ATG	TAA
Tricholoma matsutake	ATG	TAA	ATG	TAA	ATG	TAA	ATG	TAA	GTG	TAA	ATG	TAA	ATG	TAA	ATG	TAA	ATG	TAA	ATG	TAA	ATG	TAA	ATG	TAA	ATG	TAA	ATG	TAA	ATG	TAA
Volvariella volvacea	ATG	TAA	ATG	TAA	ATG	TAA	ATG	TAA	ATG	TAA	ATG	TAA	ATG	TAA	ATG	TAA	ATG	TAA	ATG	TAA	ATG	TAG	ATG	TAA	ATG	TAA	ATG	TAA	ATG	TAA

## Sheet: Sheet5
Table S5 Codon usage analysis (RSCU and Numbers) of 34 Agaricales species
		Abis		Amus		Apar		Apha		Asin		Asol		Athi		Cfum		Cpal		Cste		Cjia		Cstr_C8		Cstr_A4		Fvel		Hrus		Lame		Lbic		Ldec		Lnau		Lshi		Lsor		Mbou		Mful		Mror
AA	Codon	Number	RSCU	Number	RSCU	Number	RSCU	Number	RSCU	Number	RSCU	Number	RSCU	Number	RSCU	Number	RSCU	Number	RSCU	Number	RSCU	Number	RSCU	Number	RSCU	Number	RSCU	Number	RSCU	Number	RSCU	Number	RSCU	Number	RSCU	Number	RSCU	Number	RSCU	Number	RSCU	Number	RSCU	Number	RSCU	Number	RSCU	Number	RSCU
Ala	GCA	194	1.1429	123	1.1284	92	1.1152	155	1.1481	170	1.124	176	1.0507	171	1.3282	282	1.1314	99	0.934	108	0.9172	190	1.1293	131	0.8465	127	0.8314	79	1.0032	91	1.1304	97	1.0402	134	1.1652	104	1.2128	146	1.2641	145	1.124	99	1.2571	161	1.1625	139	1.1098	208	1.4222
Ala	GCC	85	0.5007	22	0.2018	20	0.2424	27	0.2	71	0.4694	81	0.4836	48	0.3728	55	0.2207	54	0.5094	65	0.552	103	0.6122	92	0.5945	90	0.5892	19	0.2413	20	0.2484	40	0.429	42	0.3652	21	0.2449	28	0.2424	37	0.2868	14	0.1778	64	0.4621	33	0.2635	30	0.2051
Ala	GCG	46	0.271	6	0.055	21	0.2545	13	0.0963	37	0.2446	50	0.2985	21	0.1631	27	0.1083	17	0.1604	17	0.1444	51	0.3031	50	0.3231	54	0.3535	7	0.0889	8	0.0994	8	0.0858	10	0.087	4	0.0466	13	0.1126	27	0.2093	3	0.0381	33	0.2383	18	0.1437	26	0.1778
Ala	GCU	354	2.0854	285	2.6147	197	2.3879	345	2.5556	327	2.162	363	2.1672	275	2.1359	633	2.5396	254	2.3962	281	2.3864	329	1.9554	346	2.2359	340	2.2259	210	2.6667	203	2.5217	228	2.445	274	2.3826	214	2.4956	275	2.381	307	2.3798	199	2.527	296	2.1372	311	2.483	321	2.1949
Cys	UGC	74	0.6407	5	0.1449	7	0.3256	10	0.2	12	0.192	22	0.3056	16	0.3048	40	0.25	22	0.6197	20	0.4545	30	0.3947	24	0.3664	21	0.336	1	0.0256	6	0.3	6	0.2308	16	0.4103	6	0.2727	19	0.4872	18	0.4615	8	0.2963	26	0.4561	20	0.6061	27	0.4122
Cys	UGU	157	1.3593	64	1.8551	36	1.6744	90	1.8	113	1.808	122	1.6944	89	1.6952	280	1.75	49	1.3803	68	1.5455	122	1.6053	107	1.6336	104	1.664	77	1.9744	34	1.7	46	1.7692	62	1.5897	38	1.7273	59	1.5128	60	1.5385	46	1.7037	88	1.5439	46	1.3939	104	1.5878
Asp	GAC	77	0.3362	32	0.1808	12	0.1644	38	0.1484	68	0.2547	97	0.3374	41	0.2265	117	0.1697	43	0.3772	57	0.3677	104	0.4379	51	0.2434	39	0.195	21	0.1433	9	0.0909	20	0.1887	41	0.2671	6	0.0779	17	0.1273	28	0.1958	6	0.0603	53	0.2865	20	0.1778	45	0.1903
Asp	GAU	381	1.6638	322	1.8192	134	1.8356	474	1.8516	466	1.7453	478	1.6626	321	1.7735	1262	1.8303	185	1.6228	253	1.6323	371	1.5621	368	1.7566	361	1.805	272	1.8567	189	1.9091	192	1.8113	266	1.7329	148	1.9221	250	1.8727	258	1.8042	193	1.9397	317	1.7135	205	1.8222	428	1.8097
Glu	GAA	472	1.636	317	1.791	123	1.6291	483	1.7955	432	1.6457	503	1.5968	355	1.715	1371	1.7933	242	1.7348	296	1.649	435	1.5564	414	1.656	382	1.605	257	1.8489	182	1.8667	212	1.8678	282	1.7407	148	1.7619	263	1.8076	249	1.5611	197	1.8157	323	1.5381	191	1.6255	424	1.7062
Glu	GAG	105	0.364	37	0.209	28	0.3709	55	0.2045	93	0.3543	127	0.4032	59	0.285	158	0.2067	37	0.2652	63	0.351	124	0.4436	86	0.344	94	0.395	21	0.1511	13	0.1333	15	0.1322	42	0.2593	20	0.2381	28	0.1924	70	0.4389	20	0.1843	97	0.4619	44	0.3745	73	0.2938
Phe	UUC	308	0.5641	200	0.5865	137	0.5918	227	0.4892	211	0.4642	240	0.4541	214	0.5487	287	0.2304	235	0.6902	246	0.6373	295	0.7057	259	0.5144	258	0.5212	61	0.1519	97	0.3935	84	0.3188	110	0.3411	139	0.578	205	0.6879	162	0.4557	131	0.5293	149	0.3989	202	0.7652	206	0.4031
Phe	UUU	784	1.4359	482	1.4135	326	1.4082	701	1.5108	698	1.5358	817	1.5459	566	1.4513	2204	1.7696	446	1.3098	526	1.3627	541	1.2943	748	1.4856	732	1.4788	742	1.8481	396	1.6065	443	1.6812	535	1.6589	342	1.422	391	1.3121	549	1.5443	364	1.4707	598	1.6011	326	1.2348	816	1.5969
Gly	GGA	321	1.5697	212	1.7593	154	1.765	314	1.8859	233	1.3547	255	1.2702	296	1.9159	632	1.7256	230	2.0309	254	1.8642	334	1.6555	300	1.7316	285	1.6546	183	1.7639	131	1.4929	156	1.5522	184	1.4403	156	1.8407	197	1.501	209	1.6522	150	1.7857	238	1.5016	187	1.5455	303	1.7489
Gly	GGC	48	0.2347	4	0.0332	3	0.0344	6	0.036	45	0.2616	58	0.2889	15	0.0971	52	0.142	11	0.0971	21	0.1541	41	0.2032	30	0.1732	33	0.1916	4	0.0386	5	0.057	3	0.0299	33	0.2583	4	0.0472	14	0.1067	22	0.1739	2	0.0238	26	0.164	18	0.1488	25	0.1443
Gly	GGG	77	0.3765	22	0.1826	20	0.2292	28	0.1682	82	0.4767	112	0.5579	25	0.1618	83	0.2266	35	0.3091	48	0.3523	101	0.5006	68	0.3925	71	0.4122	16	0.1542	11	0.1254	28	0.2786	31	0.2427	11	0.1298	32	0.2438	43	0.3399	15	0.1786	59	0.3722	53	0.438	34	0.1962
Gly	GGU	372	1.8191	244	2.0249	172	1.9713	318	1.9099	328	1.907	378	1.8829	282	1.8252	698	1.9058	177	1.5629	222	1.6294	331	1.6406	295	1.7027	300	1.7417	212	2.0434	204	2.3248	215	2.1393	263	2.0587	168	1.9823	282	2.1486	232	1.834	169	2.0119	311	1.9621	226	1.8678	331	1.9105
His	CAC	98	0.6689	28	0.3636	29	0.5472	36	0.338	66	0.5116	72	0.5373	43	0.366	71	0.2347	48	0.6667	67	0.6569	100	0.6944	74	0.5606	67	0.5255	11	0.1384	13	0.2301	29	0.4203	45	0.5085	24	0.4752	66	0.7543	33	0.4342	35	0.6604	79	0.69	51	0.7234	64	0.5378
His	CAU	195	1.3311	126	1.6364	77	1.4528	177	1.662	192	1.4884	196	1.4627	192	1.634	534	1.7653	96	1.3333	137	1.3431	188	1.3056	190	1.4394	188	1.4745	148	1.8616	100	1.7699	109	1.5797	132	1.4915	77	1.5248	109	1.2457	119	1.5658	71	1.3396	150	1.31	90	1.2766	174	1.4622
Ile	AUA	706	1.2829	489	1.2338	284	1.3028	602	1.1735	617	1.2414	626	1.1871	493	1.1804	1865	1.3152	322	1.0343	406	1.1205	506	1.1439	421	0.9321	407	0.9236	503	1.2502	352	1.3401	354	1.2524	432	1.245	305	1.2851	467	1.4732	469	1.3362	299	1.1834	516	1.3567	378	1.4282	737	1.3114
Ile	AUC	215	0.3907	94	0.2372	56	0.2569	141	0.2749	135	0.2716	160	0.3034	129	0.3089	234	0.165	201	0.6456	190	0.5244	236	0.5335	224	0.4959	219	0.497	65	0.1616	43	0.1637	81	0.2866	109	0.3141	55	0.2317	72	0.2271	78	0.2222	48	0.19	113	0.2971	91	0.3438	110	0.1957
Ile	AUU	730	1.3265	606	1.529	314	1.4404	796	1.5517	739	1.4869	796	1.5095	631	1.5108	2155	1.5197	411	1.3201	491	1.3551	585	1.3225	710	1.572	696	1.5794	639	1.5882	393	1.4962	413	1.4611	500	1.4409	352	1.4831	412	1.2997	506	1.4416	411	1.6266	512	1.3462	325	1.228	839	1.4929
Lys	AAA	1054	1.6456	581	1.8415	219	1.7878	907	1.8379	981	1.7226	1126	1.7152	724	1.7833	3123	1.8247	530	1.7936	614	1.6868	890	1.639	999	1.7314	942	1.7065	608	1.8737	262	1.8648	351	1.8093	488	1.7491	261	1.8982	522	1.7846	473	1.7231	284	1.8502	748	1.7831	346	1.7343	867	1.7766
Lys	AAG	227	0.3544	50	0.1585	26	0.2122	80	0.1621	158	0.2774	187	0.2848	88	0.2167	300	0.1753	61	0.2064	114	0.3132	196	0.361	155	0.2686	162	0.2935	41	0.1263	19	0.1352	37	0.1907	70	0.2509	14	0.1018	63	0.2154	76	0.2769	23	0.1498	91	0.2169	53	0.2657	109	0.2234
Leu	CUA	250	0.7306	118	0.538	78	0.5429	173	0.5626	152	0.5296	177	0.5353	151	0.6358	349	0.4995	144	0.6863	154	0.6493	294	0.9955	175	0.5912	165	0.569	49	0.2346	58	0.3862	59	0.3536	98	0.4896	92	0.6374	113	0.5678	164	0.7942	62	0.3979	148	0.615	109	0.6533	199	0.6532
Leu	CUC	36	0.1052	8	0.0365	2	0.0139	13	0.0423	31	0.108	36	0.1089	10	0.0421	22	0.0315	23	0.1096	25	0.1054	54	0.1828	41	0.1385	43	0.1483	2	0.0096	4	0.0266	5	0.03	3	0.015	6	0.0416	3	0.0151	22	0.1065	2	0.0128	30	0.1247	2	0.012	19	0.0624
Leu	CUG	67	0.1958	14	0.0638	12	0.0835	28	0.0911	27	0.0941	46	0.1391	20	0.0842	52	0.0744	35	0.1668	46	0.194	71	0.2404	63	0.2128	51	0.1759	7	0.0335	6	0.04	10	0.0599	19	0.0949	4	0.0277	10	0.0503	19	0.092	6	0.0385	40	0.1662	27	0.1618	31	0.1018
Leu	CUU	237	0.6926	124	0.5653	65	0.4524	187	0.6081	172	0.5993	250	0.756	141	0.5937	478	0.6842	170	0.8102	196	0.8264	220	0.7449	224	0.7568	215	0.7414	105	0.5028	103	0.6859	74	0.4436	91	0.4546	66	0.4573	67	0.3367	120	0.5811	73	0.4684	143	0.5942	76	0.4555	220	0.7221
Leu	UUA	1283	3.7496	997	4.5456	680	4.7332	1349	4.387	1183	4.122	1278	3.8649	1024	4.3116	2995	4.2867	841	4.0079	923	3.8918	1006	3.4063	1165	3.9358	1158	3.9931	1043	4.9944	699	4.6548	819	4.9091	931	4.6511	677	4.6905	936	4.7035	855	4.1404	757	4.8578	1006	4.1801	738	4.4236	1256	4.1225
Leu	UUG	180	0.5261	55	0.2508	25	0.174	95	0.3089	157	0.547	197	0.5958	79	0.3326	296	0.4237	46	0.2192	79	0.3331	127	0.43	108	0.3649	108	0.3724	47	0.2251	31	0.2064	34	0.2038	59	0.2948	21	0.1455	65	0.3266	59	0.2857	35	0.2246	77	0.3199	49	0.2937	103	0.3381
Met	AUG	268	1	176	1	98	1	231	1	232	1	257	1	240	1	584	1	152	1	175	1	241	1	244	1	237	1	168	1	130	1	138	1	179	1	107	1	158	1	160	1	122	1	199	1	141	1	241	1
Asn	AAC	232	0.4249	83	0.2274	27	0.1667	122	0.2208	201	0.3658	199	0.339	104	0.2674	326	0.2053	136	0.4459	173	0.4413	222	0.4405	194	0.3667	196	0.3798	43	0.0965	39	0.1557	40	0.1533	78	0.2311	26	0.1405	104	0.321	64	0.2211	35	0.1351	144	0.3614	71	0.3205	129	0.2452
Asn	AAU	860	1.5751	647	1.7726	297	1.8333	983	1.7792	898	1.6342	975	1.661	674	1.7326	2850	1.7947	474	1.5541	611	1.5587	786	1.5595	864	1.6333	836	1.6202	848	1.9035	462	1.8443	482	1.8467	597	1.7689	344	1.8595	544	1.679	515	1.7789	483	1.8649	653	1.6386	372	1.6795	923	1.7548
Pro	CCA	147	1.1053	93	1.1553	70	1.3023	102	1.0226	113	0.9679	111	0.8362	107	1.0946	299	1.2524	44	0.5714	62	0.6776	130	1.0039	89	0.8054	78	0.6903	57	1.0088	71	1.3209	54	0.871	92	1.1572	78	1.5	108	1.3981	98	1.2405	67	1.3958	87	0.8878	99	1.2692	123	1.0649
Pro	CCC	43	0.3233	16	0.1988	6	0.1116	16	0.1604	59	0.5054	71	0.5348	18	0.1841	47	0.1969	9	0.1169	25	0.2732	52	0.4015	41	0.371	38	0.3363	4	0.0708	2	0.0372	13	0.2097	24	0.3019	4	0.0769	11	0.1424	20	0.2532	9	0.1875	41	0.4184	34	0.4359	24	0.2078
Pro	CCG	46	0.3459	11	0.1366	7	0.1302	12	0.1203	28	0.2398	27	0.2034	15	0.1535	24	0.1005	8	0.1039	14	0.153	34	0.2625	33	0.2986	35	0.3097	7	0.1239	3	0.0558	18	0.2903	11	0.1384	3	0.0577	15	0.1942	12	0.1519	4	0.0833	23	0.2347	4	0.0513	14	0.1212
Pro	CCU	296	2.2256	202	2.5093	132	2.4558	269	2.6967	267	2.2869	322	2.4256	251	2.5678	585	2.4503	247	3.2078	265	2.8962	302	2.332	279	2.5249	301	2.6637	158	2.7965	139	2.586	163	2.629	191	2.4025	123	2.3654	175	2.2654	186	2.3544	112	2.3333	241	2.4592	175	2.2436	301	2.6061
Gln	CAA	382	1.6255	222	1.8423	122	1.8074	304	1.848	294	1.7093	327	1.6987	256	1.7534	780	1.8118	171	1.7273	238	1.619	293	1.5795	309	1.6306	313	1.6093	171	1.8895	143	1.9067	178	1.8446	225	1.7176	130	1.9259	192	1.8824	187	1.7642	134	1.942	237	1.6632	176	1.6526	288	1.6941
Gln	CAG	88	0.3745	19	0.1577	13	0.1926	25	0.152	50	0.2907	58	0.3013	36	0.2466	81	0.1882	27	0.2727	56	0.381	78	0.4205	70	0.3694	76	0.3907	10	0.1105	7	0.0933	15	0.1554	37	0.2824	5	0.0741	12	0.1176	25	0.2358	4	0.058	48	0.3368	37	0.3474	52	0.3059
Arg	AGA	392	3.8684	194	4.9744	115	4.6	258	4.7339	277	3.9014	301	3.7941	263	4.4078	697	4.096	188	4.9474	251	4.6055	423	4.2655	321	4.133	304	4.1549	155	4.7938	117	4.875	156	5.0053	188	4.7197	112	5.1692	174	4.9014	170	4.0157	120	5	270	3.9036	140	4.0976	270	4.4142
Arg	AGG	96	0.9474	7	0.1795	18	0.72	10	0.1835	33	0.4648	36	0.4538	25	0.419	55	0.3232	4	0.1053	12	0.2202	46	0.4639	24	0.309	22	0.3007	8	0.2474	2	0.0833	4	0.1283	11	0.2762	3	0.1385	12	0.338	11	0.2598	3	0.125	30	0.4337	16	0.4683	28	0.4578
Arg	CGA	60	0.5921	22	0.5641	8	0.32	37	0.6789	38	0.5352	45	0.5672	44	0.7374	126	0.7405	17	0.4474	34	0.6239	63	0.6353	69	0.8884	59	0.8064	7	0.2165	18	0.75	16	0.5134	23	0.5774	10	0.4615	21	0.5915	33	0.7795	9	0.375	51	0.7373	29	0.8488	37	0.6049
Arg	CGC	9	0.0888	1	0.0256	4	0.16	3	0.055	18	0.2535	19	0.2395	3	0.0503	21	0.1234	2	0.0526	6	0.1101	14	0.1412	7	0.0901	6	0.082	2	0.0619	1	0.0417	2	0.0642	4	0.1004	1	0.0462	0	0	7	0.1654	0	0	18	0.2602	3	0.0878	9	0.1471
Arg	CGG	24	0.2368	1	0.0256	4	0.16	6	0.1101	16	0.2254	22	0.2773	8	0.1341	12	0.0705	4	0.1053	10	0.1835	12	0.121	14	0.1803	13	0.1777	3	0.0928	0	0	1	0.0321	5	0.1255	0	0	0	0	5	0.1181	6	0.25	10	0.1446	7	0.2049	6	0.0981
Arg	CGU	27	0.2664	9	0.2308	1	0.04	13	0.2385	44	0.6197	53	0.6681	15	0.2514	110	0.6464	13	0.3421	14	0.2569	37	0.3731	31	0.3991	35	0.4784	19	0.5876	6	0.25	8	0.2567	8	0.2008	4	0.1846	6	0.169	28	0.6614	6	0.25	36	0.5205	10	0.2927	17	0.2779
Ser	AGC	134	0.571	14	0.1062	16	0.1901	36	0.1923	60	0.3264	68	0.3218	45	0.2824	86	0.1855	57	0.4436	80	0.5246	94	0.4768	74	0.3734	75	0.393	4	0.0331	8	0.0878	21	0.2049	48	0.34	18	0.2139	50	0.3851	54	0.3781	15	0.1544	72	0.4495	44	0.3771	72	0.3303
Ser	AGU	370	1.5767	222	1.6839	136	1.6158	286	1.528	304	1.6537	340	1.6088	268	1.682	675	1.4563	240	1.8677	252	1.6525	375	1.9019	377	1.9024	362	1.8969	219	1.8149	144	1.5795	180	1.7561	255	1.8064	130	1.5446	221	1.7022	225	1.5753	179	1.8422	248	1.5484	196	1.68	336	1.5413
Ser	UCA	323	1.3764	206	1.5626	126	1.497	282	1.5067	237	1.2892	265	1.2539	232	1.4561	674	1.4542	100	0.7782	130	0.8525	237	1.202	177	0.8932	176	0.9223	150	1.2431	167	1.8318	128	1.2488	180	1.2751	131	1.5564	208	1.6021	189	1.3232	147	1.5129	193	1.205	179	1.5343	332	1.5229
Ser	UCC	86	0.3665	27	0.2048	25	0.297	53	0.2832	76	0.4134	99	0.4685	33	0.2071	105	0.2265	36	0.2802	35	0.2295	99	0.5021	71	0.3583	67	0.3511	30	0.2486	12	0.1316	18	0.1756	41	0.2904	17	0.202	20	0.154	40	0.28	10	0.1029	65	0.4058	20	0.1714	63	0.289
Ser	UCG	57	0.2429	10	0.0759	5	0.0594	20	0.1069	35	0.1904	45	0.2129	26	0.1632	62	0.1338	15	0.1167	26	0.1705	31	0.1572	33	0.1665	30	0.1572	6	0.0497	5	0.0548	8	0.078	18	0.1275	4	0.0475	19	0.1463	17	0.119	6	0.0617	28	0.1748	14	0.12	28	0.1284
Ser	UCU	438	1.8665	312	2.3666	197	2.3406	446	2.3829	391	2.1269	451	2.1341	352	2.2092	1179	2.5437	323	2.5136	392	2.5705	347	1.7599	457	2.3061	435	2.2795	315	2.6105	211	2.3144	260	2.5366	305	2.1606	205	2.4356	261	2.0103	332	2.3244	226	2.3259	355	2.2164	247	2.1171	477	2.1881
Thr	ACA	321	1.5035	212	1.5588	130	1.8056	224	1.3215	290	1.5487	282	1.4369	191	1.338	602	1.5377	142	1.2679	216	1.4922	306	1.4167	304	1.5751	276	1.5462	147	1.4067	147	1.6657	181	1.7659	209	1.5985	145	1.9863	239	2.0169	198	1.5777	175	2.029	249	1.5587	187	1.7477	260	1.5663
Thr	ACC	87	0.4075	43	0.3162	19	0.2639	46	0.2714	69	0.3685	78	0.3975	36	0.2522	88	0.2248	29	0.2589	32	0.2211	89	0.412	83	0.4301	74	0.4146	16	0.1531	9	0.102	23	0.2244	47	0.3595	6	0.0822	14	0.1181	32	0.255	2	0.0232	75	0.4695	17	0.1589	31	0.1867
Thr	ACG	39	0.1827	14	0.1029	5	0.0694	18	0.1062	37	0.1976	39	0.1987	12	0.0841	52	0.1328	21	0.1875	33	0.228	42	0.1944	53	0.2746	47	0.2633	9	0.0861	4	0.0453	10	0.0976	23	0.1759	3	0.0411	14	0.1181	21	0.1673	3	0.0348	39	0.2441	14	0.1308	14	0.0843
Thr	ACU	407	1.9063	275	2.0221	134	1.8611	390	2.3009	353	1.8852	386	1.9669	332	2.3257	824	2.1047	256	2.2857	298	2.0587	427	1.9769	332	1.7202	317	1.7759	246	2.3541	193	2.187	196	1.9122	244	1.8662	138	1.8904	207	1.7468	251	2	165	1.913	276	1.7277	210	1.9626	359	2.1627
Val	GUA	407	1.9312	272	2.1935	180	2.1053	308	1.9649	278	1.621	306	1.6021	312	2.0835	636	1.8184	179	1.7379	227	1.71	362	2	306	1.7362	279	1.6909	165	1.6337	164	2.0061	178	1.8886	226	1.8487	180	2.2086	262	2.2298	259	2.1317	199	2.3072	267	1.8446	247	2.2609	341	2.0178
Val	GUC	39	0.1851	8	0.0645	16	0.1871	16	0.1021	44	0.2566	52	0.2723	21	0.1402	44	0.1258	32	0.3107	37	0.2787	55	0.3039	51	0.2894	50	0.303	6	0.0594	2	0.0245	12	0.1273	24	0.1963	10	0.1227	6	0.0511	13	0.107	2	0.0232	35	0.2418	11	0.1007	15	0.0888
Val	GUG	73	0.3464	26	0.2097	25	0.2924	36	0.2297	69	0.4023	83	0.4346	37	0.2471	86	0.2459	38	0.3689	47	0.354	58	0.3204	71	0.4028	70	0.4242	16	0.1584	21	0.2569	31	0.3289	61	0.499	18	0.2209	27	0.2298	47	0.3868	16	0.1855	57	0.3938	21	0.1922	28	0.1657
Val	GUU	324	1.5374	190	1.5323	121	1.4152	267	1.7033	295	1.7201	323	1.6911	229	1.5292	633	1.8099	163	1.5825	220	1.6573	249	1.3757	277	1.5716	261	1.5818	217	2.1485	140	1.7125	156	1.6552	178	1.456	118	1.4479	175	1.4894	167	1.3745	128	1.4841	220	1.5199	158	1.4462	292	1.7278
Trp	UGA	83	0.6946	5	0.102	1	0.0328	7	0.1167	115	1.4375	129	1.3871	11	0.1719	317	1.5314	24	0.4324	22	0.3577	45	0.5028	24	0.3221	30	0.4255	90	1.8	9	0.2609	9	0.2195	21	0.4158	0	0	10	0.2	2	0.0449	2	0.0702	21	0.3529	1	0.0233	137	1.5568
Trp	UGG	156	1.3054	93	1.898	60	1.9672	113	1.8833	45	0.5625	57	0.6129	117	1.8281	97	0.4686	87	1.5676	101	1.6423	134	1.4972	125	1.6779	111	1.5745	10	0.2	60	1.7391	73	1.7805	80	1.5842	61	2	90	1.8	87	1.9551	55	1.9298	98	1.6471	85	1.9767	39	0.4432
Tyr	UAC	199	0.466	53	0.2255	37	0.2741	86	0.2522	110	0.3226	143	0.3629	97	0.3294	167	0.1845	101	0.4509	126	0.4782	192	0.5845	137	0.3876	135	0.3988	26	0.1074	32	0.2112	37	0.2056	100	0.4115	39	0.2806	76	0.3283	81	0.3724	23	0.1518	120	0.4233	67	0.3807	95	0.2794
Tyr	UAU	655	1.534	417	1.7745	233	1.7259	596	1.7478	572	1.6774	645	1.6371	492	1.6706	1643	1.8155	347	1.5491	401	1.5218	465	1.4155	570	1.6124	542	1.6012	458	1.8926	271	1.7888	323	1.7944	386	1.5885	239	1.7194	387	1.6717	354	1.6276	280	1.8482	447	1.5767	285	1.6193	585	1.7206
[truncated: 20 more columns]

## Sheet: Sheet6
Table S6 GC content and codon frequency analysis of 34 Agaricales mitogenomes
Species	GC content of CDS	GC content of intronic regions	usage of AT-rich codons	usage of GC-rich codons	GC content	AT content		usage of AT-rich codons	usage of GC-rich codons	GC content	AT content
Agaricus bisporus	0.2839	0.3046	0.787402	0.212598	0.2907	0.7093	usage of AT-rich codons	1	-1	-0.85	0.85
Amanita muscaria	0.248	0.251	0.830279	0.169721	0.2373	0.7627	usage of GC-rich codons	-1	1	0.85	-0.85
Asterophora parasitica	0.2707	0.2572	0.790483	0.209517	0.3173	0.6827	GC content	-0.85	0.85	1	-1
Amanita phalloides	0.2435	0.2622	0.835792	0.164208	0.2456	0.7544	AT content	0.85	-0.85	-1	1
Armillaria sinapina	0.2695	0.2924	0.805398	0.194602	0.285	0.715
Armillaria solidipes	0.2758	0.2969	0.79622	0.20378	0.2918	0.7082	Pearson correlation coefficients (r) are shown in the table.
Amanita thiersii	0.2659	0.2603	0.810087	0.189913	0.24	0.76	AT-rich codons indicate that the number of A and T in the codon is greater than or equal to 2.
Clavaria fumosa	0.2228	0.2278	0.86111	0.13889	0.1974	0.8026	GC-rich codons indicate that the number of G and C in the codon is greater than or equal to 2.
Cyathus pallidus QL1	0.2771	0.2738	0.797143	0.202857	0.277	0.723
Cyathus stercoreus NPCB004	0.2827	0.2968	0.794306	0.205694	0.2949	0.7051	usage of AT-rich codons	0	0	1.59689e-10	1.59689e-10
Cyathus jiayuguanensis 765	0.3085	0.2813	0.767447	0.232553	0.3012	0.6988	usage of GC-rich codons	0	0	1.59689e-10	1.59689e-10
Cyathus striatus 87405	0.2787	0.2963	0.795495	0.204505	0.2732	0.7268	GC content	1.59689e-10	1.59689e-10	0	0
Cyathus striatus AH44044	0.2794	0.2961	0.79394	0.20606	0.2734	0.7266	AT content	1.59689e-10	1.59689e-10	0	0
Flammulina velutipes	0.2	0.1808	0.875623	0.124377	0.1654	0.8346
Hygrophorus russula	0.2448	0.2688	0.829777	0.170223	0.1913	0.8087	P-values are shown in the table.
Laccaria amethystina	0.2539	0.2498	0.815068	0.184932	0.2339	0.7661
Laccaria bicolor	0.2681	0.2983	0.800021	0.199979	0.2832	0.7168
Lyophyllum decastes	0.2559	/	0.810857	0.189143	0.2227	0.7773
Leucoagaricus naucinus	0.2649	0.2672	0.806531	0.193469	0.2607	0.7393
Lyophyllum shimeji	0.2752	0.3283	0.790623	0.209377	0.2794	0.7206
Lepista sordida	0.2415	0.3135	0.83676	0.16324	0.2604	0.7396
Myochromella boudieri	0.2849	0.3005	0.792119	0.207881	0.2794	0.7206
Macrolepiota fuliginosa	0.2975	0.3319	0.76739	0.23261	0.3634	0.6366
Moniliophthora roreri	0.2518	0.2861	0.827031	0.172969	0.2763	0.7237
Marasmiellus scandens	0.2756	0.3307	0.794668	0.205332	0.3204	0.6796
Marasmius tenuissimus	0.2534	0.2427	0.821837	0.178163	0.2704	0.7296
Omphalotus japonicus	0.2627	0.3086	0.808411	0.191589	0.2936	0.7064
Pleurotus ostreatus	0.2535	0.2557	0.821865	0.178135	0.2635	0.7365
Pleurotus platypus	0.2588	0.2912	0.814683	0.185317	0.2679	0.7321
Schizophyllum commune	0.2453	/	0.838833	0.161167	0.2186	0.7814
Stropharia rugosoannulata	0.2894	0.3619	0.776359	0.223641	0.3105	0.6895
Tricholoma bakamatsutake	0.2531	0.2521	0.819671	0.180329	0.2231	0.7769
Tricholoma matsutake	0.2431	0.224	0.825364	0.174636	0.2068	0.7932
Volvariella volvacea	0.3159	0.3841	0.753285	0.246715	0.3846	0.6154

## Sheet: Sheet7
Table S7 Core PCGs and Un_ORFs detected in reverse strands of 34 Agaricales mitogenomes
Species	Class																						Number of Core PCGs	Number of Un_ORFs
Agaricus bisporus	Core PCGs	nad2	rps3	nad3																			3	7
	Un_ORFs	P3	orf347	dpo2	orf113	orf120	orf141	orf248
Amanita muscaria	Core PCGs	atp9	cox3																				2	3
	Un_ORFs	orf787	orf119	orf126
Amanita phalloides	Core PCGs	/																					0	3
	Un_ORFs	orf176	orf129	orf119
Amanita thiersii	Core PCGs	/																					0	3
	Un_ORFs	orf173	orf412	orf196
Armillaria sinapina	Core PCGs	nad6																					1	3
	Un_ORFs	dpo	dpo	orf202
Armillaria solidipes	Core PCGs	nad3	nad2																				2	5
	Un_ORFs	dpol	dpol	dpol	dpol	dpol
Asterophora parasitica	Core PCGs	nad4	atp9	cob																			3	2
	Un_ORFs	orf105	orf125
Clavaria fumosa	Core PCGs	atp8																					1	21
	Un_ORFs	orf175	orf114	orf103	orf708	orf338	orf108	orf321	orf265	orf175	orf527	orf109	orf393	orf111	orf218	orf753	orf103	orf302	orf220	orf240	orf415	orf260
Cyathus jiayuguanensis 765	Core PCGs	cob	rps3	nad3	cox3	atp8	nad4																6	5
	Un_ORFs	orf774	orf220	orf522	orf117	orf154
Cyathus striatus 87405	Core PCGs	/																					0	1
	Un_ORFs	orf125
Cyathus striatus AH440044	Core PCGs	/																					0	1
	Un_ORFs	orf125
Cyathus pallidus QL1	Core PCGs	/																					0	3
	Un_ORFs	orf164	orf115	orf145
Cyathus stercoreus NPCB004	Core PCGs	/																					0	3
	Un_ORFs	orf143	orf185	orf114
Flammulina velutipes	Core PCGs	/																					0	0
	Un_ORFs	/
Hygrophorus russula	Core PCGs	cox2	atp6	rps3																			3	1
	Un_ORFs	orf136
Laccaria amethystina	Core PCGs	nad6	atp6	nad4	atp8	nad1																	5	2
	Un_ORFs	orf224	orf339
Laccaria bicolor	Core PCGs	rps3	nad5	nad4L	cox2	cob	nad3	nad2	atp8														8	8
	Un_ORFs	orf816	orf281	orf109	orf236	orf238	orf171	orf280	orf249
Lepista sordida	Core PCGs	nad3	nad2	cob	nad1	nad5	nad4L	cox3	atp6	atp8	cox2												10	4
	Un_ORFs	orf439	orf111	orf481	orf316
Leucoagaricus naucinus	Core PCGs	cox2	nad3	nad2	atp8	atp9																	5	0
	Un_ORFs	/
Lyophyllum decastes	Core PCGs	atp9	rps3	cox2	cob	nad1																	5	1
	Un_ORFs	orf292
Lyophyllum shimeji	Core PCGs	cox2	atp8	nad3	nad2	nad5	nad4L	cox3	nad6	cob	nad1												10	5
	Un_ORFs	orf101	orf436	orf400	orf376	orf236
Macrolepiota fuliginosa	Core PCGs	nad3	nad2	cox2	cob																		4	1
	Un_ORFs	orf99
Marasmiellus scandens	Core PCGs	atp8																					1	3
	Un_ORFs	orf105	orf122	orf388
Marasmius tenuissimus	Core PCGs	atp8																					1	1
	Un_ORFs	orf190
Moniliophthora roreri	Core PCGs	atp8																					1	17
	Un_ORFs	orf121	orf81	orf139	orf108	orf343	orf157	orf115	orf304	orf344	orf122	orf253	orf248	orf302	orf79	orf378	orf176	orf99
Myochromella boudieri	Core PCGs	cob	nad1																				2	3
	Un_ORFs	D9L48_mgp04	D9L48_mgp03	D9L48_mgp02
Omphalotus japonicus	Core PCGs	nad4	cox3	atp9	nad3	nad2	atp8																6	18
	Un_ORFs	orf183	orf122	orf116	orf124	dpo	orf105	orf224	orf141	orf118	orf157	orf166	orf313	orf287	orf189	orf171	orf119	orf328	orf137
Pleurotus ostreatus	Core PCGs	/																					0	1
	Un_ORFs	orf343
Pleurotus platypus	Core PCGs	nad3	nad2																				2	1
	Un_ORFs	orf318
Schizophyllum commune	Core PCGs	cox1	atp8	atp9																			3	1
	Un_ORFs	orf212
Stropharia rugosoannulata	Core PCGs	atp9	atp6	rps3																			3	1
	Un_ORFs	orf254
Tricholoma bakamatsutake	Core PCGs	nad3	nad2	atp8	atp6																		4	0
	Un_ORFs	/
Tricholoma matsutake	Core PCGs	atp8	atp6																				2	2
	Un_ORFs	orf132A	orf109
Volvariella volvacea	Core PCGs	nad5	nad4L	cox3	atp8	atp6																	5	4
	Un_ORFs	orf139	orf201	orf118	orf109

## Sheet: Sheet8
Table S8 Repetitive sequence analysis of five Cyathus species.
Query/Subject ID	Identity(%)	Aligment length	Mismatches	Gap openings	Q.start	Q.end	S.start	S.end	e-value	Bit score
Cyathus striatus 87405	100	104	0	0	125348	125451	125296	125399	1.16e-48	193
Cyathus striatus 87405	100	104	0	0	125296	125399	125348	125451	1.16e-48	193
Cyathus striatus 87405	91.034	145	7	5	116366	116506	114313	114455	4.16e-48	191
Cyathus striatus 87405	91.034	145	7	5	114313	114455	116366	116506	4.16e-48	191
Cyathus striatus 87405	89.062	128	12	2	97310	97436	51483	51357	4.22e-38	158
Cyathus striatus 87405	85.915	142	14	5	126876	127014	126808	126946	9.13e-35	147
Cyathus striatus 87405	85.915	142	14	5	126808	126946	126876	127014	9.13e-35	147
Cyathus striatus 87405	98.684	76	1	0	28805	28880	28762	28837	1.98e-31	135
Cyathus striatus 87405	98.684	76	1	0	28762	28837	28805	28880	1.98e-31	135
Cyathus striatus 87405	94.444	72	3	1	93237	93308	38581	38651	1.2e-23	110
Cyathus striatus 87405	94.444	72	3	1	38581	38651	93237	93308	1.2e-23	110
Cyathus striatus 87405	80.537	149	18	8	126910	127055	126808	126948	5.57e-22	104
Cyathus striatus 87405	80.537	149	18	8	126808	126948	126910	127055	5.57e-22	104
Cyathus striatus 87405	98.276	58	1	0	100251	100308	100296	100353	2.01e-21	102
Cyathus striatus 87405	98.246	57	1	0	22903	22959	22837	22893	7.21e-21	100
Cyathus striatus 87405	98.246	57	1	0	22837	22893	22903	22959	7.21e-21	100
Cyathus striatus 87405	100	52	0	0	125400	125451	125296	125347	9.33e-20	97.1
Cyathus striatus 87405	100	52	0	0	125296	125347	125400	125451	9.33e-20	97.1
Cyathus striatus 87405	88	75	8	1	42077	42150	42042	42116	5.61e-17	87.9
Cyathus striatus 87405	88	75	8	1	42042	42116	42077	42150	5.61e-17	87.9
Cyathus striatus 87405	100	44	0	0	118170	118213	6247	6290	2.61e-15	82.4
Cyathus striatus 87405	81.081	111	14	6	113377	113482	113318	113426	2.61e-15	82.4
Cyathus striatus 87405	81.081	111	14	6	113318	113426	113377	113482	2.61e-15	82.4
Cyathus striatus 87405	100	44	0	0	6247	6290	118170	118213	2.61e-15	82.4
Cyathus striatus 87405	97.826	46	0	1	24857	24901	26578	26623	3.38e-14	78.7
Cyathus striatus 87405	94.118	51	3	0	125672	125722	125626	125676	3.38e-14	78.7
Cyathus striatus 87405	94.118	51	3	0	125626	125676	125672	125722	3.38e-14	78.7
Cyathus striatus 87405	100	39	0	0	123027	123065	122988	123026	1.57e-12	73.1
Cyathus striatus 87405	100	39	0	0	122988	123026	123027	123065	1.57e-12	73.1
Cyathus striatus 87405	89.474	57	5	1	97002	97058	97065	97120	5.65e-12	71.3
Cyathus striatus AH44044	91.034	145	7	5	109146	109286	107093	107235	3.7e-48	191
Cyathus striatus AH44044	91.034	145	7	5	107093	107235	109146	109286	3.7e-48	191
Cyathus striatus AH44044	88.158	152	14	4	94990	95139	94956	95105	2.88e-44	178
Cyathus striatus AH44044	88.158	152	14	4	94956	95105	94990	95139	2.88e-44	178
Cyathus striatus AH44044	87.387	111	5	4	107093	107194	66173	66283	1.77e-26	119
Cyathus striatus AH44044	87.387	111	5	4	66173	66283	107093	107194	1.77e-26	119
Cyathus striatus AH44044	97.826	46	0	1	21406	21450	23142	23187	3e-14	78.7
Cyathus striatus AH44044	97.727	44	1	0	110950	110993	3656	3699	1.08e-13	76.8
Cyathus striatus AH44044	85.333	75	10	1	36230	36303	36195	36269	1.08e-13	76.8
Cyathus striatus AH44044	85.333	75	10	1	36195	36269	36230	36303	1.08e-13	76.8
Cyathus striatus AH44044	97.727	44	1	0	3656	3699	110950	110993	1.08e-13	76.8
Cyathus striatus AH44044	97.436	39	1	0	115654	115692	115615	115653	6.5e-11	67.6
Cyathus striatus AH44044	97.436	39	1	0	115615	115653	115654	115692	6.5e-11	67.6
Cyathus jiayuguanensis 765	86.378	624	64	17	78840	79449	76371	76987	0	662
Cyathus jiayuguanensis 765	86.378	624	64	17	76371	76987	78840	79449	0	662
Cyathus jiayuguanensis 765	85.857	502	67	3	37322	37821	36822	37321	1.77e-150	531
Cyathus jiayuguanensis 765	85.857	502	67	3	36822	37321	37322	37821	1.77e-150	531
Cyathus jiayuguanensis 765	82.949	434	68	6	38367	38797	37823	38253	4.06e-107	387
Cyathus jiayuguanensis 765	82.949	434	68	6	37823	38253	38367	38797	4.06e-107	387
Cyathus jiayuguanensis 765	85.246	122	15	3	72565	72685	71875	71994	1.26e-27	122
Cyathus jiayuguanensis 765	85.246	122	15	3	71875	71994	72565	72685	1.26e-27	122
Cyathus jiayuguanensis 765	100	60	0	0	79687	79746	77208	77267	2.74e-24	111
Cyathus jiayuguanensis 765	100	60	0	0	77208	77267	79687	79746	2.74e-24	111
Cyathus jiayuguanensis 765	90.909	55	3	2	73135	73188	66682	66735	1.29e-12	73.1
Cyathus jiayuguanensis 765	90.909	55	3	2	66682	66735	73135	73188	1.29e-12	73.1
Cyathus pallidus QL1	97.826	92	1	1	109723	109813	61432	61523	3.36e-38	158
Cyathus pallidus QL1	97.826	92	1	1	61432	61523	109723	109813	3.36e-38	158
Cyathus pallidus QL1	98.765	81	1	0	100840	100920	47373	47453	2.62e-34	145
Cyathus pallidus QL1	98.765	81	1	0	47373	47453	100840	100920	2.62e-34	145
Cyathus pallidus QL1	100	74	0	0	111500	111573	11034	11107	4.38e-32	137
Cyathus pallidus QL1	100	74	0	0	11034	11107	111500	111573	4.38e-32	137
Cyathus pallidus QL1	89.32	103	11	0	83066	83168	83006	83108	7.33e-30	130
Cyathus pallidus QL1	89.32	103	11	0	83006	83108	83066	83168	7.33e-30	130
Cyathus pallidus QL1	97.143	70	1	1	86289	86357	61550	61619	5.71e-26	117
Cyathus pallidus QL1	97.143	70	1	1	61550	61619	86289	86357	5.71e-26	117
Cyathus pallidus QL1	91.935	62	1	3	55216	55276	48362	48420	5.79e-16	84.2
Cyathus pallidus QL1	95.918	49	1	1	103367	103414	84349	84397	2.69e-14	78.7
Cyathus stercoreus NPCB004	98.936	94	1	0	95311	95404	87774	87867	1.99e-41	169
Cyathus stercoreus NPCB004	98.936	94	1	0	87774	87867	95311	95404	1.99e-41	169
Cyathus stercoreus NPCB004	93.636	110	2	4	74799	74906	22305	22411	1.2e-38	159
Cyathus stercoreus NPCB004	93.636	110	2	4	22305	22411	74799	74906	1.2e-38	159
Cyathus stercoreus NPCB004	98.81	84	1	0	85439	85522	40769	40852	7.21e-36	150
Cyathus stercoreus NPCB004	98.81	84	1	0	40769	40852	85439	85522	7.21e-36	150
Cyathus stercoreus NPCB004	86.325	117	11	3	96324	96437	35454	35568	1.57e-27	122
Cyathus stercoreus NPCB004	86.325	117	11	3	35454	35568	96324	96437	1.57e-27	122
Cyathus stercoreus NPCB004	82.105	95	16	1	63386	63480	63271	63364	9.59e-15	80.5
Cyathus stercoreus NPCB004	90.741	54	1	1	85834	85883	85694	85747	2.08e-11	69.4
Cyathus stercoreus NPCB004	90.741	54	1	1	85694	85747	85834	85883	2.08e-11	69.4

## Sheet: Sheet9
Table S9 Tandem repeats detected in five Cyathus mitogenomes using the online program Tandem Repeats Finder
Cyathus striatus 87405
Indices	Period Size	Copy Number	Consensus Size	Percent Matches	Percent Indels	Score	A	C	G	T	Entropy (0-2)
8116--8150	12	2.9	12	86	0	52	68	8	2	20	1.29
20462--20514	22	2.4	22	100	0	106	64	22	0	13	1.28
20511--20635	58	2.1	61	86	4	175	63	12	7	16	1.5
20732--20792	11	5.9	10	77	19	63	70	26	0	3	1.02
20732--20776	16	2.9	16	90	6	67	71	26	0	2	0.98
20732--20786	27	2	27	86	6	76	70	25	0	3	1.03
20739--20812	12	5.9	12	73	14	60	74	22	0	2	0.95
21379--21449	18	3.9	18	79	0	79	52	12	5	29	1.62
21416--21467	18	2.9	18	85	5	61	53	9	1	34	1.45
21439--21478	18	2.2	18	90	0	62	50	15	0	35	1.44
23282--23317	19	1.9	19	88	5	56	58	25	2	13	1.49
24223--24292	26	2.7	26	95	4	124	51	4	8	35	1.52
24452--24505	18	2.9	19	77	5	65	38	14	1	44	1.56
26462--26509	20	2.4	20	82	0	69	50	20	4	25	1.66
27814--27925	18	5.9	18	76	12	80	40	0	21	37	1.6
27806--27913	42	2.6	41	86	1	144	38	0	20	39	1.59
28752--28880	23	5.9	23	77	10	153	39	25	3	31	1.71
28762--28880	43	2.8	43	98	0	229	39	24	2	33	1.69
39686--39815	12	10.8	12	85	3	120	59	3	15	21	1.52
39678--39823	24	6.1	23	76	9	98	58	3	16	21	1.52
39678--39823	36	4.1	36	75	10	138	58	3	16	21	1.52
40009--40046	18	2.1	18	90	0	58	63	0	2	34	1.09
40547--40603	25	2.3	25	90	0	87	59	0	7	33	1.24
40585--40623	15	2.6	15	91	0	60	64	0	12	23	1.28
41071--41164	30	3.2	30	72	4	84	59	22	0	18	1.37
41072--41158	15	5.9	15	71	12	63	60	20	0	18	1.36
41122--41179	15	3.9	15	82	13	66	56	24	0	18	1.41
41102--41181	15	5.7	15	69	19	64	57	25	0	17	1.4
41157--41231	15	5.1	15	76	7	57	66	20	1	12	1.3
41225--41273	13	3.7	13	97	2	89	71	8	6	14	1.29
41361--41410	20	2.5	19	87	3	64	68	8	4	20	1.32
41726--41777	25	2.1	25	82	10	63	44	40	7	7	1.62
42042--42146	34	3	35	87	4	133	44	20	18	16	1.86
42080--42150	34	2.1	34	100	0	142	49	16	16	16	1.8
42280--42361	24	3.4	24	96	0	146	57	19	0	23	1.41
43067--43104	12	3.2	12	96	0	67	42	21	0	36	1.53
43132--43204	30	2.4	29	84	8	85	56	19	2	21	1.55
43209--43314	36	3	36	90	5	162	50	22	5	20	1.69
43209--43325	35	3.3	35	89	1	162	49	22	5	22	1.71
43684--43728	14	3.4	13	82	14	56	33	4	0	62	1.15
43687--43731	22	2.1	22	88	8	67	37	4	0	57	1.19
43820--43860	12	3.5	12	86	6	57	68	17	0	14	1.22
43804--43857	23	2.4	23	82	11	67	68	16	1	12	1.29
47028--47064	18	2.1	18	94	0	65	21	0	2	75	0.92
47436--47479	21	2.1	21	82	0	52	29	2	11	56	1.46
48098--48155	30	1.9	30	86	6	82	32	15	8	43	1.77
48387--48423	15	2.5	15	95	0	65	29	8	13	48	1.71
48545--48608	21	3.2	20	76	13	69	0	3	23	73	0.97
48552--48608	23	2.4	23	80	13	55	0	3	22	73	0.98
48739--48787	12	4.1	12	83	0	62	6	14	30	48	1.67
48742--48787	18	2.6	18	85	0	56	6	15	28	50	1.69
49541--49570	12	2.6	12	94	5	53	76	6	0	16	0.99
49633--49660	12	2.3	12	100	0	56	53	25	10	10	1.67
49721--49794	28	2.6	28	86	0	112	44	1	9	44	1.44
51320--51353	12	2.8	12	95	0	59	20	8	0	70	1.13
51347--51409	12	5.3	12	100	0	126	9	15	15	58	1.62
51335--51409	36	2.1	36	92	0	123	12	14	13	60	1.6
51428--51482	24	2.3	24	87	0	74	18	9	7	65	1.44
51441--51495	24	2.3	24	83	0	74	20	10	3	65	1.39
52493--52555	25	2.6	24	84	2	72	47	20	1	30	1.6
52662--52725	30	2.1	31	91	2	103	25	10	18	45	1.82
52666--52734	31	2.3	30	85	7	86	26	13	17	43	1.85
53367--53414	24	2	25	95	4	89	75	6	4	14	1.16
53557--53605	18	2.7	18	100	0	98	22	16	16	44	1.86
54557--54624	35	1.9	35	87	0	100	64	13	5	16	1.46
54696--54764	25	3	23	79	10	68	44	23	0	31	1.53
54758--54811	24	2.2	25	83	3	74	53	9	0	37	1.33
58696--58720	12	2.1	12	100	0	50	76	0	0	24	0.8
59514--59641	14	9.2	14	77	10	93	60	14	0	24	1.34
59515--59628	35	3.3	35	82	1	158	59	14	0	25	1.36
59515--59641	35	3.7	35	81	1	157	60	14	0	24	1.34
59783--59819	18	2.1	18	89	0	56	51	13	8	27	1.69
60163--60188	12	2.2	12	100	0	52	34	23	0	42	1.54
63731--63758	13	2.2	13	100	0	56	28	64	0	7	1.2
64549--64620	18	4	18	79	0	72	52	15	8	23	1.69
64593--64633	18	2.3	18	91	0	64	39	19	4	36	1.73
65106--65206	27	3.7	27	97	0	184	61	2	2	32	1.26
65249--65330	29	2.8	29	88	0	119	59	9	1	29	1.37
65937--65970	18	1.9	18	88	5	52	82	5	0	11	0.83
66605--66636	14	2.3	14	100	0	64	62	12	0	25	1.3
66890--66985	26	3.7	26	79	6	97	31	10	12	45	1.76
66892--67007	52	2.2	52	80	8	130	31	10	10	48	1.71
66923--67007	26	3.3	26	85	3	109	30	10	7	51	1.63
66939--67032	26	3.6	27	82	5	95	31	10	4	53	1.55
66923--67032	52	2.1	52	81	3	123	31	10	5	51	1.59
67703--67781	17	4.6	17	90	0	113	54	17	6	21	1.65
68337--68364	12	2.3	12	100	0	56	57	10	7	25	1.58
73297--73434	12	11.5	12	81	0	132	27	9	1	61	1.35
73297--73410	18	6.3	18	76	0	102	27	8	1	62	1.35
73304--73438	36	3.8	36	80	0	153	28	8	1	61	1.35
73297--73438	24	5.9	24	79	0	149	28	9	1	61	1.35
76113--76151	17	2.1	18	86	13	53	82	2	5	10	0.93
76453--76501	17	2.8	18	87	6	73	61	12	4	22	1.48
76548--76630	35	2.4	35	85	0	121	60	2	4	32	1.31
78547--78623	34	2.3	34	100	0	154	49	24	7	18	1.74
78677--78723	24	1.9	24	82	4	58	68	8	0	23	1.17
79062--79091	11	2.7	11	94	0	51	43	30	0	26	1.55
79094--79146	21	2.5	21	90	0	79	75	0	3	20	0.96
79103--79156	18	2.9	18	86	2	72	77	0	1	20	0.86
79446--79523	27	2.9	27	92	3	113	28	15	5	51	1.64
79452--79538	27	3.2	27	88	6	97	27	14	5	51	1.65
79648--79689	18	2.3	18	83	0	57	57	21	2	19	1.52
79974--80036	32	2	32	96	0	117	53	20	9	15	1.69
80552--80584	12	2.8	12	90	0	57	75	12	3	9	1.14
82959--82997	18	2.2	18	85	0	51	43	7	17	30	1.77
83395--83508	24	4.8	24	80	3	122	35	21	7	36	1.8
83395--83508	48	2.4	48	87	0	165	35	21	7	36	1.8
83510--83552	18	2.4	18	96	0	77	18	9	20	51	1.74
83704--83749	24	1.9	24	82	8	58	45	0	6	47	1.28
83764--83798	12	2.9	12	95	0	61	34	14	14	37	1.86
83786--83834	24	2	24	88	7	73	34	10	12	42	1.76
83789--83841	24	2.2	24	83	6	63	39	11	11	37	1.77
83826--83869	12	3.7	12	93	0	70	56	4	11	27	1.53
84265--84296	16	2	16	93	0	55	43	34	6	15	1.72
85434--85507	14	5.4	14	77	6	80	37	17	6	37	1.76
85434--85507	27	2.7	27	93	0	130	37	17	6	37	1.76
87111--87186	33	2.3	33	93	0	125	51	17	3	27	1.63
87640--87704	16	4.1	16	94	4	87	63	18	1	16	1.4
87636--87704	32	2.1	33	86	10	106	62	17	1	18	1.41
87830--87862	16	2.1	16	100	0	66	51	6	0	42	1.26
88016--88047	15	2.1	16	88	11	50	59	31	0	9	1.29
88772--88828	18	3.2	18	79	0	78	42	7	3	47	1.47
88772--88849	36	2.2	36	86	9	106	39	8	3	47	1.53
90092--90120	13	2.2	13	100	0	58	51	17	0	31	1.45
90711--90766	17	3.2	17	89	2	76	58	17	5	17	1.56
92687--92743	24	2.4	24	90	0	87	40	0	26	33	1.56
92873--92924	19	2.7	19	87	0	68	40	30	7	21	1.81
94142--94180	20	1.9	20	84	5	51	20	23	2	53	1.57
94737--94870	49	2.7	48	78	4	135	53	19	4	22	1.62
95329--95365	14	2.6	14	100	0	74	24	5	13	56	1.58
96392--96502	25	4.2	25	74	15	89	41	38	0	19	1.52
96392--96500	40	2.7	40	98	0	209	41	39	0	19	1.51
96897--96967	20	3.5	20	92	0	106	36	7	4	52	1.48
96933--96983	20	2.5	20	87	0	66	45	11	3	39	1.59
96895--96980	40	2.2	40	86	0	118	40	9	4	45	1.57
97002--97120	63	1.9	62	89	5	186	42	12	18	26	1.86
97037--97143	50	2.1	53	87	5	157	44	12	17	25	1.83
97330--97380	24	2.1	25	85	3	68	50	25	13	9	1.72
97384--97420	12	3.1	12	100	0	74	59	16	16	8	1.59
97406--97440	18	1.9	18	94	0	61	71	8	11	8	1.31
97384--97432	24	2	24	84	0	62	63	12	14	10	1.53
97820--97915	44	2.2	44	100	0	192	55	16	13	14	1.7
99161--99189	14	2	15	93	6	51	51	27	0	20	1.47
99622--99697	15	5.1	15	95	1	127	47	30	6	15	1.71
99736--99787	18	2.8	18	88	2	77	50	17	9	23	1.75
99929--100013	34	2.5	34	98	0	161	49	18	9	22	1.76
100251--100353	45	2.3	45	98	0	197	50	15	5	28	1.67
100251--100359	15	7.3	15	71	4	85	50	15	5	28	1.66
100584--100638	12	4.6	12	80	8	67	43	5	14	36	1.69
100609--100712	36	2.9	36	85	0	136	37	13	16	32	1.87
100968--101034	14	4.9	14	74	17	59	47	22	2	26	1.65
100947--101045	41	2.6	37	79	14	119	46	18	5	30	1.7
102074--102134	13	4.7	13	85	0	77	60	13	4	21	1.51
102067--102129	26	2.4	26	89	0	90	60	14	4	20	1.52
102087--102138	20	2.6	21	79	11	65	59	13	1	25	1.44
102389--102434	20	2.2	21	84	3	58	43	6	0	50	1.28
102680--102706	12	2.3	12	100	0	54	59	11	7	22	1.56
104883--104917	15	2.3	15	90	0	52	60	8	0	31	1.27
106666--106717	27	1.9	27	88	0	77	38	11	9	40	1.74
106780--106831	27	1.9	27	84	0	68	51	11	13	23	1.73
106960--107018	18	3.5	16	90	6	66	69	3	1	25	1.13
106973--107018	18	2.6	18	100	0	92	69	4	0	26	1.07
107078--107114	15	2.5	15	100	0	74	54	16	8	21	1.68
108219--108284	18	3.7	18	95	0	114	24	9	13	53	1.69
108301--108370	23	3.2	23	68	20	60	58	14	8	18	1.61
108616--108691	23	3.3	23	83	7	109	25	13	13	48	1.78
108678--108743	17	3.9	17	93	0	105	25	9	24	40	1.84
109685--109726	18	2.3	18	95	0	75	16	7	9	66	1.42
109990--110091	40	2.5	40	82	3	107	26	12	7	52	1.66
110020--110130	40	2.8	37	78	10	105	27	13	5	53	1.62
110153--110260	42	2.6	41	82	5	119	28	16	8	46	1.76
110189--110272	41	2	41	90	4	134	28	15	7	48	1.71
110804--110838	12	2.8	12	95	4	61	74	0	0	25	0.82
110863--110894	16	2	16	100	0	64	43	25	12	18	1.85
111063--111094	16	2	16	93	0	55	40	43	6	9	1.62
112510--112590	21	3.9	21	98	0	153	50	27	12	9	1.71
112587--112643	14	4.2	14	76	10	57	63	8	14	14	1.52
112691--112769	26	2.6	32	71	24	98	49	17	7	25	1.73
112709--112767	26	2.3	26	96	0	109	50	15	10	23	1.74
113028--113058	11	2.8	11	100	0	62	25	19	9	45	1.81
113125--113167	13	3.2	13	93	3	68	16	6	0	76	0.99
113250--113332	31	2.7	31	86	0	112	43	4	7	44	1.53
113279--113332	18	3.3	17	70	24	53	46	3	7	42	1.49
113344--113433	13	6.4	13	76	16	90	22	15	12	50	1.77
121100--121161	30	2.1	30	84	6	81	67	6	6	19	1.35
121679--121714	17	2.1	18	90	10	58	47	22	5	25	1.73
121922--121960	18	2.2	18	100	0	78	66	17	0	15	1.25
121922--121960	12	3.3	12	100	0	78	66	17	0	15	1.25
122560--122588	13	2.2	13	100	0	58	34	34	6	24	1.82
122796--122885	27	3.3	27	90	0	135	24	10	13	52	1.71
122988--123065	39	2	39	100	0	156	38	20	12	28	1.89
123092--123181	15	6	15	86	0	126	21	18	7	52	1.7
123092--123185	20	4.7	20	89	0	134	21	18	8	52	1.71
123567--123612	22	2.1	22	87	0	65	56	19	6	17	1.62
123592--123692	42	2.4	42	83	8	123	52	23	5	17	1.67
124276--124336	12	5.1	12	97	0	113	57	16	0	26	1.39
124753--124800	25	1.9	25	100	0	96	33	8	8	50	1.63
124914--124966	17	3.1	17	91	0	79	49	22	13	15	1.79
125327--125416	30	3.3	30	64	23	88	14	26	6	52	1.66
125296--125451	52	3	52	100	0	312	13	26	7	51	1.67
125409--125456	22	2.2	22	84	0	60	12	20	6	60	1.54
125484--125546	28	2.3	28	100	0	126	12	19	19	49	1.79
125611--125641	16	1.9	16	100	0	62	54	0	6	38	1.26
125635--125723	23	3.9	23	95	0	160	33	15	4	46	1.66
125889--125947	24	2.5	24	91	2	93	30	33	1	33	1.68
125894--125936	16	2.7	16	92	0	68	32	34	0	32	1.58
125898--125944	16	2.9	16	81	6	51	31	34	2	31	1.7
126808--126948	34	4.1	34	96	0	264	36	21	7	33	1.83
126924--127014	34	2.7	34	92	0	155	41	9	14	34	1.79
126821--126982	68	2.4	67	87	4	218	38	18	9	33	1.84
126808--127014	102	2	100	83	7	256	38	17	10	33	1.84
127082--127132	21	2.4	22	84	15	72	29	11	0	58	1.33
127080--127157	14	5.6	14	75	0	66	34	11	0	53	1.37
127692--127788	14	6.9	14	82	2	122	64	21	6	7	1.4
Cyathus striatus AH44044
Indices	Period Size	Copy Number	Consensus Size	Percent Matches	Percent Indels	Score	A	C	G	T	Entropy (0-2)
2376--2412	18	2.1	18	94	0	65	67	0	2	29	1.04
17128--17180	22	2.4	22	100	0	106	64	22	0	13	1.28
17399--17456	16	3.7	15	84	13	73	68	27	0	3	1.05
17402--17474	11	6.6	11	75	13	53	71	26	0	2	1
17415--17476	24	2.5	24	78	19	74	74	20	0	4	1
18041--18091	18	2.8	18	75	0	57	49	15	7	27	1.72
18078--18129	18	2.9	18	85	5	61	53	9	1	34	1.45
18101--18140	18	2.2	18	90	0	62	50	15	0	35	1.44
19825--19860	19	1.9	19	88	5	56	58	25	2	13	1.49
20759--20828	26	2.7	26	93	4	115	50	4	8	37	1.53
20997--21036	18	2.2	19	86	4	55	42	15	0	42	1.46
23010--23050	20	2	20	90	0	64	46	19	4	29	1.71
33808--33934	12	10.6	12	83	3	132	60	3	11	24	1.47
33799--33952	48	3.2	48	75	9	154	61	3	11	23	1.45
34025--34076	18	2.9	18	94	0	95	38	34	0	26	1.57
34102--34141	18	2.2	18	100	0	80	62	0	0	37	0.95
34109--34149	18	2.3	18	91	0	64	63	0	2	34	1.08
34650--34706	25	2.3	25	90	0	87	59	0	7	33	1.24
35183--35323	25	5.2	25	72	21	124	63	18	0	18	1.32
35197--35331	15	9.7	15	66	20	87	61	20	0	17	1.35
35177--35331	55	2.8	55	99	0	301	63	18	0	18	1.32
35375--35436	13	4.7	13	97	2	115	70	8	6	14	1.3
35523--35573	20	2.6	19	81	3	57	70	5	3	19	1.24
35879--35930	25	2.1	25	82	10	63	44	40	7	7	1.62
36233--36303	34	2.1	34	100	0	142	49	16	16	16	1.8
36436--36533	18	5.5	18	87	1	126	56	20	1	22	1.49
37200--37247	12	4	12	88	0	69	43	25	0	31	1.55
37200--37255	18	3.1	18	84	5	78	42	25	0	32	1.55
37283--37408	30	4.4	30	75	17	108	52	19	3	23	1.63
37308--37354	23	2	23	87	0	67	48	23	0	27	1.51
37413--37517	36	3	35	91	4	158	50	22	5	20	1.69
37413--37529	35	3.3	35	87	1	153	48	23	5	22	1.72
37887--37931	14	3.4	13	82	14	56	33	4	0	62	1.15
37890--37934	22	2.1	22	88	8	67	37	4	0	57	1.19
38023--38063	12	3.5	12	86	6	57	68	17	0	14	1.22
38014--38063	23	2.1	24	85	3	66	68	14	2	16	1.31
41225--41259	18	1.9	18	94	0	61	22	0	2	74	0.95
41660--41735	30	2.5	30	82	0	98	28	11	11	47	1.76
41955--41991	15	2.5	15	95	0	65	29	8	13	48	1.71
42113--42176	21	3.2	20	76	13	69	0	3	23	73	0.97
42120--42176	23	2.4	23	80	13	55	0	3	22	73	0.98
42307--42355	12	4.1	12	83	0	62	6	14	30	48	1.67
42310--42355	18	2.6	18	85	0	56	6	15	28	50	1.69
43103--43133	12	2.7	12	95	5	55	77	6	0	16	0.97
43195--43222	12	2.3	12	100	0	56	53	25	10	10	1.67
44809--44860	12	4.5	11	76	11	50	73	7	1	17	1.16
45920--46008	35	2.5	35	83	3	108	64	12	5	17	1.46
46166--46219	24	2.2	25	83	3	74	53	9	0	37	1.33
48399--48441	18	2.4	18	76	0	50	53	16	4	25	1.62
50092--50116	12	2.1	12	100	0	50	76	0	0	24	0.8
50919--51025	28	3.6	28	77	16	124	59	14	0	26	1.35
51043--51088	14	3.2	14	81	3	56	56	21	2	19	1.52
51805--51830	12	2.2	12	100	0	52	34	23	0	42	1.54
55355--55382	13	2.2	13	100	0	56	28	64	0	7	1.2
56176--56210	12	2.9	12	86	0	52	45	17	11	25	1.81
57186--57218	17	1.9	17	88	11	50	81	6	0	12	0.85
57854--57885	14	2.3	14	100	0	64	62	12	0	25	1.3
58119--58164	20	2.2	21	80	7	58	36	8	13	41	1.75
58129--58178	20	2.4	21	93	3	84	24	10	16	50	1.75
58168--58249	26	3.1	27	84	6	89	32	10	3	52	1.54
58497--58575	25	3.2	25	94	1	124	43	12	6	37	1.68
58497--58667	50	3.6	49	71	17	144	39	12	6	40	1.69
58535--58621	25	3.5	25	86	9	108	37	12	4	44	1.63
59017--59092	17	4.5	17	88	0	107	53	17	6	22	1.66
59035--59095	17	3.6	17	95	0	113	49	18	6	26	1.71
59017--59092	34	2.2	34	92	0	125	53	17	6	22	1.66
59648--59675	12	2.3	12	100	0	56	57	10	7	25	1.58
62800--62857	27	2.1	27	83	0	71	32	8	17	41	1.8
64610--64747	12	11.5	12	84	0	150	28	8	0	61	1.31
64603--64750	36	4.1	36	84	1	170	27	8	0	62	1.29
64659--64722	18	3.6	18	78	0	74	28	9	0	62	1.26
70178--70227	17	2.8	18	87	6	75	60	12	4	24	1.49
70266--70338	13	5.7	13	73	20	73	60	1	1	36	1.14
70273--70390	35	3.4	35	89	0	182	59	2	4	33	1.3
71340--71386	20	2.4	19	82	10	58	44	17	0	38	1.48
71537--71625	43	2.1	43	87	8	128	47	29	4	19	1.69
74452--74484	12	2.8	12	90	0	57	75	12	3	9	1.14
74556--74605	25	2	25	100	0	100	48	12	4	36	1.59
76962--77014	24	2.2	24	83	6	63	43	0	11	45	1.4
77022--77056	12	2.9	12	91	0	61	34	20	11	34	1.88
77032--77111	30	2.7	30	82	3	90	38	11	12	37	1.79
77388--77462	14	5.4	14	84	6	89	49	13	14	22	1.78
77388--77462	28	2.7	28	83	8	98	49	13	14	22	1.78
77537--77568	16	2	16	93	0	55	43	34	6	15	1.72
78724--78799	14	5.6	14	79	6	84	40	17	6	35	1.75
78724--78799	27	2.8	27	91	0	125	40	17	6	35	1.75
79431--79469	18	2.2	18	95	0	69	17	0	12	69	1.19
79884--79959	33	2.3	33	88	0	116	50	17	5	27	1.67
80409--80495	33	2.7	33	94	1	149	59	17	0	22	1.37
80411--80495	16	5.2	16	94	4	134	60	17	0	22	1.37
81580--81636	18	3.2	18	89	0	96	36	10	3	49	1.55
81580--81655	36	2.1	36	87	4	109	34	11	3	50	1.58
81879--81917	12	3.3	12	88	0	60	74	12	0	12	1.08
81879--81918	18	2.2	19	90	4	64	75	12	0	12	1.06
81961--82063	51	2	51	100	0	206	63	21	1	13	1.4
82493--82615	46	2.6	47	84	6	178	24	14	10	50	1.74
82493--82615	47	2.6	48	85	5	180	24	14	10	50	1.74
82990--83018	13	2.2	13	100	0	58	51	17	0	31	1.45
83645--83691	18	2.6	19	93	6	73	59	19	0	21	1.38
83710--83763	27	2	27	96	0	99	53	18	3	24	1.6
85522--85570	24	2	24	88	0	71	42	0	16	40	1.48
88248--88286	20	1.9	20	84	5	51	20	23	2	53	1.57
89376--89412	14	2.6	14	100	0	74	24	5	13	56	1.58
90396--90464	15	4.9	15	79	16	94	52	27	0	20	1.47
90381--90449	25	2.8	25	91	4	113	53	26	0	20	1.45
90396--90474	40	2	40	97	0	149	50	29	0	20	1.48
90862--90932	20	3.5	20	88	0	97	35	7	4	53	1.48
90898--90948	20	2.5	20	87	0	66	45	11	3	39	1.59
90860--90945	40	2.2	40	84	0	109	39	9	4	46	1.57
91280--91320	12	3.4	12	93	0	64	63	9	14	12	1.52
91280--91328	24	2	24	84	7	64	65	10	14	10	1.47
92460--92497	16	2.5	15	91	8	60	57	21	13	7	1.6
92467--92500	16	2.1	16	100	0	68	58	17	11	11	1.62
92720--92793	14	5.3	14	81	0	76	32	9	27	31	1.88
92719--92793	21	3.6	21	73	7	71	33	9	26	30	1.88
93148--93228	30	2.7	30	82	3	92	59	16	12	12	1.62
93140--93238	42	2.4	42	75	3	110	56	19	10	14	1.66
94674--94719	15	3.1	15	90	3	76	47	30	6	15	1.7
94758--94809	18	2.8	18	97	2	95	50	17	9	23	1.75
94956--95048	34	2.7	34	93	1	150	50	22	7	19	1.72
95036--95124	34	2.6	34	98	0	169	39	23	6	30	1.81
95304--95412	45	2.4	45	95	0	200	49	14	4	31	1.64
95304--95412	15	7.3	15	67	15	73	49	14	4	31	1.64
95631--95685	12	4.6	12	80	8	67	41	5	14	38	1.69
95631--95759	36	3.6	36	80	2	125	37	12	15	34	1.85
95830--95875	15	3.1	14	84	3	56	32	8	2	56	1.42
96020--96086	14	4.9	14	72	20	52	46	22	4	26	1.71
95999--96097	41	2.6	37	80	14	128	45	18	6	30	1.73
97119--97183	26	2.5	26	92	0	112	60	13	0	26	1.34
97119--97174	13	4.3	13	97	0	103	62	14	0	23	1.31
97445--97490	20	2.2	21	84	3	58	43	6	0	50	1.28
100433--100489	27	2.1	27	93	6	98	36	22	0	40	1.55
100433--100489	13	4.2	14	97	2	100	36	22	0	40	1.55
100614--100649	18	2	18	88	0	54	44	13	19	22	1.86
100594--100646	27	2	27	84	0	70	50	13	13	22	1.75
100789--100838	18	2.8	18	96	3	93	72	4	0	24	1.02
100889--100925	15	2.5	15	100	0	74	54	16	8	21	1.68
101739--101771	13	2.4	14	90	10	50	78	0	6	15	0.93
102030--102077	18	2.7	18	100	0	96	22	10	14	52	1.72
102094--102160	23	3.1	22	69	23	61	56	16	8	17	1.65
102409--102484	23	3.3	23	80	7	100	23	13	14	48	1.79
102471--102536	17	3.9	17	87	0	96	27	7	22	42	1.8
102715--102748	15	2.3	15	100	0	68	14	55	11	17	1.68
103106--103172	12	5.6	12	72	13	66	62	11	8	16	1.53
103097--103167	24	3	24	97	0	133	63	12	8	15	1.51
103664--103749	12	6.9	12	79	7	100	70	2	1	25	1.06
103664--103749	18	4.6	18	75	13	93	70	2	1	25	1.06
103745--103776	16	2	16	100	0	64	43	25	12	18	1.85
103945--103976	16	2	16	93	0	55	40	43	6	9	1.62
105347--105423	14	5.5	14	76	14	61	49	25	14	10	1.75
105347--105416	21	3.3	21	97	0	131	50	25	14	10	1.74
105472--105575	33	3.2	33	79	8	115	48	20	4	26	1.69
105808--105838	11	2.8	11	100	0	62	25	19	9	45	1.81
105905--105950	13	3.5	13	90	0	74	15	8	0	76	1.02
106030--106112	31	2.7	31	86	0	112	43	4	7	44	1.53
106059--106112	18	3.3	17	70	24	53	46	3	7	42	1.49
106124--106165	13	3.2	13	93	0	75	23	14	14	47	1.8
113825--113886	30	2.1	30	84	6	81	67	6	6	19	1.35
114344--114379	17	2.1	18	90	10	58	47	22	5	25	1.73
114583--114617	12	2.9	12	100	0	70	65	17	0	17	1.27
114583--114617	18	1.9	18	100	0	70	65	17	0	17	1.27
115210--115238	13	2.2	13	100	0	58	34	34	6	24	1.82
115440--115507	27	2.6	26	83	2	91	25	10	16	48	1.77
115615--115692	39	2	39	97	0	147	42	17	11	28	1.84
116178--116223	22	2.1	22	87	0	65	54	19	8	17	1.68
116203--116303	42	2.4	42	83	8	123	52	23	5	17	1.67
116891--116951	12	5.1	12	97	0	113	57	16	0	26	1.39
117367--117417	25	2	26	92	3	86	29	7	11	50	1.67
117615--117675	28	2.2	28	93	0	104	47	16	14	21	1.82
117531--117696	17	10.1	17	81	7	182	48	17	15	18	1.81
118037--118135	52	1.9	52	97	0	189	16	23	10	50	1.75
118168--118262	28	3.4	28	83	2	111	15	16	17	49	1.8
118313--118406	23	4.1	23	95	0	161	34	12	8	44	1.73
119494--119695	34	5.9	34	91	2	250	37	18	9	34	1.84
119760--119810	21	2.4	22	84	15	72	29	11	0	58	1.33
119758--119835	14	5.6	14	75	0	66	34	11	0	53	1.37
120361--120457	14	6.9	14	82	2	122	64	21	6	7	1.4
Cyathus jiayuguanensis 765
Indices	Period Size	Copy Number	Consensus Size	Percent Matches	Percent Indels	Score	A	C	G	T	Entropy (0-2)
7671--7733	24	2.6	24	100	0	126	55	28	0	15	1.41
12638--12731	12	7.1	13	78	13	79	29	2	2	65	1.15
12630--12659	11	2.6	11	94	5	51	26	3	0	70	1.03
13108--13182	37	2.1	36	94	2	132	36	17	20	26	1.94
13669--13713	21	2.1	21	91	0	72	15	4	8	71	1.28
13736--13766	11	2.7	12	95	5	55	22	6	0	70	1.09
13793--13881	17	5.4	17	70	24	57	41	31	1	25	1.63
13932--13962	11	2.7	11	95	5	53	3	70	0	25	1.02
13979--14003	13	1.9	13	100	0	50	32	0	60	8	1.26
13999--14041	11	3.9	11	87	0	59	53	6	18	20	1.67
14138--14203	11	6.1	11	75	19	59	69	4	1	24	1.15
14130--14175	14	3.4	14	77	19	53	69	6	0	23	1.11
14523--14563	18	2.3	18	95	0	73	39	12	7	41	1.7
14591--14636	21	2.1	22	88	4	67	34	17	4	43	1.69
14601--14644	21	2.1	21	83	8	54	31	18	4	45	1.69
14754--14804	21	2.4	21	87	12	70	47	19	1	31	1.61
14765--14804	14	2.8	14	84	3	53	47	20	0	32	1.5
14964--15001	14	2.7	14	91	0	58	50	2	15	31	1.58
15128--15180	14	3.8	14	82	9	63	35	7	16	39	1.78
15484--15519	11	3.2	11	92	4	54	25	2	69	2	1.15
16565--16614	13	3.9	13	86	2	57	62	2	14	22	1.42
16533--16635	44	2.3	45	83	8	131	55	6	15	22	1.64
16562--16634	31	2.3	32	88	4	105	56	5	15	23	1.6
17363--17397	12	2.9	12	86	0	52	34	28	5	31	1.81
17570--17636	35	1.9	35	87	6	100	40	22	11	25	1.88
17575--17642	17	3.9	17	76	3	64	38	27	11	22	1.89
17914--17987	14	5.3	14	93	0	76	43	13	0	43	1.44
17914--17980	21	3.2	21	86	0	80	44	13	0	41	1.43
25443--25540	12	7.9	12	92	6	128	84	11	0	4	0.75
25450--25535	45	1.9	45	88	9	131	84	10	0	4	0.75
25444--25540	50	2	49	82	10	108	84	11	0	4	0.75
27098--27133	18	2	18	94	0	63	63	0	0	36	0.94
27378--27414	18	2.1	18	89	0	56	51	0	10	37	1.37
28979--29029	18	2.8	18	84	0	75	39	3	9	47	1.55
29315--29344	15	2	15	93	0	51	40	16	6	36	1.75
29471--29522	23	2.2	24	80	13	63	5	7	17	69	1.33
29923--29964	17	2.5	17	88	7	59	66	0	0	33	0.92
29923--29964	20	2.1	20	95	0	75	66	0	0	33	0.92
29996--30053	19	2.6	24	69	25	63	50	15	8	25	1.73
30003--30044	19	2.2	19	91	0	66	50	19	4	26	1.67
30751--30799	20	2.5	20	86	0	71	59	2	2	36	1.21
30840--30891	14	3.7	14	100	0	104	28	28	5	36	1.8
30925--30981	14	4.3	14	80	13	66	57	7	7	28	1.51
30937--30974	18	2.1	18	90	0	58	60	5	5	28	1.4
30932--30981	25	2	25	92	0	82	60	4	8	28	1.43
31314--31372	14	4.3	14	87	6	77	25	15	0	59	1.36
31307--31374	21	3.3	20	85	6	91	23	16	0	60	1.36
31321--31381	27	2.3	28	91	5	99	27	11	0	60	1.31
31769--31837	26	2.5	28	86	6	97	59	5	11	23	1.53
31800--31866	33	2	35	85	5	93	56	5	11	25	1.57
33917--33977	26	2.4	26	89	5	90	29	0	4	65	1.13
36822--37773	500	1.9	500	87	3	1387	28	13	15	41	1.85
38917--38959	15	2.9	15	93	3	70	65	0	0	34	0.93
39422--39467	12	3.8	12	85	0	56	36	10	30	21	1.88
39422--39467	24	1.9	24	86	0	65	36	10	30	21	1.88
39490--39546	14	4.1	14	75	4	53	63	1	17	17	1.4
39616--39721	44	2.4	44	87	3	142	40	0	21	36	1.6
39657--39723	12	5.9	12	77	13	70	38	0	22	38	1.54
39655--39726	32	2.3	32	80	4	92	38	0	20	40	1.53
39655--39726	20	3.4	20	83	12	74	38	0	20	40	1.53
39915--39953	18	2.2	17	95	4	69	69	0	2	28	1.02
39919--39980	21	3.1	20	84	6	65	66	3	6	24	1.3
40026--40059	11	3	11	91	4	50	29	0	61	8	1.26
40816--40859	15	2.9	15	100	0	88	27	6	13	52	1.66
41192--41256	24	2.7	24	85	2	85	32	23	0	44	1.53
41414--41471	21	2.8	21	89	0	98	22	24	13	39	1.9
46174--46271	27	3.6	28	83	5	110	22	16	14	46	1.82
46174--46288	27	4.1	27	80	7	106	22	13	15	47	1.81
46293--46321	13	2.1	14	93	6	51	37	0	13	48	1.43
47697--47771	18	4.2	18	93	5	125	48	0	16	36	1.46
47803--47851	25	2	26	88	8	75	61	0	16	22	1.34
48008--48058	17	3.3	16	81	13	70	66	0	0	33	0.92
48004--48059	24	2.3	24	87	0	76	64	0	0	35	0.94
49178--49214	13	2.8	13	95	0	65	37	27	8	27	1.84
49687--49723	16	2.3	16	95	0	65	54	5	5	35	1.47
49887--49941	15	3.7	15	95	0	101	63	0	1	34	1.05
49886--49936	22	2.4	22	80	9	61	66	0	1	31	1.03
50638--50676	19	2.1	19	85	0	51	15	10	7	66	1.43
51588--51887	39	7.3	39	78	10	276	32	11	10	46	1.73
51598--51887	84	3.5	85	83	5	364	31	11	10	46	1.73
51711--51768	18	2.9	21	75	15	59	32	12	6	48	1.67
51824--51887	19	3.3	19	72	12	67	29	9	7	53	1.61
53031--53157	45	2.8	45	82	1	164	30	15	10	43	1.8
53909--53979	25	2.9	25	80	15	78	19	0	4	76	0.96
54337--54402	11	6	11	100	0	132	18	0	18	63	1.31
54610--54691	15	5.5	15	91	4	130	56	6	18	19	1.62
54690--54743	26	2.1	26	85	0	72	51	0	18	29	1.46
54904--54946	21	2	21	86	4	59	46	25	0	27	1.53
54908--54946	11	3.6	11	89	6	62	43	25	0	30	1.55
54902--54949	11	4.6	10	89	5	60	47	22	0	29	1.51
55027--55116	24	3.8	24	73	2	74	35	18	7	37	1.8
55108--55162	18	3.1	18	89	0	92	38	18	5	38	1.74
55100--55162	12	5.3	12	75	7	56	39	17	6	36	1.75
55049--55127	24	3.3	24	70	0	77	37	18	7	35	1.8
55034--55141	48	2.2	47	79	6	117	35	19	8	37	1.82
55197--55251	18	3.1	18	81	0	74	29	21	9	40	1.84
55180--55257	12	6.5	12	83	0	93	30	23	7	38	1.83
55272--55316	21	2.1	21	87	0	63	40	6	17	35	1.76
55280--55331	21	2.5	21	93	0	86	32	13	19	34	1.9
55485--55534	26	1.9	26	100	0	100	32	18	24	26	1.97
55689--55752	29	2.2	29	91	2	85	53	0	17	29	1.44
55767--55852	13	6.6	13	77	5	57	38	2	23	36	1.68
55767--55852	26	3.3	26	69	6	75	38	2	23	36	1.68
55912--55972	14	4.4	14	97	0	113	54	0	16	29	1.43
56060--56113	24	2.3	24	96	0	99	44	0	20	35	1.52
56255--56294	21	2	20	90	5	62	37	0	57	5	1.21
56371--56400	13	2.3	13	94	0	51	30	10	16	43	1.81
56405--56464	20	3.1	19	83	7	66	26	0	15	58	1.37
56404--56478	26	3	26	94	3	127	26	0	14	58	1.37
56531--56593	14	4.6	14	77	13	60	26	0	15	57	1.39
56528--56593	21	3.2	20	82	8	78	27	0	15	57	1.38
56575--56603	14	2.1	14	100	0	58	20	0	27	51	1.47
56517--56599	21	4.1	20	76	15	73	26	0	16	56	1.41
56987--57062	12	6.7	12	82	5	52	28	3	18	48	1.66
57142--57181	21	2	20	90	5	62	37	0	57	5	1.21
58796--58841	24	2	23	95	4	83	21	4	8	65	1.38
59793--59868	18	4.2	18	83	8	93	31	5	6	56	1.47
59812--59868	12	4.8	12	84	0	69	33	3	7	56	1.43
61869--61904	18	2	18	88	0	54	33	0	16	50	1.46
61887--61920	12	2.8	12	90	0	50	32	0	17	50	1.47
61949--61983	18	1.9	18	88	0	52	62	2	5	28	1.32
62349--62401	27	2	27	88	7	81	7	5	16	69	1.31
62882--62924	13	3.3	13	93	0	68	41	6	6	44	1.58
62984--63060	13	5.9	13	96	0	145	59	7	7	24	1.52
63085--63131	15	3.1	15	70	11	51	27	4	4	63	1.31
63626--63668	12	3.8	12	81	12	63	20	0	23	55	1.43
63619--63670	22	2.4	22	100	0	104	25	0	21	53	1.45
63891--63944	12	4.5	12	90	0	72	25	5	24	44	1.75
63990--64042	23	2.3	23	81	9	72	33	5	11	49	1.62
64574--64683	11	9.9	11	95	3	177	18	0	7	74	1.04
64894--64986	11	8.5	11	100	0	186	17	0	26	55	1.42
65178--65228	21	2.4	21	80	6	59	31	21	9	37	1.86
65736--65784	25	2	25	91	0	80	63	4	12	20	1.45
65771--65824	15	3.5	15	79	2	63	55	3	9	31	1.49
65816--65872	20	2.9	19	84	2	69	54	12	12	21	1.69
65816--65879	20	3	20	75	9	56	53	15	10	20	1.72
66818--66908	22	3.8	24	80	11	114	35	10	0	53	1.36
66818--66910	48	2	46	91	4	150	36	10	0	52	1.36
68047--68089	21	2	21	90	0	68	37	0	41	20	1.53
68594--68627	12	2.8	12	100	0	68	8	32	35	23	1.86
69071--69137	28	2.3	27	87	12	98	20	1	4	73	1.09
69336--69411	31	2.5	31	95	0	134	28	25	7	38	1.84
69442--69476	17	2.1	17	89	10	54	68	2	17	11	1.31
69540--69622	13	6.4	13	80	4	96	42	2	20	34	1.65
69662--69720	24	2.3	26	88	8	86	62	6	0	30	1.21
70063--70123	29	2.1	30	96	3	115	19	13	11	55	1.67
70289--70410	14	8.7	14	81	0	100	28	4	27	38	1.77
70307--70375	21	3.3	21	81	0	93	28	7	28	34	1.84
70307--70386	21	3.8	21	81	0	88	28	6	28	36	1.81
70297--70378	28	2.9	28	85	0	119	28	7	29	35	1.84
72317--72368	13	3.9	13	78	12	61	1	67	0	30	1.02
72317--72368	21	2.6	20	90	6	79	1	67	0	30	1.02
72323--72367	14	3.2	15	75	15	51	2	66	0	31	1.04
73511--73603	44	2.2	42	81	7	107	25	3	20	50	1.63
74042--74096	18	3.1	18	72	0	56	30	7	5	56	1.49
74464--74521	29	2	29	89	0	89	17	8	22	51	1.72
74679--74743	13	5	13	71	0	58	30	7	32	29	1.85
74681--74743	26	2.4	26	100	0	126	30	7	31	30	1.86
80457--80545	30	3	30	84	0	124	28	7	13	50	1.69
80475--80517	21	2	21	81	0	50	30	2	13	53	1.53
82399--82429	12	2.5	13	89	10	55	25	19	6	48	1.72
83178--83207	13	2.2	14	94	5	53	56	0	3	40	1.16
83589--83619	12	2.5	12	94	5	53	0	0	9	90	0.46
85054--85094	17	2.4	17	95	0	73	7	21	4	65	1.37
85412--85506	21	4.6	21	86	5	113	66	16	16	0	1.26
85522--85615	18	5.2	18	100	0	188	27	17	0	55	1.42
85634--85700	12	5.6	12	87	0	80	28	14	19	37	1.91
85706--85752	21	2.2	21	92	0	85	29	21	27	21	1.98
86647--86704	12	4.9	12	91	2	91	27	1	18	51	1.56
86684--86716	15	2.1	16	94	5	59	24	0	24	51	1.48
86871--86910	18	2.2	18	90	0	62	50	7	15	27	1.7
87230--87266	15	2.4	15	90	4	56	2	59	0	37	1.12
87905--87960	24	2.3	24	100	0	112	55	0	12	32	1.37
88489--88609	21	5.8	21	79	0	116	43	6	19	30	1.76
88768--88886	21	5.8	21	75	4	89	47	2	13	36	1.57
89343--89411	11	6	11	82	14	86	17	2	8	71	1.24
89344--89413	22	3.1	22	91	8	106	17	2	7	72	1.19
89540--89578	18	2.2	18	95	0	69	46	7	12	33	1.71
89721--89750	15	2	15	93	0	51	46	0	16	36	1.47
89721--89816	14	6.8	14	76	1	66	45	2	19	32	1.62
89771--89842	28	2.6	27	82	4	81	45	2	23	27	1.66
89785--89835	14	3.6	14	78	5	50	45	3	25	25	1.71
90110--90213	30	3.5	30	79	10	104	25	11	3	58	1.5
90217--90249	11	2.8	12	81	9	50	18	15	15	51	1.77
93320--93363	16	3.2	13	80	20	54	38	0	0	61	0.96
93449--93562	15	7.6	15	86	0	84	58	0	8	31	1.34
96660--96707	12	4	12	97	0	87	10	16	47	25	1.78
98534--98602	18	3.8	18	82	3	84	44	7	11	36	1.68
98537--98633	37	2.6	37	81	3	106	44	7	11	37	1.68
98613--98637	12	2.1	12	100	0	50	44	0	8	48	1.32
98537--98646	43	2.6	43	83	1	132	44	6	10	38	1.65
98620--98651	17	1.9	16	93	6	55	46	0	6	46	1.27
98895--98934	15	2.7	15	96	0	71	30	12	5	52	1.6
99196--99244	19	2.6	19	86	0	71	26	2	14	57	1.48
99220--99299	14	5.7	14	76	14	76	35	0	16	48	1.46
99227--99300	28	2.6	28	91	4	123	36	0	13	50	1.42
99467--99504	15	2.4	16	91	4	60	23	10	21	44	1.83
99476--99524	20	2.4	21	89	3	73	26	12	20	40	1.87
99612--99698	25	3.5	24	85	4	111	32	4	4	58	1.39
99840--99873	14	2.4	14	95	0	59	38	0	20	41	1.53
100212--100273	32	1.9	32	83	6	81	40	9	17	32	1.82
100453--100504	22	2.4	22	90	0	77	32	11	1	53	1.48
100533--100565	16	2.1	16	100	0	66	33	30	6	30	1.82
100724--100811	16	5.4	16	81	5	113	27	25	19	28	1.99
100711--100811	33	3.1	33	97	0	184	27	25	17	28	1.98
100964--100993	12	2.5	12	100	0	60	26	23	16	33	1.96
101035--101093	24	2.5	24	75	8	59	44	27	0	28	1.55
101095--101141	14	3.4	14	84	0	67	40	6	8	44	1.6
101206--101272	12	5.6	12	85	0	89	59	0	13	26	1.34
101206--101272	24	2.8	24	88	0	107	59	0	13	26	1.34
101219--101272	18	3.1	17	86	5	72	59	0	14	25	1.36
101290--101321	15	2.1	15	94	0	55	28	12	15	43	1.83
101305--101394	47	1.9	47	100	0	180	25	17	11	45	1.81
101424--101509	13	7	13	69	12	74	34	11	5	47	1.64
101415--101568	26	6.3	26	75	18	161	35	12	5	47	1.63
101450--101574	21	5.5	21	75	17	124	36	10	5	47	1.61
101424--101592	47	3.6	47	93	3	279	34	12	4	47	1.62
101762--101856	40	2.4	40	90	0	163	32	16	0	50	1.46
101887--101916	15	1.9	16	93	6	53	26	30	3	40	1.72
101996--102028	14	2.4	14	94	0	57	39	9	27	24	1.85
101917--102008	20	4.6	20	100	0	184	40	9	21	28	1.85
102035--102088	19	2.5	23	71	25	62	38	16	14	29	1.89
102218--102250	16	2.1	16	94	0	57	39	15	0	45	1.46
102280--102368	32	2.8	32	91	0	151	47	13	7	31	1.71
102404--102448	15	3	15	83	0	54	28	13	0	57	1.36
102482--102744	13	20.8	13	64	13	102	42	18	3	35	1.68
102495--102587	26	3.6	26	89	4	136	39	18	3	38	1.67
102598--102665	31	2.2	32	83	2	84	42	20	4	32	1.72
102598--102747	56	2.7	56	79	7	178	43	18	4	34	1.69
102641--102813	12	14.1	12	73	12	84	43	18	1	36	1.61
102639--102764	19	6.4	19	66	23	57	46	19	2	32	1.63
102673--102743	25	2.8	25	89	0	106	46	15	2	35	1.61
102639--102828	25	7.7	25	71	10	97	44	17	2	36	1.61
102722--102802	18	4.4	18	79	1	72	43	18	0	38	1.5
102998--103076	25	3.2	25	98	0	149	32	3	17	45	1.67
103134--103207	21	3.5	21	100	0	148	28	9	10	51	1.68
103112--103167	28	2	28	100	0	112	28	10	10	50	1.71
103113--103160	14	3.4	14	77	11	62	29	8	10	52	1.65
103218--103333	41	2.8	41	94	2	196	31	0	8	60	1.27
103219--103333	31	3.7	30	81	6	140	31	0	8	60	1.27
103264--103336	26	2.8	26	78	19	80	32	0	8	58	1.27
103327--103438	27	4.4	27	84	15	166	35	0	17	46	1.49
103351--103546	14	14.5	13	75	17	106	33	2	13	51	1.52
103327--103438	48	2.4	48	88	10	176	35	0	17	46	1.49
103580--103686	11	9.2	11	76	13	99	33	6	13	46	1.68
103591--103693	36	2.9	36	97	0	188	33	5	13	46	1.67
103578--103686	47	2.3	47	84	9	134	33	6	13	45	1.69
103686--103793	18	6.2	18	73	20	95	31	12	12	43	1.8
104649--104728	20	4	20	96	0	133	48	7	10	33	1.65
104786--104832	22	2.1	22	100	0	94	27	25	8	38	1.85
104914--104984	21	3.6	21	76	18	80	38	19	5	36	1.76
104929--105014	16	5.1	16	80	13	100	39	22	5	32	1.78
104914--105000	37	2.4	37	94	0	147	37	20	5	35	1.77
105027--105155	31	4.2	31	88	0	195	40	18	2	38	1.64
105208--105257	25	2.1	24	85	7	66	30	20	0	50	1.49
105190--105272	40	2.1	40	93	0	139	27	24	0	48	1.52
105203--105280	15	5.5	15	73	14	76	29	24	0	46	1.53
105340--105413	36	2.1	36	84	0	94	37	17	8	36	1.8
105413--105455	12	3.6	12	96	0	77	25	0	34	39	1.56
105408--105467	24	2.5	24	83	0	84	28	0	28	43	1.55
105726--105814	20	4.2	20	69	18	72	26	17	8	46	1.78
105730--105814	15	5.3	15	77	13	89	27	18	9	44	1.8
105717--105818	50	2.1	50	89	8	160	27	17	7	47	1.75
105931--106014	26	3.3	24	93	3	105	27	1	15	55	1.47
105947--105995	16	3.4	16	69	30	56	26	0	16	57	1.4
105943--106019	26	3	26	96	1	138	25	0	16	57	1.4
106080--106238	22	7.2	22	89	2	239	35	10	22	30	1.88
106254--106365	22	5.4	21	75	14	124	46	2	20	30	1.64
106254--106367	43	2.7	42	88	9	155	46	2	21	29	1.65
106359--106440	41	2	41	90	0	128	45	2	23	29	1.66
106416--106474	11	5.5	11	81	4	57	35	6	27	30	1.83
106410--106484	11	6.9	11	78	3	53	36	6	25	32	1.82
106541--106578	20	1.9	20	88	0	58	52	2	15	28	1.56
106665--106770	24	4.4	24	96	0	158	38	3	20	36	1.71
106798--106868	36	2	36	85	0	97	46	12	21	19	1.83
106928--107022	18	5.6	18	74	18	96	42	9	24	24	1.84
106931--107001	30	2.4	30	95	4	126	43	7	26	22	1.78
106931--107022	30	2.7	36	82	16	115	42	9	25	22	1.84
107072--107146	30	2.5	31	95	4	136	42	0	25	32	1.55
107151--107210	22	2.8	21	70	14	59	33	5	35	26	1.78
107170--107234	27	2.3	27	86	5	94	33	6	33	26	1.81
107219--107257	12	3.3	12	79	13	53	35	2	41	20	1.66
107453--107533	28	2.9	28	90	0	117	45	7	11	35	1.68
107509--107613	37	3.1	36	77	21	134	40	3	6	48	1.47
107529--107605	29	2.7	29	97	0	145	40	2	6	50	1.42
108424--108534	32	3.5	32	98	0	213	48	16	6	28	1.7
108593--108691	24	4	24	78	19	103	41	14	9	35	1.77
108585--108696	52	2.1	53	86	4	156	41	16	8	34	1.77
108878--109030	28	5.6	28	79	9	163	42	3	20	33	1.69
108878--109054	56	3.2	53	78	9	187	41	4	21	32	1.73
109039--109073	15	2.3	15	100	0	70	40	5	34	20	1.76
109163--109264	42	2.4	42	100	0	204	41	11	13	33	1.81
109370--109450	21	3.9	20	75	6	72	45	17	3	33	1.66
109491--109618	39	3.6	36	85	13	158	37	6	3	53	1.42
109518--109572	25	2.3	24	84	12	76	40	3	1	54	1.28
109644--109732	12	7.4	12	83	0	97	42	23	1	32	1.62
109743--109821	14	5.6	14	79	5	70	29	6	7	56	1.52
109734--109824	21	4.3	21	78	10	87	29	5	6	58	1.46
109844--109927	21	4	21	98	0	159	48	17	0	33	1.48
109940--109973	14	2.4	14	100	0	68	35	11	0	52	1.38
109947--110009	32	2	32	87	0	90	31	12	7	47	1.7
109975--110011	14	2.6	14	82	0	56	29	13	10	45	1.77
109992--110051	23	2.6	23	97	0	111	26	16	8	48	1.75
110039--110101	32	2	32	87	6	92	36	12	6	44	1.68
110063--110104	14	2.9	15	79	10	52	38	9	4	47	1.57
110298--110379	26	3.2	26	100	0	164	34	0	7	58	1.26
110424--110464	18	2.3	18	91	0	64	39	4	14	41	1.67
110502--110598	32	3.2	32	82	14	141	26	11	9	52	1.67
110650--110740	41	2.2	41	96	0	164	32	17	16	32	1.93
110800--110874	14	5.4	14	100	0	150	21	8	13	57	1.61
110884--111030	26	5.7	25	87	3	177	24	14	8	53	1.68
110884--111030	78	1.9	78	87	2	215	24	14	8	53	1.68
112998--113027	13	2.3	13	100	0	60	70	13	0	16	1.18
Cyathus pallidus QL1
Indices	Period Size	Copy Number	Consensus Size	Percent Matches	Percent Indels	Score	A	C	G	T	Entropy (0-2)
83010--83169	12	13.3	12	89	0	212	25	15	28	30	1.96
3894--4147	20	12.5	20	71	11	86	57	8	16	18	1.63
17419--17554	15	9.4	15	75	9	95	57	1	11	30	1.42
105240--105343	12	8.7	12	75	12	54	57	18	2	21	1.53
62960--63080	14	8.6	14	83	0	71	54	0	12	33	1.38
110732--110867	16	8.5	16	77	9	125	58	0	27	14	1.37
13083--13237	18	8.3	18	80	9	123	56	7	6	29	1.52
37234--37334	12	8.3	12	81	2	103	31	14	0	52	1.49
88255--88410	20	7.6	20	70	19	88	56	14	2	26	1.51
62967--63069	14	7.4	14	83	6	95	54	0	10	34	1.35
89611--89712	14	7.4	14	76	10	75	73	5	1	18	1.13
64742--64829	12	7.3	12	78	0	86	43	17	17	22	1.88
88255--88382	20	6.7	20	79	8	113	53	15	3	27	1.57
36773--36898	20	6.6	20	83	9	156	25	27	0	46	1.53
46631--46708	12	6.5	12	89	0	75	64	10	0	25	1.25
83014--83169	24	6.5	24	90	0	240	25	16	27	30	1.96
3467--3580	18	6.3	18	79	8	117	25	9	7	57	1.55
10782--10854	12	6.2	12	85	4	87	24	31	19	24	1.98
88257--88412	25	6.2	25	79	0	159	55	14	2	27	1.52
100259--100431	28	6.2	28	71	11	104	19	24	1	54	1.51
3895--4073	30	6	30	71	12	125	58	8	16	17	1.62
6874--6998	21	6	21	91	0	196	52	32	0	16	1.44
58001--58072	12	6	12	98	0	135	43	23	8	25	1.81
13977--14086	20	5.8	20	67	10	68	50	16	4	29	1.65
64454--64522	12	5.8	12	84	0	57	50	15	14	18	1.78
85341--85477	24	5.7	24	73	0	112	40	8	26	24	1.84
113994--114112	21	5.7	21	95	0	211	39	4	21	34	1.73
3499--3598	18	5.6	18	76	15	91	25	11	6	58	1.55
37234--37334	18	5.6	18	80	2	103	31	14	0	52	1.49
94080--94197	21	5.6	21	80	12	102	72	14	2	11	1.23
100694--100796	18	5.6	18	85	2	134	38	51	0	8	1.4
69783--69841	11	5.5	11	76	8	68	67	20	3	8	1.31
89409--89506	18	5.5	18	93	1	162	31	20	6	41	1.77
13283--13347	12	5.4	12	86	0	85	53	23	18	4	1.62
20945--21041	18	5.4	18	78	14	76	50	17	6	25	1.69
88625--88738	21	5.4	21	78	6	90	35	21	3	38	1.71
12803--12880	15	5.2	15	88	0	84	70	0	1	28	0.95
62960--63069	21	5.2	21	75	13	102	54	0	10	35	1.34
64737--64829	18	5.2	18	86	0	123	44	17	16	22	1.87
73357--73429	14	5.2	14	91	0	83	65	6	5	21	1.37
8414--8474	12	5.1	12	72	7	52	36	3	3	57	1.31
63571--63676	21	5.1	21	76	14	85	58	17	12	11	1.62
17397--17572	35	5	35	80	0	163	55	1	11	31	1.45
88648--88716	14	4.9	14	87	0	84	30	23	1	44	1.62
102170--102228	12	4.9	12	93	0	91	49	16	6	27	1.71
7319--7380	13	4.8	13	91	0	106	53	16	3	27	1.58
53348--53434	18	4.8	18	76	10	70	21	20	0	57	1.41
101712--101792	17	4.8	16	80	7	90	14	13	1	70	1.23
16833--16903	15	4.7	15	78	5	72	28	43	0	28	1.55
85213--85325	24	4.7	24	88	6	149	40	16	0	42	1.49
91426--91481	12	4.7	12	86	8	71	73	8	0	17	1.08
97896--97949	12	4.7	12	79	6	58	16	31	0	51	1.45
10013--10117	24	4.4	24	83	0	138	67	7	4	20	1.34
13886--13971	20	4.4	21	72	21	80	53	10	8	27	1.63
46631--46710	18	4.4	18	83	0	79	63	11	0	25	1.27
62239--62327	20	4.4	20	90	2	101	53	8	0	37	1.32
64404--64456	12	4.4	12	97	0	97	39	16	0	43	1.49
70967--71019	12	4.4	12	90	0	79	18	15	7	58	1.6
93707--93767	14	4.4	14	68	15	54	50	18	13	18	1.77
99991--100052	14	4.4	14	83	0	70	43	27	6	22	1.77
56751--56802	12	4.3	12	77	0	50	36	7	15	40	1.76
70079--70190	25	4.3	25	81	10	125	68	7	3	20	1.28
83014--83169	36	4.3	36	89	0	240	25	16	27	30	1.96
4046--4149	25	4.2	25	75	3	93	59	6	16	17	1.57
6806--6869	16	4.2	15	76	15	69	60	9	4	25	1.46
18995--19094	24	4.2	24	85	5	148	62	3	5	30	1.32
28975--29050	18	4.2	17	78	11	80	11	1	6	80	0.96
37234--37334	24	4.2	24	85	2	130	31	14	0	52	1.49
103241--103302	15	4.2	15	82	10	65	61	14	6	17	1.53
36773--36898	30	4.1	30	79	10	137	25	27	0	46	1.53
37715--37775	15	4.1	15	73	0	68	29	9	3	57	1.47
70077--70192	30	4.1	30	85	14	158	69	6	3	19	1.26
13100--13259	42	4	42	79	9	134	56	7	8	26	1.56
59417--59487	18	3.9	18	92	0	124	50	15	11	22	1.75
101362--101427	17	3.9	17	73	9	64	50	10	7	31	1.65
101696--101792	25	3.9	24	79	11	90	14	13	1	71	1.21
102170--102240	18	3.9	18	83	3	63	50	15	5	28	1.66
7189--7241	14	3.8	14	97	0	97	50	7	11	30	1.65
13092--13235	36	3.8	36	84	10	180	56	8	6	29	1.53
61015--61113	25	3.8	25	76	17	83	33	9	0	57	1.3
73464--73509	12	3.8	12	85	0	65	58	19	4	17	1.55
48013--48056	12	3.7	12	87	0	70	70	13	9	6	1.33
73019--73074	15	3.7	15	72	13	53	73	14	1	10	1.18
87704--87792	24	3.7	24	77	3	63	25	20	13	40	1.89
89217--89283	18	3.7	18	82	7	82	61	20	16	1	1.42
110749--110867	33	3.7	31	86	5	114	57	0	28	14	1.38
113310--113368	16	3.7	16	93	0	91	50	13	13	22	1.76
4366--4416	14	3.6	14	80	19	61	5	0	17	76	0.98
70092--70195	30	3.6	30	86	12	164	68	6	3	21	1.29
105279--105343	18	3.6	18	77	8	60	55	18	3	23	1.56
108259--108301	12	3.6	12	87	0	68	39	0	0	60	0.97
60206--60250	13	3.5	13	81	0	54	44	13	22	20	1.85
70873--70925	15	3.5	15	92	0	88	73	7	1	16	1.15
101357--101443	25	3.5	24	79	11	88	51	11	6	29	1.64
104705--104762	15	3.5	15	75	20	62	43	12	0	44	1.41
8414--8474	18	3.4	18	79	4	52	36	3	3	57	1.31
12140--12224	25	3.4	25	70	6	82	31	10	5	51	1.6
13221--13281	18	3.4	18	77	8	61	62	1	21	14	1.41
13498--13639	42	3.4	41	77	9	117	28	3	21	46	1.68
37308--37367	18	3.4	17	75	9	57	46	13	3	36	1.6
64453--64514	18	3.4	18	77	0	61	50	16	16	17	1.79
93871--93921	14	3.4	15	74	15	52	45	1	0	52	1.12
13918--13974	16	3.3	16	70	25	53	52	12	7	28	1.64
33997--34049	16	3.3	16	83	0	79	67	7	0	24	1.16
38278--38326	15	3.3	15	82	0	62	32	16	2	48	1.57
38746--38791	14	3.3	14	81	0	56	63	6	8	21	1.46
39794--39844	15	3.3	15	76	10	57	66	7	3	21	1.34
46833--46881	15	3.3	15	100	0	98	34	36	8	20	1.82
62229--62328	30	3.3	30	83	2	121	56	9	0	35	1.31
73452--73510	18	3.3	18	72	13	59	61	15	6	16	1.55
99662--99721	18	3.3	18	84	9	77	20	3	15	61	1.47
110725--110833	33	3.3	33	94	0	182	60	0	24	14	1.34
2326--2364	12	3.2	12	92	7	62	74	7	0	17	1.05
2788--2838	16	3.2	16	85	0	75	66	7	3	21	1.34
10799--10854	18	3.2	18	94	2	96	26	32	17	23	1.97
33769--33814	15	3.2	13	87	12	56	80	19	0	0	0.71
75012--75088	24	3.2	24	90	0	109	54	28	0	16	1.43
85065--85141	24	3.2	24	100	0	154	25	16	9	48	1.76
102689--102727	12	3.2	12	92	0	60	71	10	0	17	1.12
2740--2789	16	3.1	16	94	0	82	58	6	8	28	1.51
49995--50041	15	3.1	15	72	22	53	46	0	4	48	1.21
73998--74054	19	3.1	19	82	10	73	50	3	24	21	1.64
13487--13611	42	3	42	78	9	121	27	4	20	48	1.68
87522--87587	21	3	21	86	6	69	57	1	6	34	1.33
88324--88412	30	3	30	89	0	133	58	12	2	26	1.46
99933--99996	21	3	21	95	0	110	54	14	23	7	1.65
2597--2632	13	2.9	12	84	8	54	69	22	0	8	1.15
7319--7398	26	2.9	26	85	7	106	52	17	2	27	1.57
13746--13796	17	2.9	18	94	2	86	23	23	1	50	1.59
20707--20760	18	2.9	18	86	2	63	55	3	3	37	1.35
62202--62243	15	2.9	14	86	10	57	69	11	2	16	1.29
69782--69841	21	2.9	21	100	0	120	66	20	3	10	1.35
70967--71019	18	2.9	18	88	0	79	18	15	7	58	1.6
84007--84053	16	2.9	16	75	12	51	53	17	4	25	1.62
108671--108728	20	2.9	19	82	10	55	25	5	6	62	1.42
2326--2377	18	2.8	18	82	2	59	69	9	1	19	1.26
3197--3289	34	2.8	33	77	6	89	45	10	15	29	1.79
13231--13263	12	2.8	12	86	13	50	66	0	21	12	1.23
33774--33814	15	2.8	15	89	10	59	82	17	0	0	0.66
79964--80002	14	2.8	14	92	0	69	15	2	5	76	1.06
84615--84661	17	2.8	17	100	0	94	23	23	6	46	1.75
85347--85479	48	2.8	48	82	0	158	40	8	25	25	1.83
99991--100049	21	2.8	21	78	0	73	44	27	5	23	1.74
100257--100394	49	2.8	49	73	13	131	20	23	0	55	1.48
104432--104488	21	2.8	21	91	2	89	64	7	8	19	1.44
112190--112258	24	2.8	24	80	2	66	53	15	10	20	1.71
14096--14133	15	2.7	14	84	8	51	65	13	0	21	1.26
17401--17544	55	2.7	53	89	5	204	56	2	11	30	1.46
88255--88382	45	2.7	47	90	6	188	53	15	3	27	1.57
94083--94136	20	2.7	20	94	0	99	77	14	3	3	1.04
100363--100438	28	2.7	28	89	0	116	18	22	2	56	1.54
104882--104935	20	2.7	20	73	0	63	37	16	1	44	1.59
113151--113258	40	2.7	40	77	0	126	52	10	15	21	1.72
9091--9204	44	2.6	44	92	1	183	38	16	7	37	1.76
11620--11709	35	2.6	35	90	0	144	46	6	13	33	1.69
37232--37310	31	2.6	31	89	2	115	29	15	1	54	1.49
37835--37872	14	2.6	15	87	4	51	89	5	2	2	0.64
56741--56803	24	2.6	24	79	0	72	34	7	15	41	1.77
63304--63334	12	2.6	12	100	0	62	35	29	0	35	1.58
64395--64456	24	2.6	24	92	0	97	45	16	0	38	1.47
74008--74073	26	2.6	25	88	4	89	46	4	25	22	1.7
84577--84620	17	2.6	17	92	0	79	11	29	6	52	1.63
110266--110339	29	2.6	29	95	0	139	29	14	25	29	1.95
3230--3311	33	2.5	33	83	2	92	47	9	14	28	1.76
8415--8474	24	2.5	24	78	10	77	36	3	3	56	1.32
13905--13993	36	2.5	36	94	0	151	49	15	6	28	1.7
17196--17240	18	2.5	18	85	7	56	51	15	15	17	1.77
33991--34049	24	2.5	24	91	5	93	66	8	1	23	1.29
49987--50061	30	2.5	30	88	0	114	54	0	4	41	1.19
85129--85173	18	2.5	18	100	0	90	35	15	20	28	1.93
89215--89273	24	2.5	24	91	8	102	61	20	18	0	1.35
2753--2810	24	2.4	24	79	0	71	62	5	6	25	1.42
14112--14159	20	2.4	20	82	6	62	52	16	0	31	1.45
15859--15901	18	2.4	18	88	0	59	18	2	2	76	1
61942--61967	11	2.4	11	100	0	52	84	15	0	0	0.62
63080--63113	14	2.4	14	90	0	50	47	8	11	32	1.71
86624--86742	49	2.4	49	98	0	229	42	10	1	45	1.49
11595--11626	14	2.3	14	94	0	55	65	0	3	31	1.08
17158--17198	18	2.3	18	86	0	64	75	0	0	24	0.8
37705--37773	30	2.3	30	84	0	84	30	10	2	56	1.47
48841--48873	15	2.3	15	89	5	50	57	9	0	33	1.3
61070--61103	15	2.3	15	100	0	68	35	5	0	58	1.22
91945--91985	18	2.3	18	86	0	55	36	2	14	46	1.58
92197--92221	11	2.3	11	100	0	50	48	28	8	16	1.74
103269--103302	14	2.3	15	90	5	52	55	20	2	20	1.56
107220--107244	11	2.3	11	100	0	50	92	0	0	8	0.4
111299--111347	21	2.3	21	89	0	71	40	12	10	36	1.77
3895--3982	40	2.2	40	81	4	106	59	10	13	17	1.61
13231--13295	30	2.2	30	85	0	85	60	4	23	12	1.51
42040--42084	20	2.2	20	84	4	54	20	24	33	22	1.97
50334--50364	14	2.2	14	94	0	53	80	6	0	12	0.89
59948--59985	17	2.2	18	95	4	69	65	0	0	34	0.93
60457--60495	18	2.2	18	95	0	69	17	17	10	53	1.71
62988--63080	42	2.2	42	90	0	141	53	0	16	30	1.43
72470--72502	15	2.2	15	94	0	57	54	12	3	30	1.52
77323--77361	18	2.2	18	95	0	69	33	17	0	48	1.48
77329--77367	18	2.2	18	90	0	60	46	17	0	35	1.49
80393--80458	30	2.2	30	100	0	132	36	0	3	60	1.12
85877--85914	18	2.2	18	95	4	69	50	13	0	36	1.42
87548--87599	24	2.2	24	89	0	77	59	3	7	28	1.43
87704--87742	18	2.2	18	90	0	60	23	30	12	33	1.92
102076--102132	26	2.2	26	96	0	105	33	26	14	26	1.94
104451--104497	21	2.2	21	88	0	67	72	6	4	17	1.22
104709--104762	25	2.2	25	89	0	81	42	11	0	46	1.39
104794--104826	15	2.2	15	94	0	57	45	12	0	42	1.41
105205--105256	24	2.2	24	89	0	77	48	36	1	13	1.54
113272--113361	40	2.2	40	90	0	135	53	11	16	18	1.72
3483--3545	30	2.1	30	96	0	117	26	7	7	57	1.55
13498--13534	18	2.1	19	85	10	51	29	2	18	48	1.62
18518--18549	15	2.1	15	94	0	55	71	9	0	18	1.12
37171--37208	18	2.1	18	90	0	58	63	5	5	26	1.37
47040--47073	16	2.1	16	100	0	68	23	29	5	41	1.78
56738--56774	18	2.1	18	89	0	56	43	8	16	32	1.77
61266--61295	14	2.1	14	93	0	51	60	3	23	13	1.48
63373--63423	25	2.1	24	81	3	57	52	13	0	33	1.41
74003--74091	44	2.1	42	87	8	126	49	5	22	22	1.7
82972--83021	24	2.1	24	92	0	82	38	22	26	14	1.91
112202--112238	18	2.1	18	89	0	56	48	21	8	21	1.76
113959--113988	15	2.1	15	93	6	53	0	0	16	83	0.65
3962--4010	25	2	25	83	0	62	57	8	16	18	1.63
9939--10002	31	2	33	85	11	89	17	15	4	62	1.49
10468--10522	28	2	27	86	10	76	81	3	1	12	0.89
11500--11546	24	2	24	87	8	69	40	0	10	48	1.38
15491--15591	51	2	51	92	0	166	42	9	5	41	1.62
15992--16034	22	2	22	81	9	52	41	23	0	34	1.55
21773--21802	15	2	15	100	0	60	0	20	33	46	1.51
38753--38793	21	2	21	95	0	73	60	7	12	19	1.54
54887--54926	20	2	20	85	0	53	37	35	0	27	1.57
59942--59985	23	2	22	95	4	79	65	0	0	34	0.93
86808--86848	20	2	20	95	0	73	34	46	14	4	1.66
87498--87587	45	2	45	82	0	108	61	1	6	31	1.29
87546--87592	24	2	24	95	0	85	55	4	8	31	1.49
96759--96803	22	2	22	91	0	72	73	17	0	8	1.08
98084--98124	21	2	21	90	0	64	63	31	2	2	1.2
98998--99042	23	2	23	100	0	90	66	0	0	33	0.92
101283--101310	14	2	14	100	0	56	57	21	7	14	1.61
105190--105223	17	2	17	94	0	59	50	38	0	11	1.39
7612--7680	36	1.9	36	100	0	138	28	13	17	40	1.87
13853--13890	20	1.9	20	88	0	58	55	5	2	36	1.37
59570--59605	18	1.9	19	88	5	56	66	13	5	13	1.41
61374--61404	16	1.9	16	93	0	53	51	6	3	38	1.44
66400--66429	15	1.9	16	93	6	53	46	6	0	46	1.29
112212--112246	18	1.9	18	88	0	52	51	22	8	17	1.72
Cyathus stercoreus NPCB004
Indices	Period Size	Copy Number	Consensus Size	Percent Matches	Percent Indels	Score	A	C	G	T	Entropy (0-2)
112207--112455	20	12.6	20	67	8	96	53	5	9	31	1.55
38632--38878	21	12.1	21	68	15	99	42	19	0	37	1.58
106950--107092	13	11.2	13	74	11	134	53	12	6	27	1.63
5470--5588	12	9.8	12	77	1	85	21	21	7	49	1.74
33084--33189	11	9.6	11	76	8	72	33	26	16	23	1.96
5752--5892	16	8.8	16	88	0	174	24	20	11	43	1.85
28846--28981	16	8.8	16	68	9	66	33	29	15	22	1.94
31056--31149	11	8.3	11	86	3	107	41	15	4	38	1.67
28862--28994	16	8.1	16	71	6	95	33	30	15	21	1.93
53415--53509	12	7.9	12	78	0	82	43	15	4	36	1.67
112805--112924	16	7.4	16	81	13	106	25	6	9	58	1.53
62680--62792	15	7.2	15	72	9	64	54	15	0	28	1.47
39046--39222	25	7.1	24	77	10	133	48	6	14	30	1.7
63875--63954	12	6.8	12	73	7	65	32	18	6	42	1.75
111808--111890	12	6.8	12	77	8	87	50	10	3	34	1.55
119101--119198	14	6.8	15	82	9	114	64	11	7	17	1.47
5470--5588	18	6.6	18	79	1	85	21	21	7	49	1.74
90713--90803	14	6.4	14	74	6	58	37	9	3	49	1.53
30775--30891	18	6.2	18	71	14	83	37	16	25	20	1.93
51565--51654	15	6	15	98	0	162	60	13	2	24	1.45
39048--39222	31	5.8	31	71	17	118	48	6	14	30	1.7
62674--62788	20	5.8	20	79	6	108	54	15	1	27	1.51
114003--114071	12	5.8	12	82	0	75	39	23	13	24	1.9
51437--51578	25	5.7	25	91	0	212	46	8	6	38	1.6
78815--78882	12	5.7	12	82	6	66	63	7	1	27	1.3
5329--5395	12	5.6	12	85	0	89	23	28	0	47	1.52
106950--107092	26	5.6	26	82	6	150	53	12	6	27	1.63
1649--1725	14	5.5	14	96	0	145	20	6	7	64	1.42
21095--21175	14	5.5	15	78	11	87	61	1	2	34	1.17
93640--93700	11	5.5	11	94	3	97	67	8	0	24	1.18
112712--112852	25	5.5	25	71	19	85	25	14	7	51	1.69
53415--53509	18	5.3	18	74	0	82	43	15	4	36	1.67
73001--73095	18	5.3	18	83	1	111	13	12	12	61	1.58
48453--48525	14	5.2	14	72	6	58	17	35	6	39	1.77
111635--111762	25	5.2	24	73	14	100	32	18	4	44	1.71
35046--35134	18	5.1	18	76	13	78	40	23	4	31	1.75
52908--52988	16	5.1	16	71	11	58	53	20	12	13	1.72
39794--39859	13	5	13	85	5	80	43	13	1	40	1.53
110346--110551	41	5	41	89	0	304	52	17	4	25	1.63
110380--110479	19	4.9	19	70	13	65	55	19	2	24	1.54
32827--32940	24	4.8	24	73	18	87	45	4	16	33	1.67
49156--49315	35	4.8	35	72	10	136	28	21	10	38	1.87
88315--88371	12	4.8	12	91	0	78	42	7	12	38	1.7
99611--99665	12	4.8	12	71	15	53	69	21	0	9	1.16
25115--25242	27	4.7	27	80	0	94	28	21	9	41	1.84
60438--60523	18	4.7	18	83	8	102	58	6	3	31	1.42
111914--112029	25	4.6	25	94	2	189	37	29	6	26	1.82
125397--125465	15	4.6	15	73	7	59	65	2	2	28	1.22
42141--42240	22	4.5	21	72	16	69	37	15	23	25	1.93
63170--63236	15	4.5	15	88	0	62	40	26	0	32	1.57
25111--25229	27	4.4	27	81	2	132	29	22	9	38	1.85
74296--74357	14	4.4	14	83	0	61	24	16	1	58	1.47
106538--106598	14	4.4	14	77	4	61	57	4	1	36	1.3
55153--55239	20	4.3	20	68	21	65	50	11	8	29	1.67
92934--93002	16	4.3	16	71	0	66	57	15	4	21	1.55
109247--109422	41	4.3	41	92	0	280	64	6	2	26	1.31
21100--21190	21	4.2	22	75	12	73	61	2	3	32	1.24
28146--28200	13	4.2	13	95	4	94	47	7	14	30	1.71
97367--97441	18	4.2	18	81	13	91	16	1	8	74	1.11
112712--112781	17	4.2	17	79	1	52	27	15	4	52	1.61
31056--31149	23	4.1	23	84	2	111	41	15	4	38	1.67
60533--60590	14	4.1	14	76	8	64	34	27	0	37	1.57
185--232	12	4	12	91	0	78	62	16	0	20	1.33
40476--40559	21	4	21	75	6	82	51	9	22	16	1.73
61719--61830	28	4	28	76	7	104	32	21	27	18	1.97
73757--73841	21	4	21	80	7	91	47	20	17	15	1.83
29427--29481	14	3.9	13	90	4	65	29	16	7	47	1.73
32884--32930	12	3.9	12	94	0	85	48	0	19	31	1.49
62842--62896	14	3.9	14	82	0	74	34	20	20	25	1.96
77589--77646	15	3.9	15	84	2	64	34	18	0	46	1.5
111701--111814	31	3.9	31	76	15	134	35	15	4	44	1.67
35053--35150	26	3.8	26	100	0	196	42	22	4	30	1.72
52162--52275	30	3.8	30	88	0	156	57	23	1	17	1.5
66551--66652	27	3.8	27	85	5	143	31	18	13	36	1.9
73429--73474	12	3.8	12	94	0	65	30	10	2	56	1.46
78815--78882	18	3.8	18	80	0	82	63	7	1	27	1.3
86721--86816	24	3.8	24	72	20	86	31	32	11	25	1.91
21555--21598	12	3.7	12	76	11	54	63	15	2	18	1.41
21768--21833	18	3.7	18	100	0	132	34	10	33	21	1.88
32751--32809	16	3.7	16	90	4	84	27	47	1	23	1.61
38602--38731	35	3.7	35	94	0	224	41	18	0	40	1.51
42240--42367	35	3.7	35	84	0	157	63	17	6	13	1.49
52031--52135	29	3.7	29	88	3	142	47	24	12	15	1.8
76521--76566	12	3.7	12	82	8	56	67	13	2	17	1.33
95133--95184	14	3.7	14	89	0	77	55	7	13	23	1.63
119094--119198	29	3.7	29	82	7	115	65	10	6	17	1.44
30003--30052	14	3.6	14	86	0	64	26	32	0	42	1.56
41237--41302	18	3.6	18	74	11	62	24	10	13	51	1.72
48429--48528	28	3.6	28	75	5	94	17	36	8	39	1.79
53550--53592	12	3.6	12	100	0	86	25	39	9	25	1.85
54318--54361	12	3.6	12	96	3	79	63	6	0	29	1.2
106954--107092	38	3.6	39	78	6	149	53	12	6	27	1.62
30009--30082	21	3.5	21	74	7	60	29	27	0	43	1.55
51449--51495	15	3.5	15	67	27	50	46	8	6	38	1.6
73001--73093	27	3.5	27	83	1	107	13	12	12	60	1.6
74610--74650	12	3.5	11	86	3	55	70	9	2	17	1.25
29240--29300	19	3.4	19	74	21	76	32	21	0	45	1.52
51411--51578	50	3.4	50	88	0	183	47	8	7	36	1.63
63256--63303	14	3.4	14	94	0	87	58	18	0	22	1.39
66006--66046	12	3.4	12	93	0	64	75	4	2	17	1.08
66974--67040	20	3.4	19	85	4	80	52	31	4	11	1.58
75152--75197	14	3.4	14	82	11	60	50	4	23	21	1.67
76233--76284	15	3.4	16	82	10	65	55	3	1	38	1.29
94529--94589	18	3.4	18	95	0	104	8	37	6	47	1.59
111641--111812	55	3.4	49	80	11	141	31	18	5	44	1.71
111722--111826	31	3.4	31	81	1	113	38	15	3	42	1.65
28867--28945	24	3.3	24	78	0	95	36	32	13	16	1.88
61953--61992	12	3.3	12	82	0	53	15	17	15	52	1.75
63793--63832	12	3.3	12	96	0	71	45	0	32	22	1.53
65733--65863	40	3.3	40	91	0	172	66	9	7	16	1.43
71512--71560	15	3.3	15	94	0	80	20	24	2	53	1.56
77060--77128	21	3.3	21	85	0	93	46	20	5	27	1.73
88315--88373	18	3.3	18	82	0	73	44	6	11	37	1.68
90257--90305	15	3.3	15	79	0	53	20	16	18	44	1.86
23778--23824	15	3.2	15	96	3	87	55	12	0	31	1.38
29868--30003	42	3.2	41	88	3	182	38	10	11	38	1.76
32536--32573	12	3.2	12	84	0	58	52	21	0	26	1.47
48728--48794	21	3.2	21	91	0	98	43	29	8	17	1.8
60532--60599	21	3.2	21	82	12	86	36	25	0	38	1.56
69132--69169	12	3.2	12	88	0	58	55	0	15	28	1.41
74296--74362	21	3.2	21	77	8	73	25	14	1	58	1.46
87234--87271	12	3.2	12	96	0	67	18	0	13	68	1.21
95059--95103	14	3.2	14	80	0	63	57	24	0	17	1.4
99815--99872	18	3.2	18	80	4	55	50	17	5	27	1.67
99863--99920	18	3.2	18	80	0	71	31	34	1	32	1.68
123691--123781	28	3.2	28	88	0	128	30	1	19	48	1.56
21218--21267	16	3.1	16	91	2	82	72	0	16	12	1.13
28146--28220	26	3.1	24	76	21	77	46	9	14	29	1.76
29230--29281	16	3.1	16	70	24	52	30	23	0	46	1.53
34511--34555	14	3.1	14	81	6	54	68	0	0	31	0.89
54473--54519	15	3.1	15	84	0	58	46	27	0	25	1.53
78958--79026	22	3.1	23	77	4	63	60	24	2	11	1.44
109988--110061	24	3.1	24	81	9	64	21	5	2	70	1.2
114003--114057	18	3.1	18	81	0	65	40	23	12	23	1.89
39794--39854	20	3	20	86	6	88	42	13	1	42	1.53
48722--48783	21	3	21	95	0	106	43	27	11	17	1.83
86218--86262	15	3	15	96	0	81	15	33	17	33	1.92
92894--92964	24	3	24	82	0	79	60	14	9	15	1.58
92933--93005	24	3	24	77	0	92	54	17	6	20	1.65
114009--114079	24	3	24	82	0	88	38	23	12	25	1.9
123692--123755	21	3	21	90	4	94	31	0	20	48	1.5
5398--5449	18	2.9	18	85	0	68	34	15	17	32	1.91
28458--28493	12	2.9	12	87	4	54	72	11	2	13	1.23
31372--31406	12	2.9	12	100	0	70	51	14	17	17	1.77
39918--39969	18	2.9	18	83	11	63	73	11	0	15	1.11
52983--53028	16	2.9	16	83	0	56	60	15	4	19	1.51
63278--63444	61	2.9	62	82	9	210	41	19	9	29	1.83
90927--90981	20	2.9	18	84	10	74	25	20	21	32	1.97
110399--110459	19	2.9	22	73	14	74	54	18	3	24	1.58
28146--28200	20	2.8	19	91	8	85	47	7	14	30	1.71
29427--29485	21	2.8	21	94	5	102	28	15	6	49	1.7
32924--32957	12	2.8	12	90	0	50	29	5	20	44	1.75
33136--33197	22	2.8	22	85	0	88	30	30	17	20	1.96
40992--41040	18	2.8	16	77	17	53	22	4	8	65	1.37
42689--42755	24	2.8	24	93	2	107	34	17	16	31	1.93
50182--50220	14	2.8	14	88	0	60	46	41	0	12	1.42
63285--63444	54	2.8	56	85	10	202	40	20	10	29	1.84
71867--71924	21	2.8	21	86	0	80	44	31	6	17	1.75
77443--77478	13	2.8	12	91	8	54	72	2	0	25	0.98
88314--88396	30	2.8	30	86	0	103	40	7	13	38	1.72
93014--93104	32	2.8	32	96	0	164	52	19	2	25	1.57
108588--108672	30	2.8	30	72	0	89	40	27	12	20	1.89
112290--112356	25	2.8	25	82	8	86	52	2	11	32	1.53
112617--112747	47	2.8	46	82	5	156	27	16	6	48	1.71
112806--112852	17	2.8	17	83	3	60	25	14	8	51	1.71
5595--5658	23	2.7	24	95	4	121	56	12	3	28	1.51
21097--21175	28	2.7	29	84	5	97	62	1	2	34	1.17
30924--30971	18	2.7	18	90	0	69	35	12	31	20	1.9
38606--38661	21	2.7	21	77	8	60	39	19	0	41	1.52
48680--48794	42	2.7	42	77	5	108	43	26	10	19	1.83
53097--53128	12	2.7	12	95	0	55	28	0	9	62	1.26
66006--66054	18	2.7	18	87	6	64	73	8	2	16	1.16
77487--77542	21	2.7	21	88	5	78	48	7	5	39	1.54
78502--78541	15	2.7	15	88	0	53	35	17	0	47	1.48
28614--28644	12	2.6	12	100	0	62	45	12	16	25	1.83
35331--35451	46	2.6	46	84	0	170	46	10	15	27	1.79
43120--43166	18	2.6	18	79	0	58	57	10	2	29	1.44
47922--47961	16	2.6	15	88	4	53	75	12	0	12	1.06
49424--49467	17	2.6	17	80	16	56	75	2	2	20	1.03
75587--75622	14	2.6	14	90	0	63	63	0	0	36	0.94
77922--77967	18	2.6	18	82	0	56	30	39	17	13	1.87
88577--88615	15	2.6	15	91	0	60	46	0	0	53	1
107964--108071	42	2.6	41	84	7	137	21	26	3	48	1.67
111795--111890	37	2.6	36	83	8	115	48	11	4	35	1.58
5390--5444	18	2.5	24	64	32	59	36	14	18	30	1.91
5470--5559	37	2.5	36	85	3	117	23	21	7	47	1.76
28742--28800	24	2.5	24	81	15	77	47	20	15	16	1.83
29168--29210	17	2.5	17	92	7	70	48	11	16	23	1.78
31360--31405	18	2.5	19	86	10	69	52	10	19	17	1.74
53030--53082	21	2.5	21	100	0	106	47	35	0	16	1.48
53647--53705	24	2.5	24	85	0	82	57	18	0	23	1.4
72782--72808	11	2.5	11	100	0	54	55	0	18	25	1.43
76853--76902	20	2.5	20	87	6	66	34	4	2	60	1.27
77159--77196	15	2.5	15	95	0	67	44	26	5	23	1.74
84360--84410	20	2.5	20	84	6	59	25	3	7	62	1.4
93806--93851	18	2.5	18	82	10	58	82	2	0	15	0.76
5585--5628	18	2.4	18	80	0	52	59	11	2	27	1.44
21768--21833	27	2.4	27	100	0	132	34	10	33	21	1.88
30811--30867	24	2.4	24	84	0	69	36	17	24	21	1.94
33759--33809	21	2.4	21	96	0	93	50	19	11	17	1.76
52904--53020	48	2.4	48	85	5	148	54	19	9	16	1.68
60934--60966	14	2.4	14	100	0	66	66	6	0	27	1.15
75655--75712	24	2.4	24	82	0	71	41	22	12	24	1.87
101162--101199	16	2.4	16	95	0	67	42	0	13	44	1.43
119094--119198	43	2.4	43	92	3	176	65	10	6	17	1.44
186--240	24	2.3	25	87	6	87	65	16	0	18	1.27
6764--6804	18	2.3	19	83	12	59	21	60	0	17	1.35
28146--28220	33	2.3	33	90	2	116	46	9	14	29	1.76
32699--32740	18	2.3	18	95	0	75	33	42	7	16	1.75
38053--38080	12	2.3	12	100	0	56	57	17	17	7	1.62
42135--42234	44	2.3	44	78	3	112	35	16	24	25	1.95
62418--62461	19	2.3	19	80	15	54	68	9	0	22	1.18
71512--71580	30	2.3	30	80	5	77	23	20	4	52	1.64
73604--73645	18	2.3	18	95	0	75	66	9	4	19	1.38
77509--77540	14	2.3	14	100	0	64	50	6	6	37	1.53
77743--77798	24	2.3	24	78	6	60	78	7	1	12	1.02
90758--90805	21	2.3	21	88	0	69	43	8	0	47	1.33
106481--106528	21	2.3	21	92	0	78	27	43	12	16	1.84
112337--112394	25	2.3	24	88	8	89	60	1	10	27	1.39
1570--1621	24	2.2	24	86	6	70	38	25	11	25	1.89
21217--21269	24	2.2	23	83	9	70	69	0	16	13	1.18
28757--28808	24	2.2	24	85	0	68	53	17	13	15	1.72
29230--29306	35	2.2	35	100	0	154	29	23	0	46	1.52
32865--32890	12	2.2	12	100	0	52	50	0	7	42	1.31
38258--38298	19	2.2	19	95	0	73	73	12	0	14	1.11
49091--49166	34	2.2	35	83	2	91	28	23	9	38	1.86
53664--53698	16	2.2	16	94	0	61	54	14	0	31	1.4
55151--55279	60	2.2	60	87	2	179	50	10	9	29	1.68
74113--74159	21	2.2	21	88	0	67	27	17	8	46	1.76
92918--92986	32	2.2	32	91	0	111	57	14	7	20	1.6
99808--99847	18	2.2	18	95	0	71	50	12	5	32	1.62
101146--101199	24	2.2	24	90	0	81	44	3	12	38	1.61
101339--101376	18	2.2	18	95	4	69	0	5	28	65	1.14
107964--108056	42	2.2	42	88	7	145	21	25	3	49	1.64
4730--4780	24	2.1	24	81	3	57	27	33	15	23	1.95
5596--5656	29	2.1	29	87	0	86	55	13	3	27	1.53
6369--6397	14	2.1	14	100	0	58	65	20	0	13	1.26
12551--12587	18	2.1	18	89	0	56	64	0	5	29	1.15
22031--22076	22	2.1	22	100	0	92	30	26	0	43	1.55
28839--28871	16	2.1	16	94	0	57	33	24	15	27	1.95
32536--32586	24	2.1	24	85	0	66	49	21	3	25	1.67
41286--41310	12	2.1	12	100	0	50	36	16	16	32	1.9
52935--53018	40	2.1	40	84	4	107	57	17	7	17	1.62
62838--62895	28	2.1	28	100	0	116	36	22	17	24	1.95
71639--71663	12	2.1	12	100	0	50	16	24	0	60	1.36
86655--86734	38	2.1	38	84	9	101	35	31	6	27	1.82
95431--95519	43	2.1	43	80	4	99	38	24	4	32	1.76
111379--111417	19	2.1	19	85	0	51	25	41	0	33	1.56
112314--112382	33	2.1	33	83	5	86	57	2	10	28	1.46
14915--14958	22	2	21	83	16	54	40	0	11	47	1.39
34598--34642	23	2	23	95	0	81	28	13	2	55	1.5
48675--48717	21	2	21	86	0	59	48	18	9	23	1.76
49737--49863	65	2	65	87	4	188	62	17	9	10	1.52
52926--53004	40	2	40	82	9	99	55	18	8	16	1.66
53412--53470	30	2	30	89	0	91	38	20	8	32	1.83
62444--62483	21	2	20	90	5	62	62	5	5	27	1.37
74171--74209	20	2	20	84	0	51	17	25	5	51	1.66
75362--75389	14	2	14	100	0	56	57	21	7	14	1.61
75722--75770	24	2	24	84	7	64	40	18	8	32	1.8
88327--88385	30	2	30	96	0	109	42	6	10	40	1.65
95145--95187	21	2	21	86	0	59	55	6	13	23	1.62
95937--96018	42	2	42	92	0	137	46	9	20	23	1.8
99622--99665	21	2	21	86	4	61	68	22	0	9	1.18
110532--110586	27	2	28	89	3	85	45	14	3	36	1.63
121331--121379	24	2	24	88	0	71	67	0	2	30	1.02
4332--4395	33	1.9	34	93	3	112	23	18	7	50	1.73
8641--8670	15	1.9	16	93	6	53	13	36	6	43	1.7
9620--9657	20	1.9	20	88	0	58	28	2	5	63	1.3
31372--31406	18	1.9	18	100	0	70	51	14	17	17	1.77
34450--34531	43	1.9	43	82	5	103	41	13	1	43	1.51
35686--35729	22	1.9	24	86	9	65	31	4	15	47	1.66
41605--41633	15	1.9	15	100	0	58	55	6	0	37	1.27
42129--42170	22	1.9	22	85	0	57	45	11	21	21	1.84
55134--55246	60	1.9	60	92	3	192	51	9	8	30	1.65
74614--74647	18	1.9	17	88	5	50	73	5	2	17	1.16
75685--75719	18	1.9	18	88	0	52	34	28	17	20	1.95
75722--75779	30	1.9	30	82	6	73	43	17	6	32	1.75
82837--82869	17	1.9	17	100	0	66	84	9	0	6	0.76
94763--94884	63	1.9	63	93	3	210	41	17	13	27	1.87
100513--100553	21	1.9	22	90	5	66	48	2	31	17	1.6
114068--114102	18	1.9	18	94	0	61	42	20	14	22	1.88

[truncated: 6 more sheets: Sheet10, sheet11, Sheet12, Sheet13, Sheet14, Sheet15]
